# Supplementary material for: Eligibility for early rhythm control in patients with atrial fibrillation in the UK Biobank
Source: PubMed Central journal article supplement (PMC9664114; doi:10.1136/heartjnl-2022-321196), 2022-07-14
Supplement: heartjnl-2022-321196supp001.pdf [file heartjnl-2022-321196supp001.pdf]

2 **Supplement**

3  
4 **Methods**

5  
6  
7 **Data Collection**

8  
9 Our main dataset, including the baseline patient characteristics and the first date of AF  
10 diagnosis, was obtained based on the UK Biobank first date of AF diagnosis (field 131350) on  
11 15<sup>th</sup> April 2021. The corresponding HES and GP datasets were collected on 30<sup>th</sup> March 2021,  
12 with the latest diagnosis on HES (any comorbidity) being recorded on 2<sup>nd</sup> February 2021.  
13 First, a search for drug names was performed on the GP scripts, and the results obtained  
14 were then enriched with their corresponding BNF codes. Lists of drugs for each BNF code  
15 were compiled and checked by SK. A list of drug codes used in this study is provided in the  
16 supplementary material. The participants' age, at the time of AF diagnosis, was estimated  
17 from the age of the patient at enrollment and calculated using the fields date of admission  
18 (field 53), age at recruitment (21022), and the date of AF diagnosis from any source  
19 (131350). The diagnosis of diabetes was identified based on HES diagnosis information  
20 and/or a glycated hemoglobin (HbA1c – field 30750) level above 48 mmol/mol. The  
21 diagnosis of hypertension was provided on the basis of a HES diagnosis information or  
22 medications (field 6177 for males, and field 6153 for females, coding 2), or the blood  
23 pressure at recruitment (systolic above 140 fields 93 and 4080, diastolic above 80 fields 94  
24 and 4079). Heart failure was denoted based on HES diagnosis information and/or heart  
25 failure medications. Chronic kidney disease was identified based on HES diagnosis  
26 information, or  $15 \leq \text{GFR} < 60$ . GFR was calculated using information from fields cystatin-C  
27 (30720), creatinine blood (30700 – transformed to mg/dL using factor 0.0113), sex (31),  
28 ethnicity (21000 – any value on black group coding 4), and calculated age at diagnosis.  
29 Thyroid dysfunction was identified based on HES diagnosis information and/or treatment

30 with Levothyroxine. All cancer data was collected based on relevant HES ICD-10 codes and  
31 the date residing in the UKB Category 100092 field.

32

### 33 **Propensity-score matching and missing data**

34 For matching parameters, see the main paper methods section. Matching was performed  
35 without replacement. Analysis was performed this way to ensure a simpler analysis, as  
36 analysis with replacement would require weighting, and balancing for the repeated  
37 participants.<sup>1</sup> The participants were assessed for their standardised mean differences (SMD)  
38 to ensure good matching. Although there is no consensus on a good threshold for SMD,  
39 some authors use Cohen's definition of 0.2 as small, which has been chosen for this study.<sup>2</sup>  
40 Participants were analysed by the stratification of the outcome variable. Diagnoses and  
41 patient events that were not in the database were considered that they did not happen, as it  
42 is not possible to differentiate between missing and not happened events. Patient matching  
43 was performed with only complete data (excluded 6 participants in early rhythm-control,  
44 and 81 on usual care).

45

46

### 47 **Follow-up data collection**

48 To estimate the number of hospitalization days, spell data were connected to their episode  
49 data. This involved processing the original dataset (over 3.5 million episodes for all  
50 participants in the UK Biobank), removing episodes without admission and discharge date  
51 (248,368 episodes). For each spell, the earliest and latest date from records were recorded  
52 and used as reference for hospitalization. Incident repeat events were obtained from the  
53 count of unique spell identifiers where a patient had events 6 months after the date of atrial  
54 fibrillation.

55 Mortality information was obtained from the UK Biobank fields 40000 and 40001.  
56 Cardiovascular death was considered based on the following ICD codes: I10-I15; I20-I28; I30-  
57 I52; I70-I79. Patient follow-up was obtained from the maximal date of records on GP  
58 records, HES, or death. Records that had any of special placeholder dates were ignored  
59 (1900-01-01, 1901-01-01, 1902-02-02, 1903-03-03, or 2037-07-07). Two participants with AF  
60 marked at the same day of birth were discarded. For the disease onset, a diagnosis in the  
61 hospital inpatient data was required to form the primary reason of visit. Survival models  
62 were created using Cox proportional hazards regression model, modelling the occurrence of  
63 each event depending on the rhythm group.<sup>3</sup> Cox regression is a very well-known tool to  
64 study the effect of time on dependent variables. Our models were created with each  
65 predicted outcome, time to event (or censoring), against the type of treatment the patients  
66 had. In the two experiments run (unmatched and matched data) resulted in the estimated  
67 HR without correction (unmatched data) and the HR corrected for similar participants  
68 (matched data).

69  
70  
71

## 72 **R-packages for statistical analysis**

73  
74

- 75 - Zhicheng Du and Yuantao Hao (2019). stddiff: Calculate the Standardized Difference  
76 for Numeric, Binary and Category Variables. R package version 3.0.
- 77 - <https://CRAN.R-project.org/package=stddiff>
- 78
- 79 - G. van Rossum, Python tutorial, Technical Report CS-R9526, Centrum voor Wiskunde  
80 en Informatica (CWI), Amsterdam, May 1995."
- 81
- 82 - J Myles Hollander and Douglas A. Wolfe (1973), Nonparametric Statistical Methods.  
83 New York: John Wiley & Sons. Pages 115-120.
- 84
- 85 - Chambers, J. M., Freeny, A and Heiberger, R. M. (1992) Analysis of variance; designed  
86 experiments. Chapter 5 of Statistical Models in S eds J. M. Chambers and T. J. Hastie,  
87 Wadsworth & Brooks/Cole.
- 88

- 89 - Fisher, R. A. (1970). *Statistical Methods for Research Workers*. Oliver & Boyd.  
90
- 91 - Clarkson, D. B., Fan, Y. and Joe, H. (1993) A Remark on Algorithm 643: FEXACT: An  
92 Algorithm for Performing Fisher's Exact Test in  $r \times c$  Contingency Tables. *ACM*  
93 *Transactions on Mathematical Software*, 19, 484-488. doi: 10.1145/168173.168412.  
94
- 95 - R Core Team (2020). *R: A language and environment for statistical computing*. R  
96 Foundation for Statistical Computing, Vienna, Austria. URL [https://www.R-](https://www.R-project.org/)  
97 [project.org/](https://www.R-project.org/).  
98
- 99 - Daniel E. Ho, Kosuke Imai, Gary King, Elizabeth A. Stuart (2011). MatchIt:  
100 Nonparametric Preprocessing for Parametric Causal Inference. *Journal of Statistical*  
101 *Software*, Vol. 42, No. 8, pp. 1-28. URL <https://www.jstatsoft.org/v42/i08/>  
102
- 103 - Garrett Grolemond, Hadley Wickham (2011). Dates and Times Made Easy with  
104 lubridate. *Journal of Statistical Software*, 40(3), 1-25. URL  
105 <https://www.jstatsoft.org/v40/i03/>.  
106
- 107 - Matt Dowle and Arun Srinivasan (2020). data.table: Extension of `data.frame`. R  
108 package version 1.13.6. <https://CRAN.R-project.org/package=data.table>  
109
- 110 - Therneau T (2021). *\_A Package for Survival Analysis in R\_*. R package version 3.2-10,  
111 <URL: <https://CRAN.R-project.org/package=survival>>.  
112
- 113 - Terry M. Therneau, Patricia M. Grambsch (2000). *\_Modeling Survival Data: Extending*  
114 *the Cox Model\_*. Springer, New York. ISBN 0-387-98784-3.  
115
- 116 - Bendix Carstensen, Martyn Plummer, Esa Laara, Michael Hills (2021). Epi: A Package  
117 for Statistical Analysis in Epidemiology. R package version 2.44. URL  
118 <https://CRAN.R-project.org/package=Epi>  
119
- 120 - Bob Gray (2020). cmprsk: Subdistribution Analysis of Competing Risks. R package  
121 version 2.2-10. <https://CRAN.R-project.org/package=cmprsk>  
122
- 123 - Alboukadel Kassambara, Marcin Kosinski and Przemyslaw Biecek (2021). survminer:  
124 Drawing Survival Curves using 'ggplot2'. R package version 0.4.9.  
125 <https://CRAN.R-project.org/package=survminer>  
126
- 127 - Claus O. Wilke (2020). cowplot: Streamlined Plot Theme and Plot Annotations for  
128 'ggplot2'. R package version 1.1.1. <https://CRAN.R-project.org/package=cowplot>  
129

130  
131  
132  
133

### Supplemental Tables

|                                                        | Not Eligible (5524) | Eligible (22650) |
|--------------------------------------------------------|---------------------|------------------|
| Age (years, 1 <sup>st</sup> -3 <sup>rd</sup> quartile) | 63 (58-67)          | 70 (66-74)       |
| CHA <sub>2</sub> DS <sub>2</sub> -VASc                 | 1 (1-2)             | 3 (2-4)          |
| Inclusion criteria                                     |                     |                  |
| Age > 75 years                                         | 158 (3%)            | 3373 (15%)       |
| Prior stroke                                           | 121 (2%)            | 2141 (9%)        |
| Or 2 of the following                                  |                     |                  |
| Age > 65                                               | 1546 (28%)          | 18075 (80%)      |
| Severe coronary artery disease                         | 519 (9%)            | 6922 (31%)       |
| Chronic kidney disease                                 | 308 (6%)            | 2236 (10%)       |
| Diabetes mellitus                                      | 386 (7%)            | 4236 (19%)       |
| Heart Failure                                          | 579 (10%)           | 7303 (32%)       |
| Hypertension                                           | 3224 (58%)          | 20775 (92%)      |
| Peripheral artery disease                              | 116 (2%)            | 998 (4%)         |
| Female sex                                             | 1153 (21%)          | 9552 (42%)       |
| Exclusion criteria                                     |                     |                  |
| Severe mitral valve stenosis                           | 45 (1%)             | 0 (0%)           |
| Prosthetic mitral valve                                | 62 (1%)             | 0 (0%)           |
| Hepatic dysfunction                                    | 526 (10%)           | 0 (0%)           |
| Thyroid dysfunction untreated                          | 272 (5%)            | 0 (0%)           |
| Severe renal dysfunction                               | 245 (4%)            | 0 (0%)           |
| Woman < age 45 (to exclude pregnancy)                  | 25 (0%)             | 0 (0%)           |
| Drug abuse                                             | 10 (0%)             | 0 (0%)           |
| Prior ablation                                         | 228 (4%)            | 0 (0%)           |

134 **Supplemental Table 1:** Overview of participants included and excluded. Participants with  
135 atrial fibrillation for longer than 1 year were not considered.  
136

137

|                                                                    | Early rhythm-control (N=868) | Usual care (N=868)  | P-value |
|--------------------------------------------------------------------|------------------------------|---------------------|---------|
| Follow-up duration (years)                                         | 4.92 (2.98-6.91)             | 4.13 (1.65-6.69)    |         |
| Age (years)                                                        | 68 (64-70)                   | 68 (65-71)          | < 0.001 |
| Body mass index (kg/m <sup>2</sup> )                               | 28.16 (25.27-31.51)          | 28.38 (25.73-31.67) | 0.063   |
| Days until treatment                                               | 44.50 (18-153.75)            | -                   | 0.335   |
| Sex (male)                                                         | 504 (58%)                    | 512 (59%)           | -       |
| Chronic kidney disease                                             | 67 (8%)                      | 59 (7%)             | 0.733   |
| Diabetes                                                           | 112 (13%)                    | 112 (13%)           | 0.517   |
| Heart failure                                                      | 522 (60%)                    | 520 (60%)           | 1.000   |
| Hypertension                                                       | 797 (92%)                    | 800 (92%)           | 0.961   |
| Peripheral vascular disease                                        | 37 (4%)                      | 36 (4%)             | 0.860   |
| History of myocardial infarction                                   | 118 (14%)                    | 110 (13%)           | 1.000   |
| Severe coronary artery disease                                     | 284 (33%)                    | 270 (31%)           | 0.619   |
| Stroke/transient ischemic attack                                   | 61 (7%)                      | 56 (6%)             | 0.503   |
| Valvular disease                                                   | 53 (6%)                      | 50 (6%)             | 0.702   |
| Dyslipidemia                                                       | 246 (28%)                    | 243 (28%)           | 0.915   |
| Obstructive sleep apnea                                            | 17 (2%)                      | 15 (2%)             | 0.859   |
| Chronic obstructive pulmonary disease                              | 44 (5%)                      | 41 (5%)             | 0.824   |
| Malignancy                                                         | 135 (16%)                    | 131 (15%)           | 0.824   |
| History of alcohol abuse                                           | 16 (2%)                      | 16 (2%)             | 0.842   |
| CHA <sub>2</sub> DS <sub>2</sub> -VASc Score (Interquartile range) | 3 (2-4)                      | 3 (2-4)             | 1.000   |
| Anticoagulation                                                    | 602 (69%)                    | 524 (60%)           | 0.554   |
| Beta Blocker                                                       | 665 (77%)                    | 468 (54%)           | < 0.001 |
| Digoxin                                                            | 126 (15%)                    | 93 (11%)            | < 0.001 |
| Sodium channel blockers                                            | 177 (20%)                    | 18 (2%)             | 0.021   |
| Potassium channel blockers                                         | 673 (78%)                    | 53 (6%)             | < 0.001 |
| Ablation                                                           | 92 (11%)                     | 0 (0%)              | -       |

**Supplemental Table 2:** Baseline characteristics of participants receiving early rhythm control or usual care in a propensity matched cohort.

138  
139  
140  
141

|                                  | Total Events                        |                            | Events/100 patient years      |                           |                            |
|----------------------------------|-------------------------------------|----------------------------|-------------------------------|---------------------------|----------------------------|
| <b>Outcome</b>                   | <b>Early rhythm-control (N=874)</b> | <b>Usual care (N=8817)</b> | <b>Rhythm control</b>         | <b>Usual care</b>         | <b>Absolute difference</b> |
| Stroke/TIA                       | 98                                  | 616                        | 2.43                          | 2.43                      | 0.00                       |
| Acute coronary syndrome          | 62                                  | 482                        | 1.53                          | 1.90                      | -0.36                      |
| Worsening of heart failure       | 414                                 | 2888                       | 10.25                         | 11.37                     | -1.13                      |
| <b>Propensity-score matching</b> |                                     |                            |                               |                           |                            |
|                                  | Total Events                        |                            | Events/100 patient years      |                           |                            |
| <b>Outcome</b>                   | <b>Early rhythm-control (N=868)</b> | <b>Usual care (N=868)</b>  | <b>Rhythm control (N=868)</b> | <b>Usual care (N=868)</b> | <b>Absolute difference</b> |
| Stroke/TIA                       | 94                                  | 84                         | 2.35                          | 2.47                      | -0.12                      |
| Acute coronary syndrome          | 61                                  | 67                         | 1.53                          | 1.97                      | -0.44                      |
| Worsening of heart failure       | 414                                 | 355                        | 10.35                         | 10.42                     | -0.07                      |

142 **Supplemental Table 3:** Repeated events analysis for participants receiving either early  
 143 rhythm-control or usual care.  
 144  
 145

| <b>Overall cohort</b>                |                   |                  |
|--------------------------------------|-------------------|------------------|
| <b>Disease</b>                       | <b>HR</b>         | <b>P-Value</b>   |
| Alcoholic liver disease              | 0.22 (0.03-1.62)  | 0.137            |
| Asthma                               | 0.61 (0.48-0.79)  | <b>&lt;0.001</b> |
| Bladder cancer                       | 1.33 (0.78-2.27)  | 0.301            |
| Bronchiectasis                       | 0.60 (0.35-1.02)  | 0.058            |
| Celiac disease                       | 0.59 (0.21-1.64)  | 0.313            |
| Colon cancer                         | 0.42 (0.17-1.03)  | 0.058            |
| Epilepsy                             | 0.44 (0.24-0.82)  | <b>0.009</b>     |
| Glaucoma                             | 0.74 (0.48-1.13)  | 0.158            |
| Lung cancer                          | 1.16 (0.73-1.82)  | 0.533            |
| Multiple sclerosis                   | 0.25 (0.04-1.87)  | 0.179            |
| Parkinson's disease                  | 0.74 (0.40-1.34)  | 0.312            |
| Prostate cancer                      | 0.95 (0.65-1.40)  | 0.800            |
| Psoriasis                            | 0.66 (0.34-1.26)  | 0.207            |
| Renal cancer                         | 0.84 (0.30-2.36)  | 0.733            |
| Sickle cell disease                  | 3.58 (0.32-39.59) | 0.298            |
| Diabetes mellitus II                 | 0.63 (0.52-0.76)  | <b>&lt;0.001</b> |
| Acute appendicitis                   | 0.74 (0.22-2.44)  | 0.618            |
| Benign paroxysmal positional vertigo | 0.67 (0.20-2.20)  | 0.507            |
| Chronic sinusitis                    | 0.43 (0.10-1.79)  | 0.246            |
| Frozen shoulder                      | 0.78 (0.18-3.36)  | 0.736            |
| Major fracture                       | 0.91 (0.61-1.36)  | 0.651            |
| Meniere's disease                    | 1.34 (0.39-4.68)  | 0.631            |
| Otitis media                         | 2.16 (0.70-6.71)  | 0.182            |
| <b>Propensity-score matching</b>     |                   |                  |



| Disease                              | HR                | P-Value      |
|--------------------------------------|-------------------|--------------|
| Alcoholic liver disease              | 0.85 (0.05-13.66) | 0.911        |
| Asthma                               | 0.81 (0.57-1.14)  | 0.225        |
| Bladder cancer                       | 1.99 (0.82-4.84)  | 0.129        |
| Bronchiectasis                       | 0.94 (0.46-1.96)  | 0.877        |
| Celiac disease                       | 1.71 (0.31-9.32)  | 0.537        |
| Colon cancer                         | 0.88 (0.25-3.03)  | 0.837        |
| Epilepsy                             | 0.52 (0.25-1.10)  | 0.089        |
| Glaucoma                             | 1.22 (0.66-2.27)  | 0.533        |
| Lung cancer                          | 3.24 (1.31-7.99)  | <b>0.011</b> |
| Multiple sclerosis                   | 0.29 (0.03-2.77)  | 0.281        |
| Parkinson's disease                  | 0.87 (0.39-1.94)  | 0.737        |
| Prostate cancer                      | 1.21 (0.69-2.12)  | 0.506        |
| Psoriasis                            | 1.00 (0.39-2.60)  | 0.999        |
| Renal cancer                         | 3.46(0.39-30.95)  | 0.267        |
| Sickle cell disease*                 | -                 | -            |
| Diabetes mellitus II                 | 0.94 (0.72-1.23)  | 0.660        |
| Acute appendicitis                   | 0.88 (0.18-4.37)  | 0.878        |
| Benign paroxysmal positional vertigo | 0.67 (0.15-2.97)  | 0.593        |
| Chronic sinusitis                    | 0.57 (0.01-3.39)  | 0.533        |
| Frozen shoulder                      | 1.84 (0.17-20.37) | 0.617        |
| Major fracture                       | 1.27 (0.70-2.31)  | 0.433        |
| Meniere's disease                    | 2.55 (0.27-24.56) | 0.417        |
| Otitis media*                        | -                 | -            |

146 **Supplemental Table 4:** Falsification analysis on the effect of early rhythm control on random  
147 outcomes in the overall cohort and the matched analysis. P-values < 0.05 were considered  
148 significant and marked bold. \* Insufficient number of samples for analysis.  
149

150

151 **Supplemental Figure 1:** Sensitivity analysis of the safety outcome of a composite of  
152 stroke/transient ischemic attack, all-cause death and adverse events related to rhythm  
153 control therapy of participants receiving either early rhythm-control or usual care in the  
154 overall cohort (A) and a propensity-score matched analysis (B). Shown are Hazard ratios for  
155 the composite safety outcome and for its components. Follow-up was limited to March 2020  
156 to exclude the effect of the Covid-19 pandemic.

157

158 **Supplemental Figure 2:** Sensitivity analysis of the efficacy outcome of a composite of  
159 stroke/transient ischemic attack, cardiovascular death, acute coronary syndrome and  
160 worsening of heart failure of participants receiving either early rhythm-control or usual care  
161 in the overall cohort (A) and a propensity-score matched analysis (B). The hazard ratios are  
162 presented for the composite efficacy outcome and for its components. Follow-up was  
163 limited to March 2020 to exclude the effect of the Covid-19 pandemic.

164

165 **Supplemental Figure 3:** Sensitivity analysis of the safety outcome of a composite of  
166 stroke/transient ischemic attack, all-cause death and adverse events related to rhythm  
167 control therapy of participants receiving either early rhythm-control or usual care in the  
168 overall cohort (A) and a propensity-score matched analysis (B). The hazard ratios are  
169 presented for the composite safety outcome and for its components. No participants were  
170 excluded for death within 6 months of AF diagnosis and events during those 6 months were  
171 included.

172

173 **Supplemental Figure 4:** Sensitivity analysis of the efficacy outcome of a composite of  
174 stroke/transient ischemic attack, cardiovascular death, acute coronary syndrome and  
175 worsening of heart failure of participants receiving either early rhythm-control or usual care  
176 in the overall cohort (A) and a propensity-score matched analysis (B). The hazard ratios are  
177 presented for the composite efficacy outcome and for its components. No participants were  
178 excluded for death within 6 months of AF diagnosis and events during those 6 months were  
179 included.

180

181

182

183

184

## 185 References:

- 186 1. Stuart EA. Matching methods for causal inference: A review and a look forward. *Stat*  
187 *Sci* 2010;25(1):1-21. (In eng). DOI: 10.1214/09-STS313.
- 188 2. Cohen J. *Statistical power analysis for the behavioral sciences*: Routledge, 2013.
- 189 3. Austin PC. Comparing paired vs non-paired statistical methods of analyses when  
190 making inferences about absolute risk reductions in propensity-score matched  
191 samples. *Stat Med* 2011;30(11):1292-301. (In eng). DOI: 10.1002/sim.4200.  
192
