# Supplementary material for: Eligibility for early rhythm control in patients with atrial fibrillation in the UK Biobank
Source: PubMed Central journal article supplement (PMC9664114; doi:10.1136/heartjnl-2022-321196), 2022-07-14
Supplement: heartjnl-2022-321196supp002.pdf [file heartjnl-2022-321196supp002.pdf]

| Read2                  | BNF Code       | DMD code          | Drug name                            |
|------------------------|----------------|-------------------|--------------------------------------|
| <b>Anticoagulation</b> |                |                   |                                      |
|                        | 20802          |                   | Apixaban Tablets 2.5 mg              |
|                        | 20802          |                   | Apixaban Tablets 5 mg                |
|                        |                |                   | Apixaban Tablets 5 mg                |
|                        | 50.00.00.00.00 |                   | apixaban (form not specified)        |
| bs72.                  | 2080200        |                   | Apixaban 2.5mg tablets               |
| bs72.                  |                | 703907006         | Apixaban 2.5mg tablets               |
| bs72.00                |                | 703907006         | Apixaban 2.5mg tablets               |
|                        | 02.08.02.00.00 |                   | Apixaban 2.5mg tablets               |
| bs74.                  | 2080200        |                   | Apixaban 5mg tablets                 |
| bs74.                  |                | 703908001         | Apixaban 5mg tablets                 |
| bs74.00                |                | 703908001         | Apixaban 5mg tablets                 |
|                        | 02.08.02.00.00 |                   | Apixaban 5mg tablets                 |
|                        | 20802          |                   | Dabigatran Etexilate Capsules 110 mg |
|                        | 20802          |                   | Dabigatran Etexilate Capsules 150 mg |
|                        | 20802          |                   | Dabigatran Etexilate Capsules 75 mg  |
| bs4y.                  | 2080200        |                   | Dabigatran etexilate 110mg capsules  |
| bs4y.00                |                | 13532811000001109 | Dabigatran etexilate 110mg capsules  |
|                        | 02.08.02.00.00 |                   | Dabigatran etexilate 110mg capsules  |
| bs4x.                  | 2080200        |                   | Dabigatran etexilate 150mg capsules  |
| bs4x.00                |                | 19469811000001101 | Dabigatran etexilate 150mg capsules  |
|                        | 02.08.02.00.00 |                   | Dabigatran etexilate 150mg capsules  |
| bs4z.00                |                | 13532911000001104 | Dabigatran etexilate 75mg capsules   |
|                        | 02.08.02.00.00 |                   | Dabigatran etexilate 75mg capsules   |
| bs85.00                |                | 29903311000001108 | Edoxaban 30mg tablets                |
| bs86.00                |                | 29903411000001101 | Edoxaban 60mg tablets                |
|                        | 02.08.02.00.00 |                   | Edoxaban 60mg tablets                |
|                        | 20802          |                   | Rivaroxaban Tablets 10 mg            |
|                        | 20802          |                   | Rivaroxaban Tablets 15 mg            |
|                        |                |                   | Rivaroxaban Tablets 15 mg            |
|                        | 20802          |                   | Rivaroxaban Tablets 20 mg            |
|                        |                |                   | Rivaroxaban Tablets 20 mg            |
|                        | 50.00.00.00.00 |                   | rivaroxaban (form not specified)     |
| bs6z.                  | 2080200        |                   | Rivaroxaban 10mg tablets             |
| bs6z.00                |                | 14254711000001104 | Rivaroxaban 10mg tablets             |
|                        | 02.08.02.00.00 |                   | Rivaroxaban 10mg tablets             |
| bs6y.                  | 2080200        |                   | Rivaroxaban 15mg tablets             |
| bs6y.                  |                | 19842111000001101 | Rivaroxaban 15mg tablets             |
| bs6y.00                |                | 19842111000001101 | Rivaroxaban 15mg tablets             |
|                        | 02.08.02.00.00 |                   | Rivaroxaban 15mg tablets             |

|         |                |                    |                                                    |
|---------|----------------|--------------------|----------------------------------------------------|
| bs6w.   | 2080200        |                    | Rivaroxaban 2.5mg tablets                          |
| bs6w.00 |                | 27810711000001104  | Rivaroxaban 2.5mg tablets                          |
|         | 02.08.02.00.00 |                    | Rivaroxaban 2.5mg tablets                          |
| bs6x.   | 2080200        |                    | Rivaroxaban 20mg tablets                           |
| bs6x.   |                | 19842211000001107  | Rivaroxaban 20mg tablets                           |
| bs6x.00 |                | 19842211000001107  | Rivaroxaban 20mg tablets                           |
|         | 02.08.02.00.00 |                    | Rivaroxaban 20mg tablets                           |
| bs6z.00 |                | 14254711000001104  | RIVAROXABAN FC tab 10mg                            |
|         |                | 299275001000027104 | WARFARIN                                           |
| bs17.00 |                | 319733000          | WARFARIN 1MG                                       |
|         |                | 32095001000027107  | Warfarin 1mg Tablet (WB Pharmaceuticals Ltd)       |
| bs17.   | 2080200        |                    | Warfarin 1mg tablets                               |
| bs17.00 |                | 319733000          | Warfarin 1mg tablets                               |
| bs17.00 |                | 319733000          | WARFARIN 1mg tablets                               |
|         | 02.08.02.00.00 |                    | Warfarin 1mg tablets                               |
|         |                | 299275001000027104 | WARFARIN 1mg tablets                               |
|         | 02.08.02.00.00 |                    | Warfarin 1mg tablets (A A H Pharmaceuticals Ltd)   |
|         | 02.08.02.00.00 |                    | Warfarin 1mg tablets (Actavis UK Ltd)              |
|         | 02.08.02.00.00 |                    | Warfarin 1mg tablets (Almus Pharmaceuticals Ltd)   |
|         | 02.08.02.00.00 |                    | Warfarin 1mg tablets (Arrow Generics Ltd)          |
|         |                | 2.72711E+14        | Warfarin 1mg tablets (IVAX Pharmaceuticals UK Ltd) |
|         | 02.08.02.00.00 |                    | Warfarin 1mg tablets (Sandoz Ltd)                  |
|         | 02.08.02.00.00 |                    | Warfarin 1mg tablets (Teva UK Ltd)                 |
|         | 02.08.02.00.00 |                    | Warfarin 1mg/ml oral suspension sugar free         |
|         |                | 32105001000027102  | Warfarin 3mg Tablet (WB Pharmaceuticals Ltd)       |
| bs18.   | 2080200        |                    | Warfarin 3mg tablets                               |
| bs18.   |                | 319734006          | Warfarin 3mg tablets                               |
| bs18.   |                | 319734006          | WARFARIN 3mg tablets                               |
| bs18.   |                | 319734006          | WARFARIN 3MG TABLETS                               |
| bs18.00 |                | 319734006          | Warfarin 3mg tablets                               |
|         | 02.08.02.00.00 |                    | Warfarin 3mg tablets                               |
|         | 02.08.02.00.00 |                    | Warfarin 3mg tablets (A A H Pharmaceuticals Ltd)   |
| bs18.00 |                | 5.55911E+14        | Warfarin 3mg tablets (Actavis UK Ltd)              |
|         | 02.08.02.00.00 |                    | Warfarin 3mg tablets (Actavis UK Ltd)              |
|         | 02.08.02.00.00 |                    | Warfarin 3mg tablets (Almus Pharmaceuticals Ltd)   |
|         | 02.08.02.00.00 |                    | Warfarin 3mg tablets (Arrow Generics Ltd)          |
|         | 02.08.02.00.00 |                    | Warfarin 3mg tablets (IVAX Pharmaceuticals UK Ltd) |
|         |                | 9.27211E+14        | Warfarin 3mg tablets (IVAX Pharmaceuticals UK Ltd) |
|         | 02.08.02.00.00 |                    | Warfarin 3mg tablets (Sandoz Ltd)                  |
|         | 02.08.02.00.00 |                    | Warfarin 3mg tablets (Teva UK Ltd)                 |
| bs1..   |                | 8798511000001101   | Warfarin 3mg/5ml oral solution                     |

|         |                 |                    |                                                           |
|---------|-----------------|--------------------|-----------------------------------------------------------|
|         | 02.08.02.00.00  |                    | Warfarin 3mg/5ml oral solution                            |
| bs1A.   | 2080200         |                    | Warfarin 500microgram tablets                             |
| bs1A.00 |                 | 319736008          | Warfarin 500microgram tablets                             |
|         | 02.08.02.00.00  |                    | Warfarin 500microgram tablets                             |
|         | 02.08.02.00.00  |                    | Warfarin 500microgram tablets (A A H Pharmaceuticals Ltd) |
|         | 02.08.02.00.00  |                    | Warfarin 500microgram tablets (Actavis UK Ltd)            |
| bs19.00 |                 | 319735007          | WARFARIN 5MG                                              |
| bs19.   | 2080200         |                    | Warfarin 5mg tablets                                      |
| bs19.00 |                 | 319735007          | Warfarin 5mg tablets                                      |
| bs19.00 |                 | 319735007          | WARFARIN 5mg tablets                                      |
|         | 02.08.02.00.00  |                    | Warfarin 5mg tablets                                      |
|         | 02.08.02.00.00  |                    | Warfarin 5mg tablets (A A H Pharmaceuticals Ltd)          |
|         | 02.08.02.00.00  |                    | Warfarin 5mg tablets (Actavis UK Ltd)                     |
|         | 02.08.02.00.00  |                    | Warfarin 5mg tablets (Almus Pharmaceuticals Ltd)          |
|         | 02.08.02.00.00  |                    | Warfarin 5mg tablets (Arrow Generics Ltd)                 |
|         |                 | 7.29811E+14        | Warfarin 5mg tablets (IVAX Pharmaceuticals UK Ltd)        |
|         | 02.08.02.00.00  |                    | Warfarin 5mg tablets (Teva UK Ltd)                        |
|         | 02.08.02.00.00  |                    | Warfarin 5mg tablets (Zentiva)                            |
| bs1..   |                 | 8798711000001106   | Warfarin 5mg/5ml oral solution                            |
| bs17.00 |                 | 319733000          | WARFARIN SOD TAB 1MG                                      |
|         |                 | 299275001000027104 | WARFARIN SOD TAB 1MG                                      |
| bs18.   |                 | 319734006          | WARFARIN SOD TAB 3MG                                      |
|         |                 | 299275001000027104 | WARFARIN SOD TAB 3MG                                      |
| bs19.00 |                 | 319735007          | WARFARIN SOD TAB 5MG                                      |
|         |                 | 299275001000027104 | WARFARIN SOD TAB 5MG                                      |
| bs17.00 |                 | 319733000          | WARFARIN SODIUM                                           |
| bs18.   |                 | 319734006          | WARFARIN SODIUM                                           |
|         |                 | 299275001000027104 | WARFARIN SODIUM                                           |
|         | 20802           |                    | Warfarin Sodium Oral solution 1 mg/5 ml                   |
|         | 20802           |                    | Warfarin Sodium Oral solution 3 mg/5 ml                   |
| bs17.00 |                 | 319733000          | Warfarin Sodium Tablets 1 mg                              |
|         | 0208020V0AAAAAA |                    | Warfarin Sodium Tablets 1 mg                              |
| bs18.   |                 | 319734006          | Warfarin Sodium Tablets 3 mg                              |
| bs18.00 |                 | 319734006          | Warfarin Sodium Tablets 3 mg                              |
|         | 0208020V0AAABAB |                    | Warfarin Sodium Tablets 3 mg                              |
| bs19.00 |                 | 319735007          | Warfarin Sodium Tablets 5 mg                              |
|         | 0208020V0AADAD  |                    | Warfarin Sodium Tablets 5 mg                              |
|         | 20802           |                    | Warfarin Sodium Tablets 500 micrograms                    |
| bs17.00 |                 | 319733000          | Warfarin sodium 1 mg tablets                              |
|         |                 | 299275001000027104 | WARFARIN SODIUM 1MG                                       |
| bs17.00 |                 | 319733000          | WARFARIN SODIUM 1mg tablets                               |

|         |                 |                    |                                                   |
|---------|-----------------|--------------------|---------------------------------------------------|
|         |                 | 299275001000027104 | WARFARIN SODIUM 1mg tablets                       |
|         |                 | 299275001000027104 | WARFARIN SODIUM 3MG TAB                           |
| bs18.   |                 | 319734006          | WARFARIN SODIUM 3mg tablets                       |
|         |                 | 299275001000027104 | WARFARIN SODIUM 3mg tablets                       |
|         |                 | 299275001000027104 | WARFARIN SODIUM 5mg tablets                       |
| bs1..   |                 | 8798511000001101   | WARFARIN SODIUM oral liq 3mg/5ml                  |
|         | 02.08.02.00.00  |                    | warfarin sodium oral suspension 5mg/5ml           |
|         | 02.08.02.00.00  |                    | warfarin sodium oral suspension sugar-free 1mg/ml |
| bs17.00 |                 | 319733000          | Warfarin Sodium Tablets 1 mg                      |
|         |                 | 299275001000027104 | warfarin sodium tablets 1 mg                      |
| bs17.00 |                 | 319733000          | warfarin sodium tablets 1mg                       |
| bs17.00 |                 | 319733000          | Warfarin sodium tablets 1mg                       |
| bs17.00 |                 | 319733000          | Warfarin Sodium Tablets 1mg                       |
| bs17.00 |                 | 319733000          | WARFARIN SODIUM tablets 1mg                       |
|         | 0208020V0AAAAAA |                    | Warfarin Sodium TABLETS 1MG                       |
|         | 0208020V0AAAAAA |                    | WARFARIN SODIUM TABLETS 1MG                       |
| bs18.   |                 | 319734006          | Warfarin Sodium Tablets 3 mg                      |
| bs18.   |                 | 319734006          | Warfarin sodium tablets 3mg                       |
| bs18.   |                 | 319734006          | WARFARIN SODIUM tablets 3mg                       |
|         | 0208020V0AAABAB |                    | Warfarin Sodium TABLETS 3MG                       |
|         | 0208020V0AAABAB |                    | WARFARIN SODIUM TABLETS 3MG                       |
|         |                 | 299275001000027104 | warfarin sodium tablets 3mg                       |
| bs19.00 |                 | 319735007          | Warfarin Sodium Tablets 5 mg                      |
|         |                 | 299275001000027104 | warfarin sodium tablets 5 mg                      |
| bs1A.00 |                 | 319736008          | warfarin sodium tablets 500 micrograms            |
|         | 20802           |                    | WARFARIN SODIUM TABLETS 500MICROGRAMS             |
| bs19.00 |                 | 319735007          | Warfarin sodium tablets 5mg                       |
| bs19.00 |                 | 319735007          | Warfarin Sodium Tablets 5mg                       |
| bs19.00 |                 | 319735007          | WARFARIN SODIUM tablets 5mg                       |
|         | 0208020V0AADAD  |                    | Warfarin Sodium TABLETS 5MG                       |
|         | 0208020V0AADAD  |                    | WARFARIN SODIUM TABLETS 5MG                       |
|         |                 | 299275001000027104 | WARFARIN SODIUM Tabs                              |
| bs17.00 |                 | 319733000          | WARFARIN SODIUM tabs 1 mg                         |
|         |                 | 299275001000027104 | WARFARIN SODIUM tabs 1 mg                         |
| bs17.   | 2080200         |                    | WARFARIN SODIUM tabs 1mg                          |
| bs17.00 |                 | 319733000          | WARFARIN SODIUM tabs 1mg                          |
| bs17.00 |                 | 319733000          | WARFARIN SODIUM TABS 1MG                          |
|         | 0208020V0AAAAAA |                    | Warfarin Sodium TABS 1MG                          |
|         |                 | 299275001000027104 | WARFARIN SODIUM tabs 3 mg                         |
| bs18.   | 2080200         |                    | WARFARIN SODIUM tabs 3mg                          |
| bs18.   |                 | 319734006          | WARFARIN SODIUM tabs 3mg                          |

|         |                 |                    |                                          |
|---------|-----------------|--------------------|------------------------------------------|
| bs18.   |                 | 319734006          | WARFARIN SODIUM TABS 3MG                 |
| bs18.00 |                 | 319734006          | WARFARIN SODIUM tabs 3mg                 |
|         | 0208020V0AAABAB |                    | Warfarin Sodium TABS 3MG                 |
|         |                 | 299275001000027104 | WARFARIN SODIUM TABS 3MG                 |
|         |                 | 299275001000027104 | WARFARIN SODIUM tabs 5 mg                |
| bs1A.   | 2080200         |                    | WARFARIN SODIUM tabs 500 micrograms      |
| bs1A.00 |                 | 319736008          | WARFARIN SODIUM tabs 500 micrograms      |
|         | 20802           |                    | Warfarin Sodium TABS 500MICROGRAMS       |
| bs19.   | 2080200         |                    | WARFARIN SODIUM tabs 5mg                 |
| bs19.00 |                 | 319735007          | WARFARIN SODIUM tabs 5mg                 |
| bs19.00 |                 | 319735007          | WARFARIN SODIUM TABS 5MG                 |
|         | 0208020V0AAADAD |                    | Warfarin Sodium TABS 5MG                 |
|         |                 | 299275001000027104 | WARFARIN SODIUM TABS 5MG                 |
| bs17.00 |                 | 319733000          | WARFARIN TAB 1                           |
| bs17.00 |                 | 319733000          | WARFARIN TAB 1mg                         |
| bs18.   |                 | 319734006          | WARFARIN TAB 3                           |
| bs18.   |                 | 319734006          | WARFARIN TAB 3mg                         |
| bs19.00 |                 | 319735007          | WARFARIN TAB 5                           |
| bs19.00 |                 | 319735007          | WARFARIN TAB 5mg                         |
| bs17.00 |                 | 319733000          | Warfarin Tablets 1 mg                    |
| bs17.00 |                 | 319733000          | Warfarin tablets 1mg                     |
|         |                 | 32095001000027107  | Warfarin tablets 1mg                     |
|         | 02.08.02.00.00  |                    | WARFARIN tablets 1mg [AMCO]              |
| bs18.   |                 | 319734006          | Warfarin Tablets 3 mg                    |
| bs18.   |                 | 319734006          | Warfarin tablets 3mg                     |
| bs18.00 |                 | 319734006          | Warfarin tablets 3mg                     |
|         |                 | 299275001000027104 | Warfarin tablets 3mg                     |
|         |                 | 32105001000027102  | Warfarin tablets 3mg                     |
| bs19.00 |                 | 319735007          | Warfarin tablets 5mg                     |
|         |                 | 299275001000027104 | Warfarin tablets 5mg                     |
|         |                 | 2.72711E+14        | WARFARIN tabs 1mg [IVAX]                 |
|         |                 | 9.27211E+14        | WARFARIN tabs 3mg [IVAX]                 |
|         |                 | 32105001000027102  | WARFARIN tabs 3mg [WB]                   |
|         |                 | 3659711000001104   | WARFARIN tabs 500 micrograms [HILLCROSS] |
| bs14.00 |                 | 36055001000027102  | WARFARIN WBP 1mg tabs                    |
| bs16.00 |                 | 36075001000027104  | WARFARIN WBP 5mg tabs                    |
| bs17.00 |                 | 319733000          | WARFARIN WBP TABLETS 1 MG                |
|         | 02.08.02.00.00  |                    | WARFARIN WBP tablets 1mg [BOEH I HSP]    |
| bs18.   |                 | 319734006          | WARFARIN WBP TABLETS 3 MG                |
|         | 02.08.02.00.00  |                    | WARFARIN WBP tablets 3mg [BOEH I HSP]    |
|         | 02.08.02.00.00  |                    | WARFARIN WBP tablets 5mg [BOEH I HSP]    |

| Heart failure |                 |  |                                                                      |
|---------------|-----------------|--|----------------------------------------------------------------------|
|               | 02.05.05.01.00  |  | Acepril 12.5mg tablets (Bristol-Myers Squibb Pharmaceuticals Ltd)    |
|               | 02.05.05.01.00  |  | Acepril 25mg tablets (Bristol-Myers Squibb Pharmaceuticals Ltd)      |
|               | 02.05.05.01.00  |  | Acepril 50mg tablets (Bristol-Myers Squibb Pharmaceuticals Ltd)      |
|               | 02.05.05.01.00  |  | Acezide 25mg/50mg tablets (Bristol-Myers Squibb Pharmaceuticals Ltd) |
|               | 02.02.03.00.00  |  | Aldactide 25 tablets (Pfizer Ltd)                                    |
|               | 02.02.01.00.00  |  | Aldactide 50 tablets (Pfizer Ltd)                                    |
|               | 0202040G0BBABAB |  | ALDACTIDE 50-P42 tablet                                              |
|               | 0202040G0BBABAB |  | ALDACTIDE 50-P42 TABLET                                              |
|               | 02.02.03.00.00  |  | Aldactone 100mg tablets (Pfizer Ltd)                                 |
|               | 02.02.03.00.00  |  | Aldactone 25mg tablets (Pfizer Ltd)                                  |
|               | 02.02.03.00.00  |  | Aldactone 50mg tablets (Pfizer Ltd)                                  |
| bk78.         | 02050502        |  | Amias 16mg tablets (Takeda UK Ltd)                                   |
|               | 02.05.05.02.00  |  | Amias 16mg tablets (Takeda UK Ltd)                                   |
|               | 02.05.05.02.00  |  | Amias 2mg tablets (Takeda UK Ltd)                                    |
|               | 02.05.05.02.00  |  | Amias 32mg tablets (Takeda UK Ltd)                                   |
|               | 02.05.05.02.00  |  | Amias 4mg tablets (Takeda UK Ltd)                                    |
| bk77.         | 02050502        |  | Amias 8mg tablets (Takeda UK Ltd)                                    |
|               | 02.05.05.02.00  |  | Amias 8mg tablets (Takeda UK Ltd)                                    |
|               | 0205052C0BBABAB |  | Amias TABS 4MG                                                       |
|               | 02.02.03.00.00  |  | Amil-Co 5mg/50mg tablets (IVAX Pharmaceuticals UK Ltd)               |
|               | 0205052I0BBABAB |  | Aprovel Tablets 150 mg                                               |
|               | 0205052I0BBAAAA |  | Aprovel Tablets 75 mg                                                |
|               | 0205052I0BBABAB |  | APROVEL 150MG                                                        |
| bk55.         | 02050502        |  | Aprovel 150mg tablets (Sanofi)                                       |
|               | 02.05.05.02.00  |  | Aprovel 150mg tablets (Sanofi)                                       |
| bk56.         | 02050502        |  | Aprovel 300mg tablets (Sanofi)                                       |
|               | 02.05.05.02.00  |  | Aprovel 300mg tablets (Sanofi)                                       |
| bk54.         | 02050502        |  | Aprovel 75mg tablets (Sanofi)                                        |
|               | 02.05.05.02.00  |  | Aprovel 75mg tablets (Sanofi)                                        |
|               | 0202020D0AAAEAE |  | Bumetanide Tablets 1 mg                                              |
|               | 0202020D0AAAFAP |  | Bumetanide Tablets 5 mg                                              |
| b32u.         | 02020200        |  | Bumetanide 1mg tablets                                               |
|               | 02.02.02.00.00  |  | Bumetanide 1mg tablets                                               |
|               | 02.02.02.00.00  |  | Bumetanide 1mg tablets (Actavis UK Ltd)                              |
|               | 02.02.02.00.00  |  | Bumetanide 1mg tablets (Almus Pharmaceuticals Ltd)                   |
|               | 02.02.02.00.00  |  | Bumetanide 1mg tablets (Mylan Ltd)                                   |
|               | 02.02.02.00.00  |  | Bumetanide 1mg tablets (Niche Generics Ltd)                          |
|               | 02.02.02.00.00  |  | Bumetanide 1mg tablets (Teva UK Ltd)                                 |

|       |                 |  |                                                                                                 |
|-------|-----------------|--|-------------------------------------------------------------------------------------------------|
|       | 02.02.02.00.00  |  | Bumetanide 1mg/5ml oral solution sugar free                                                     |
|       | 02.02.08.00.00  |  | Bumetanide 500microgram / Potassium chloride 573mg (potassium 7.7mmol) modified-release tablets |
| b32v. | 02020200        |  | Bumetanide 5mg tablets                                                                          |
|       | 02.02.02.00.00  |  | Bumetanide 5mg tablets                                                                          |
|       | 020208          |  | Bumetanide And Slow Potassium BP Tablets 500 micrograms + 7.7 mmol                              |
|       | 0202020D0AAAEAE |  | BUMETANIDE TABLETS 1MG                                                                          |
|       | 0202020D0AAAEAE |  | Bumetanide TABS 1MG                                                                             |
|       | 0202020D0AAAFAF |  | Bumetanide TABS 5MG                                                                             |
|       | 02.02.02.00.00  |  | Burinex 1mg tablets (LEO Pharma)                                                                |
|       | 02.02.02.00.00  |  | Burinex 5mg tablets (LEO Pharma)                                                                |
|       | 02.02.02.00.00  |  | Burinex A 5mg/1mg tablets (LEO Pharma)                                                          |
|       | 0202080C0BBAAAA |  | Burinex K Tablets                                                                               |
|       | 02.02.08.00.00  |  | Burinex K modified-release tablets (LEO Pharma)                                                 |
|       | 0202080C0BBAAAA |  | BURINEX K TABLETS                                                                               |
|       | 0202080C0BBAAAA |  | Burinex K TABS                                                                                  |
|       | 0202080C0BBAAAA |  | Burinex k-P42 tablet                                                                            |
|       | 0202080C0BBAAAA |  | BURINEX K-P42 TABLET                                                                            |
|       | 0202080C0BBAAAA |  | BURINEX K-P42 tabs                                                                              |
|       | 02.02.02.00.00  |  | BURINEX oral liquid sugar-free 1mg/5ml [LEO]                                                    |
| bk74. | 02050502        |  | Candesartan 16mg tablets                                                                        |
|       | 02.05.05.02.00  |  | Candesartan 16mg tablets                                                                        |
|       | 02.05.05.02.00  |  | Candesartan 16mg tablets (Actavis UK Ltd)                                                       |
|       | 02.05.05.02.00  |  | Candesartan 16mg tablets (Teva UK Ltd)                                                          |
| bk71. | 02050502        |  | Candesartan 2mg tablets                                                                         |
|       | 02.05.05.02.00  |  | Candesartan 2mg tablets                                                                         |
|       | 02.05.05.02.00  |  | Candesartan 2mg tablets (Teva UK Ltd)                                                           |
| bk7z. | 02050502        |  | Candesartan 32mg tablets                                                                        |
|       | 02.05.05.02.00  |  | Candesartan 32mg tablets                                                                        |
|       | 02.05.05.02.00  |  | Candesartan 32mg tablets (Actavis UK Ltd)                                                       |
|       | 02.05.05.02.00  |  | Candesartan 32mg tablets (Teva UK Ltd)                                                          |
| bk72. | 02050502        |  | Candesartan 4mg tablets                                                                         |
|       | 02.05.05.02.00  |  | Candesartan 4mg tablets                                                                         |
|       | 02.05.05.02.00  |  | Candesartan 4mg tablets (Actavis UK Ltd)                                                        |
|       | 02.05.05.02.00  |  | Candesartan 4mg tablets (Teva UK Ltd)                                                           |
| bk73. | 02050502        |  | Candesartan 8mg tablets                                                                         |
|       | 02.05.05.02.00  |  | Candesartan 8mg tablets                                                                         |
|       | 02.05.05.02.00  |  | Candesartan 8mg tablets (Actavis UK Ltd)                                                        |
|       | 02.05.05.02.00  |  | Candesartan 8mg tablets (Teva UK Ltd)                                                           |
|       | 0205052C0AAADAD |  | Candesartan Cilexetil Tablets 16 mg                                                             |
|       | 0205052C0AAAAAA |  | Candesartan Cilexetil Tablets 2 mg                                                              |

|       |                 |  |                                                                            |
|-------|-----------------|--|----------------------------------------------------------------------------|
|       | 02050502        |  | Candesartan Cilexetil Tablets 32 mg                                        |
|       | 0205052C0AAABAB |  | Candesartan Cilexetil Tablets 4 mg                                         |
|       | 0205052C0AAACAC |  | Candesartan Cilexetil Tablets 8 mg                                         |
| bk74. | 02050502        |  | Candesartan Cilexetil Tablets 16mg                                         |
|       | 0205052C0AAADAD |  | Candesartan Cilexetil TABLETS 16MG                                         |
|       | 0205052C0AAADAD |  | CANDESARTAN CILEXETIL TABLETS 16MG                                         |
|       | 0205052C0AAAAAA |  | Candesartan Cilexetil TABLETS 2MG                                          |
|       | 0205052C0AAAAAA |  | CANDESARTAN CILEXETIL TABLETS 2MG                                          |
|       | 02050502        |  | CANDESARTAN CILEXETIL TABLETS 32MG                                         |
|       | 0205052C0AAABAB |  | Candesartan Cilexetil TABLETS 4MG                                          |
|       | 0205052C0AAABAB |  | CANDESARTAN CILEXETIL TABLETS 4MG                                          |
|       | 0205052C0AAACAC |  | CANDESARTAN CILEXETIL TABLETS 8MG                                          |
|       | 0205052C0AAADAD |  | Candesartan Cilexetil TABS 16MG                                            |
|       | 0205052C0AAAAAA |  | Candesartan Cilexetil TABS 2MG                                             |
|       | 02050502        |  | Candesartan Cilexetil TABS 32MG                                            |
|       | 0205052C0AAABAB |  | Candesartan Cilexetil TABS 4MG                                             |
|       | 0205052C0AAACAC |  | Candesartan Cilexetil TABS 8MG                                             |
|       | 0205052C0AAABAB |  | CANDESARTAN TABLETS 4MG                                                    |
| bk74. | 02050502        |  | CANDESARTAN tabs 16mg                                                      |
| bk71. | 02050502        |  | CANDESARTAN tabs 2mg                                                       |
| bk7z. | 02050502        |  | CANDESARTAN tabs 32mg                                                      |
| bk72. | 02050502        |  | CANDESARTAN tabs 4mg                                                       |
| bk73. | 02050502        |  | CANDESARTAN tabs 8mg                                                       |
|       | 02.05.05.02.00  |  | candesartan with hydrochlorothiazide (roi) tablets 16mg + 12.5mg           |
|       | 02.05.05.01.00  |  | Capoten 12.5mg tablets (Bristol-Myers Squibb Pharmaceuticals Ltd)          |
|       | 02.05.05.01.00  |  | Capoten 25mg tablets (Bristol-Myers Squibb Pharmaceuticals Ltd)            |
|       | 02.05.05.01.00  |  | Capoten 50mg tablets (Bristol-Myers Squibb Pharmaceuticals Ltd)            |
|       | 0205051F0BCABAE |  | CAPOTEN-P42 25MG TABLET                                                    |
| bi1s. | 02050501        |  | Capozide 25mg/50mg tablets (Bristol-Myers Squibb Pharmace...               |
|       | 02.02.01.00.00  |  | Capozide 25mg/50mg tablets (Bristol-Myers Squibb Pharmaceuticals Ltd)      |
|       | 02.05.05.01.00  |  | Capozide LS 12.5mg/25mg tablets (Bristol-Myers Squibb Pharmaceuticals Ltd) |
|       | 02.05.05.01.00  |  | CAPOZIDE LS tablets [SQUIBB]                                               |
|       | 0205051F0AADAD  |  | Captopril Tablets 12.5 mg                                                  |
|       | 0205051F0AAAEAE |  | Captopril Tablets 25 mg                                                    |
|       | 0205051F0AAAF   |  | Captopril Tablets 50 mg                                                    |
| bi1v. | 02050501        |  | Captopril 12.5mg tablets                                                   |
|       | 02.05.05.01.00  |  | Captopril 12.5mg tablets                                                   |



|       |                  |  |                                                                 |
|-------|------------------|--|-----------------------------------------------------------------|
| bi1x. | 02050501         |  | Captopril 25mg tablets                                          |
|       | 02.05.05.01.00   |  | Captopril 25mg tablets                                          |
| bi1z. | 02050501         |  | Captopril 50mg tablets                                          |
|       | 02.05.05.01.00   |  | Captopril 50mg tablets                                          |
|       | 0205051F0AAADAD  |  | CAPTOPRIL TABLETS 12.5MG                                        |
|       | 0205051F0AAAEAE  |  | CAPTOPRIL TABLETS 25MG                                          |
|       | 0205051F0AAAF AF |  | CAPTOPRIL TABLETS 50MG                                          |
|       | 0205051F0AAADAD  |  | Captopril TABS 12.5MG                                           |
|       | 0205051F0AAAEAE  |  | Captopril TABS 25MG                                             |
|       | 0205051F0AAAF AF |  | Captopril TABS 50MG                                             |
|       | 0205051F0AAAEAE  |  | CAPTOPRIL-P42 25MG TABLET                                       |
|       | 0205051K0BCABAB  |  | CARACE 10 PLUS TABLETS                                          |
|       | 02.02.01.00.00   |  | CARACE 10 plus tablets [BMS]                                    |
|       | 02.05.05.01.00   |  | Carace 10mg tablets (Bristol-Myers Squibb Pharmaceuticals Ltd)  |
|       | 02.05.05.01.00   |  | Carace 2.5mg tablets (Bristol-Myers Squibb Pharmaceuticals Ltd) |
|       | 0205051K0BCAAAA  |  | CARACE 20 PLUS TABLETS                                          |
|       | 02.02.01.00.00   |  | Carace 20 Plus tablets (Merck Sharp & Dohme Ltd)                |
|       | 02.02.01.00.00   |  | CARACE 20 plus tablets [BMS]                                    |
|       | 02.05.05.01.00   |  | Carace 20mg tablets (Bristol-Myers Squibb Pharmaceuticals Ltd)  |
|       | 02.05.05.01.00   |  | Carace 5mg tablets (Bristol-Myers Squibb Pharmaceuticals Ltd)   |
|       | 0205051L0BCACAC  |  | Carace TABS 10MG                                                |
|       | 0205051L0BCABAB  |  | Carace TABS 5MG                                                 |
|       | 0205051L0BCABAB  |  | Carace-P42 5mg tablet                                           |
|       | 0202010D0AAAF AF |  | Chlorothiazide TABS 500MG                                       |
|       | 020201           |  | Chlortalidone Tablets 50 mg                                     |
| b23y. | 02020100         |  | Chlortalidone 50mg tablets                                      |
|       | 02.02.01.00.00   |  | Chlortalidone 50mg tablets                                      |
|       | 02.02.01.00.00   |  | Chlortalidone 50mg tablets (Sovereign Medical Ltd)              |
|       | 020201           |  | CHLORTALIDONE TABLETS 50MG                                      |
|       | 020201           |  | Chlortalidone TABS 50MG                                         |
|       | 02.05.05.01.00   |  | Cilazapril 1mg tablets                                          |
|       | 02.05.05.01.00   |  | Cilazapril 2.5mg tablets                                        |
|       | 02.05.05.01.00   |  | Cilazapril 500microgram tablets                                 |
|       | 02.05.05.01.00   |  | Cilazapril 5mg tablets                                          |
|       | 0202040B0AAACAC  |  | Co-Amilofruse 10/80 Tablets                                     |
| b51z. | 02020400         |  | Co-amilofruse 10mg/80mg tablets                                 |
|       | 02.02.04.00.00   |  | Co-amilofruse 10mg/80mg tablets                                 |
|       | 0202040B0AAACAC  |  | Co-Amilofruse 10mg/80mg TABS                                    |
|       | 0202040B0AAABAB  |  | Co-Amilofruse 2.5/20 Tablets                                    |

|       |                 |  |                                                                  |
|-------|-----------------|--|------------------------------------------------------------------|
| b51x. | 02020400        |  | Co-amilofruse 2.5mg/20mg tablets                                 |
|       | 02.02.02.00.00  |  | Co-amilofruse 2.5mg/20mg tablets                                 |
|       | 0202040B0AAABAB |  | Co-Amilofruse 2.5mg/20mg TABS                                    |
|       | 0202040B0AAAAAA |  | Co-Amilofruse 5/40 Tablets                                       |
| b51y. | 02020400        |  | Co-amilofruse 5mg/40mg tablets                                   |
|       | 02.02.04.00.00  |  | Co-amilofruse 5mg/40mg tablets                                   |
|       | 0202040B0AAAAAA |  | CO-AMILOFRUSE 5MG/40MG TABLETS                                   |
|       | 02.02.03.00.00  |  | Co-amilofruse 5mg/40mg tablets (Actavis UK Ltd)                  |
|       | 02.02.02.00.00  |  | Co-amilofruse 5mg/40mg tablets (Mylan Ltd)                       |
|       | 02.02.03.00.00  |  | Co-amilofruse 5mg/40mg tablets (Teva UK Ltd)                     |
|       | 02.02.02.00.00  |  | Co-amilofruse 5mg/40mg tablets (Wockhardt UK Ltd)                |
|       | 0202040B0AAAAAA |  | Co-Amilofruse 5mg/40mg TABS                                      |
|       | 02050502        |  | Coaprovel Tablets 300 mg + 25 mg                                 |
|       | 02050502        |  | COAPROVEL 150MG/12.5MG TABLETS                                   |
| bk57. | 02050504        |  | CoAprovel 150mg/12.5mg tablets (Sanofi)                          |
|       | 02.05.05.02.00  |  | CoAprovel 150mg/12.5mg tablets (Sanofi)                          |
| bk58. | 02050504        |  | CoAprovel 300mg/12.5mg tablets (Sanofi)                          |
|       | 02.05.05.02.00  |  | CoAprovel 300mg/12.5mg tablets (Sanofi)                          |
| bk59. | 02050504        |  | CoAprovel 300mg/25mg tablets (Sanofi)                            |
|       | 02.02.01.00.00  |  | CoAprovel 300mg/25mg tablets (Sanofi)                            |
|       | 02050502        |  | Coaprovel 300mg/25mg TABS                                        |
|       | 02050502        |  | Co-Diovan Tablets 160 mg/12.5 mg                                 |
|       | 02050502        |  | Co-Diovan Tablets 80 mg/12.5 mg                                  |
|       | 02050502        |  | CO-DIOVAN 160MG/12.5MG TABLETS                                   |
| bk47. | 02050502        |  | Co-Diovan 160mg/12.5mg tablets (Novartis Pharmaceuticals ...     |
| bk47. | 02050504        |  | Co-Diovan 160mg/12.5mg tablets (Novartis Pharmaceuticals ...     |
|       | 02.02.01.00.00  |  | Co-Diovan 160mg/12.5mg tablets (Novartis Pharmaceuticals UK Ltd) |
|       | 02.02.01.00.00  |  | Co-Diovan 160mg/25mg tablets (Novartis Pharmaceuticals UK Ltd)   |
| bk49. | 02050504        |  | Co-Diovan 80mg/12.5mg tablets (Novartis Pharmaceuticals U...     |
|       | 02.02.01.00.00  |  | Co-Diovan 80mg/12.5mg tablets (Novartis Pharmaceuticals UK Ltd)  |
|       | 02050502        |  | CO-DIOVAN TABLETS 80/12.5MG                                      |
|       | 02.02.04.00.00  |  | Co-flumactone 25mg/25mg tablets                                  |
|       | 0202040G0AAAAAA |  | Co-Flumactone 25mg/25mg TABS                                     |
|       | 0202040G0AAABAB |  | Co-Flumactone 50/50 Tablets                                      |
|       | 02.02.03.00.00  |  | Co-flumactone 50mg/50mg tablets                                  |
|       | 0202040G0AAABAB |  | Co-Flumactone 50mg/50mg TABS                                     |
|       | 02.02.01.00.00  |  | Co-tenidone 50mg/12.5mg tablets                                  |
|       | 02.02.01.00.00  |  | Co-tenidone 50mg/12.5mg tablets (Actavis UK Ltd)                 |

|       |                 |  |                                                                      |
|-------|-----------------|--|----------------------------------------------------------------------|
|       | 02.05.05.01.00  |  | Coversyl 2mg tablets (Servier Laboratories Ltd)                      |
|       | 02.05.05.01.00  |  | Coversyl 4mg tablets (Servier Laboratories Ltd)                      |
|       | 02.05.05.01.00  |  | Coversyl 8mg tablets (Servier Laboratories Ltd)                      |
|       | 02.05.05.01.00  |  | Coversyl Arginine 10mg tablets (Servier Laboratories Ltd)            |
|       | 02.05.05.01.00  |  | Coversyl Arginine 2.5mg tablets (Servier Laboratories Ltd)           |
|       | 02.05.05.01.00  |  | Coversyl Arginine 5mg tablets (Servier Laboratories Ltd)             |
|       | 02050501        |  | Coversyl Arginine Plus Tablets 5 mg + 1.25 mg                        |
|       | 02.05.05.01.00  |  | Coversyl Arginine Plus 5mg/1.25mg tablets (Servier Laboratories Ltd) |
|       | 02050501        |  | Coversyl Plus Tablets                                                |
|       | 02.05.05.01.00  |  | Coversyl Plus tablets (Servier Laboratories Ltd)                     |
|       | 02050501        |  | Coversyl Plus TABS                                                   |
|       | 02050501        |  | Coversyl TABS 4MG                                                    |
|       | 02050502        |  | Cozaar Tablets 100 mg                                                |
|       | 0205052N0BBABAB |  | Cozaar Tablets 50 mg                                                 |
| bk38. | 02050502        |  | Cozaar 100mg tablets (Merck Sharp & Dohme Ltd)                       |
|       | 02.05.05.02.00  |  | Cozaar 100mg tablets (Merck Sharp & Dohme Ltd)                       |
|       | 02.05.05.02.00  |  | Cozaar 12.5mg tablets (Merck Sharp & Dohme Ltd)                      |
|       | 02.05.05.02.00  |  | Cozaar 25mg tablets (Merck Sharp & Dohme Ltd)                        |
|       | 0205052N0BBABAB |  | cozaar 50mg tablet                                                   |
|       | 02.05.05.02.00  |  | Cozaar 50mg tablets (Merck Sharp & Dohme Ltd)                        |
|       | 02050502        |  | Cozaar Comp 100mg/12.5mg TABS                                        |
|       | 02050502        |  | Cozaar Comp 100mg/25mg TABS                                          |
|       | 0205052P0BBAAAA |  | COZAAR COMP 50MG/12.5MG TABLETS                                      |
|       | 0205052P0BBAAAA |  | Cozaar Comp 50mg/12.5mg TABS                                         |
|       | 02050502        |  | COZAAR TABLETS 100MG                                                 |
|       | 02050502        |  | Cozaar TABS 100MG                                                    |
|       | 0205052N0BBABAB |  | Cozaar TABS 50MG                                                     |
|       | 0205052P0BBAAAA |  | Cozaar-Comp Tablets                                                  |
|       | 02050502        |  | Cozaar-Comp Tablets 100 mg + 25 mg                                   |
|       | 0205052P0BBAAAA |  | Cozaar-Comp Tablets 50 mg + 12.5 mg                                  |
|       | 02.05.05.02.00  |  | Cozaar-Comp 100mg/12.5mg tablets (Merck Sharp & Dohme Ltd)           |
|       | 02.02.01.00.00  |  | Cozaar-Comp 100mg/25mg tablets (Merck Sharp & Dohme Ltd)             |
| bk36. | 02050504        |  | Cozaar-Comp 50mg/12.5mg tablets (Merck Sharp & Dohme Ltd)            |
|       | 02.02.01.00.00  |  | Cozaar-Comp 50mg/12.5mg tablets (Merck Sharp & Dohme Ltd)            |
|       | 02.05.05.01.00  |  | Co-zidocapt 12.5mg/25mg tablets                                      |
|       | 02.02.01.00.00  |  | Co-zidocapt 25mg/50mg tablets                                        |
|       | 0205052V0BBACAC |  | Diovan Capsules 160 mg                                               |
|       | 0205052V0BBAAAA |  | Diovan Capsules 40 mg                                                |

|       |                 |  |                                                           |
|-------|-----------------|--|-----------------------------------------------------------|
|       | 0205052V0BBABAB |  | Diovan Capsules 80 mg                                     |
|       | 02.05.05.02.00  |  | Diovan 160mg capsules (Novartis Pharmaceuticals UK Ltd)   |
| bk44. | 02050502        |  | Diovan 40mg capsules (Novartis Pharmaceuticals UK Ltd)    |
|       | 02.05.05.02.00  |  | Diovan 40mg capsules (Novartis Pharmaceuticals UK Ltd)    |
|       | 02.05.05.02.00  |  | Diovan 40mg tablets (Novartis Pharmaceuticals UK Ltd)     |
| bk45. | 02050502        |  | Diovan 80mg capsules (Novartis Pharmaceuticals UK Ltd)    |
|       | 02.05.05.02.00  |  | Diovan 80mg capsules (Novartis Pharmaceuticals UK Ltd)    |
|       | 0205052V0BBAAAA |  | Diovan CAPS 40MG                                          |
|       | 0202080K0BCAAAB |  | DIUMIDE K-P42 TABLET                                      |
|       | 02.02.08.00.00  |  | Diumide-K Continus tablets (Teofarma)                     |
|       | 02.02.01.00.00  |  | Diurexan 20mg tablets (Meda Pharmaceuticals Ltd)          |
|       | 0202010Y0BBAAAA |  | DIUREXAN TABLETS 20MG                                     |
|       | 0202010Y0BBAAAA |  | Diurexan TABS 20MG                                        |
| bi2x. | 02050501        |  | Enalapril 10mg tablets                                    |
|       | 02.05.05.01.00  |  | Enalapril 10mg tablets                                    |
|       | 02.05.05.01.00  |  | Enalapril 10mg tablets (A A H Pharmaceuticals Ltd)        |
|       | 02.05.05.01.00  |  | Enalapril 10mg tablets (Almus Pharmaceuticals Ltd)        |
|       | 02.05.05.01.00  |  | Enalapril 10mg tablets (Teva UK Ltd)                      |
| bi2t. | 02050501        |  | Enalapril 2.5mg tablets                                   |
|       | 02.05.05.01.00  |  | Enalapril 2.5mg tablets                                   |
|       | 02.05.05.01.00  |  | Enalapril 2.5mg tablets (Dexcel-Pharma Ltd)               |
| bi2b. | 02050501        |  | Enalapril 20mg / Hydrochlorothiazide 12.5mg tablets       |
|       | 02.05.05.01.00  |  | Enalapril 20mg / Hydrochlorothiazide 12.5mg tablets       |
| bi2y. | 02050501        |  | Enalapril 20mg tablets                                    |
| bi2z. | 02050501        |  | Enalapril 20mg tablets                                    |
|       | 02.05.05.01.00  |  | Enalapril 20mg tablets                                    |
|       | 02.05.05.01.00  |  | Enalapril 20mg tablets (Almus Pharmaceuticals Ltd)        |
|       | 02.05.05.01.00  |  | Enalapril 20mg tablets (Teva UK Ltd)                      |
| bi2u. | 02050501        |  | Enalapril 5mg tablets                                     |
| bi2v. | 02050501        |  | Enalapril 5mg tablets                                     |
|       | 02.05.05.01.00  |  | Enalapril 5mg tablets                                     |
|       | 02.05.05.01.00  |  | Enalapril 5mg tablets (Kent Pharmaceuticals Ltd)          |
|       | 02.05.05.01.00  |  | Enalapril 5mg tablets (Teva UK Ltd)                       |
|       | 02050501        |  | Enalapril And Hydrochlorothiazide Tablets 20 mg + 12.5 mg |
|       | 0205051I0AAACAC |  | Enalapril Maleate Tablets 10 mg                           |
|       | 0205051I0AAAAAA |  | Enalapril Maleate Tablets 2.5 mg                          |
|       | 0205051I0AAADAD |  | Enalapril Maleate Tablets 20 mg                           |
|       | 0205051I0AAABAB |  | Enalapril Maleate Tablets 5 mg                            |
|       | 0205051I0AAABAB |  | ENALAPRIL MALEATE 5MG TABLETS                             |
|       | 0205051I0AAADAD |  | ENALAPRIL MALEATE NON TARIFF TABLETS 20MG                 |
|       | 0205051I0AAADAD |  | Enalapril Maleate Non Tariff TABS 20MG                    |

|       |                 |  |                                                              |
|-------|-----------------|--|--------------------------------------------------------------|
|       | 0205051I0AAACAC |  | Enalapril Maleate TABLETS 10MG                               |
|       | 0205051I0AAACAC |  | ENALAPRIL MALEATE TABLETS 10MG                               |
|       | 0205051I0AAACAC |  | ENALAPRIL MALEATE TABLETS 10MG-P42 0                         |
|       | 0205051I0AAAAAA |  | Enalapril Maleate TABLETS 2.5MG                              |
|       | 0205051I0AAAAAA |  | ENALAPRIL MALEATE TABLETS 2.5MG                              |
|       | 0205051I0AADAD  |  | ENALAPRIL MALEATE TABLETS 20MG                               |
|       | 0205051I0AABAB  |  | Enalapril Maleate TABLETS 5MG                                |
|       | 0205051I0AABAB  |  | ENALAPRIL MALEATE TABLETS 5MG                                |
|       | 0205051I0AABAB  |  | ENALAPRIL MALEATE TABLETS 5MG-P42 0                          |
|       | 0205051I0AAACAC |  | Enalapril Maleate TABS 10MG                                  |
|       | 0205051I0AAAAAA |  | Enalapril Maleate TABS 2.5MG                                 |
|       | 0205051I0AADAD  |  | Enalapril Maleate TABS 20MG                                  |
|       | 0205051I0AABAB  |  | Enalapril Maleate TABS 5MG                                   |
|       | 0205051I0AABAB  |  | ENALAPRIL MALEATE tabs 5mg-P42 0                             |
|       | 0205051I0AAACAC |  | Enalapril maleate-P42 10mg tab                               |
|       | 0205051I0AADAD  |  | ENALAPRIL MALEATE-P42 20mg tab                               |
|       | 0205051I0AABAB  |  | ENALAPRIL MALEATE-P42 5MG TAB                                |
|       | 0205051I0AAACAC |  | ENALAPRIL TABLETS 10MG                                       |
|       | 0205051I0AAACAC |  | ENALAPRIL TABLETS 10MG-P42 0                                 |
|       | 0205051I0AABAB  |  | ENALAPRIL TABLETS 5MG                                        |
|       | 0205051I0AABAB  |  | ENALAPRIL TABLETS 5MG-P42 0                                  |
|       | 0205051I0AAACAC |  | ENALAPRIL tablets TAB 10mg-P42 0                             |
|       | 0205051I0AABAB  |  | ENALAPRIL tablets TAB 5mg-P42 0                              |
| bi2z. | 02050501        |  | ENALAPRIL tabs 20mg                                          |
| bi2v. | 02050501        |  | ENALAPRIL tabs 5mg                                           |
|       | 02.05.05.01.00  |  | enalapril wafer 20mg                                         |
| bk11. | 02050502        |  | Entresto 24mg/26mg tablets (Novartis Pharmaceuticals UK Ltd) |
|       | 020203          |  | Eplerenone Tablets 25 mg                                     |
|       | 020203          |  | Eplerenone Tablets 50 mg                                     |
| b45z. | 02020300        |  | Eplerenone 25mg tablets                                      |
|       | 02.02.03.00.00  |  | Eplerenone 25mg tablets                                      |
|       | 02.02.03.00.00  |  | Eplerenone 25mg tablets (Actavis UK Ltd)                     |
|       | 02.02.03.00.00  |  | Eplerenone 25mg tablets (Teva UK Ltd)                        |
| b45y. | 02020300        |  | Eplerenone 50mg tablets                                      |
|       | 02.02.03.00.00  |  | Eplerenone 50mg tablets                                      |
|       | 020203          |  | EPLERENONE TABLETS 25MG                                      |
| b45z. | 02020300        |  | EPLERENONE tabs 25mg                                         |
|       | 020203          |  | Eplerenone TABS 25MG                                         |
|       | 020203          |  | Eplerenone TABS 50MG                                         |
|       | 02050502        |  | Eprosartan Tablets 300 mg                                    |
|       | 02050502        |  | Eprosartan Tablets 400 mg                                    |

|       |                 |  |                                                              |
|-------|-----------------|--|--------------------------------------------------------------|
|       | 02050502        |  | Eprosartan Tablets 600 mg                                    |
| bk9x. | 02050502        |  | Eprosartan 300mg tablets                                     |
|       | 02.05.05.02.00  |  | Eprosartan 300mg tablets                                     |
| bk9y. | 02050502        |  | Eprosartan 400mg tablets                                     |
|       | 02.05.05.02.00  |  | Eprosartan 400mg tablets                                     |
|       | 02.05.05.02.00  |  | Eprosartan 600mg tablets                                     |
|       | 02050502        |  | EPROSARTAN MESILATE TABLETS 300MG                            |
|       | 02050502        |  | EPROSARTAN MESILATE TABLETS 400MG                            |
|       | 02050502        |  | EPROSARTAN MESILATE TABLETS 600MG                            |
|       | 02050502        |  | Eprosartan Mesilate TABS 600MG                               |
|       | 02.05.05.02.00  |  | Exforge 10mg/160mg tablets (Novartis Pharmaceuticals UK Ltd) |
|       | 02.05.05.02.00  |  | Exforge 5mg/160mg tablets (Novartis Pharmaceuticals UK Ltd)  |
|       | 02.05.05.02.00  |  | Exforge 5mg/80mg tablets (Novartis Pharmaceuticals UK Ltd)   |
|       | 02.05.05.01.00  |  | Fosinopril 10mg tablets                                      |
|       | 02.05.05.01.00  |  | Fosinopril 10mg tablets (Actavis UK Ltd)                     |
| bi72. | 02050501        |  | Fosinopril 20mg tablets                                      |
|       | 02.05.05.01.00  |  | Fosinopril 20mg tablets                                      |
|       | 02.05.05.01.00  |  | Fosinopril 20mg tablets (A A H Pharmaceuticals Ltd)          |
|       | 0205051J0AAAAAA |  | Fosinopril Sodium Tablets 10 mg                              |
|       | 0205051J0AAABAB |  | Fosinopril Sodium Tablets 20 mg                              |
|       | 0205051J0AAAAAA |  | FOSINOPRIL SODIUM TABLETS 10MG                               |
|       | 0205051J0AAABAB |  | FOSINOPRIL SODIUM TABLETS 20MG                               |
|       | 0205051J0AAAAAA |  | Fosinopril Sodium TABS 10MG                                  |
|       | 0205051J0AAABAB |  | Fosinopril Sodium TABS 20MG                                  |
|       | 0205051J0AAABAB |  | FOSINOPRIL TABLETS 20MG                                      |
|       | 0202040B0BBAAAA |  | Frumil Tablets                                               |
|       | 02.02.03.00.00  |  | Frumil 40mg/5mg tablets (Sanofi)                             |
|       | 0202040B0BBACAC |  | Frumil Forte Tablets                                         |
|       | 02.02.04.00.00  |  | Frumil Forte 10mg/80mg tablets (Sanofi)                      |
|       | 0202040B0BBACAC |  | Frumil Forte TABS                                            |
|       | 02.02.02.00.00  |  | Frumil LS 20mg/2.5mg tablets (Sanofi)                        |
|       | 0202040B0BBABAB |  | FRUMIL LS TABLETS                                            |
|       | 02.02.02.00.00  |  | FRUMIL LS tablets 20mg + 2.5mg [HELIOS]                      |
|       | 0202040B0BBABAB |  | Frumil Ls TABS                                               |
|       | 0202040B0BBAAAA |  | FRUMIL TABLETS                                               |
|       | 02.02.04.00.00  |  | FRUMIL tablets 40mg + 5mg [HELIOS]                           |
|       | 0202040B0BBAAAA |  | Frumil TABS                                                  |
|       | 0202040B0BBAAAA |  | FRUMIL TABS                                                  |
|       | 0202040B0BBAAAA |  | Frumil-P42 tablet                                            |

|       |                 |  |                                                                          |
|-------|-----------------|--|--------------------------------------------------------------------------|
|       | 0202020LOAABBBB |  | Frusamide Tablets 20 mg                                                  |
|       | 0202020LOAABDBD |  | Frusamide Tablets 40 mg                                                  |
|       | 020202          |  | Frusamide-P42 20mg tablet                                                |
|       | 020202          |  | FRUSEMIDE-P42 20mg tablet                                                |
|       | 020202          |  | FRUSEMIDE-P42 40mg tabs                                                  |
|       | 0202040U0BBAAAA |  | Frusene Tablets                                                          |
| b517. | 02020400        |  | Frusene 50mg/40mg tablets (Orion Pharma (UK) Ltd)                        |
|       | 02.02.04.00.00  |  | Frusene 50mg/40mg tablets (Orion Pharma (UK) Ltd)                        |
|       | 0202040U0BBAAAA |  | FRUSENE TABLETS                                                          |
|       | 0202040U0BBAAAA |  | FRUSENE-P42 TABLET                                                       |
|       | 020202          |  | Frusol Solution 40 mg/5 ml                                               |
|       | 02.02.02.00.00  |  | Frusol 40mg/5ml oral solution (Rosemont Pharmaceuticals Ltd)             |
|       | 020202          |  | Furosemide Tablets 20 mg                                                 |
|       | 020202          |  | Furosemide Tablets 40 mg                                                 |
|       | 020202          |  | Furosemide Tablets 500 mg                                                |
| b311. | 02020200        |  | Furosemide 20mg tablets                                                  |
|       | 02.02.02.00.00  |  | Furosemide 20mg tablets                                                  |
|       | 02.02.02.00.00  |  | Furosemide 20mg tablets (A A H Pharmaceuticals Ltd)                      |
|       | 02.02.02.00.00  |  | Furosemide 20mg tablets (Actavis UK Ltd)                                 |
|       | 02.02.02.00.00  |  | Furosemide 20mg tablets (Almus Pharmaceuticals Ltd)                      |
|       | 02.02.02.00.00  |  | Furosemide 20mg tablets (Ranbaxy (UK) Ltd)                               |
|       | 02.02.02.00.00  |  | Furosemide 20mg tablets (Teva UK Ltd)                                    |
|       | 02.02.02.00.00  |  | Furosemide 20mg/2ml solution for injection ampoules                      |
| b31r. | 02020200        |  | Furosemide 20mg/5ml oral solution sugar free                             |
|       | 02.02.02.00.00  |  | Furosemide 20mg/5ml oral solution sugar free                             |
|       | 02.02.02.00.00  |  | Furosemide 20mg/5ml oral solution sugar free (Focus Pharmaceuticals Ltd) |
| b312. | 02020200        |  | Furosemide 40mg tablets                                                  |
|       | 02.02.02.00.00  |  | Furosemide 40mg tablets                                                  |
|       | 02.02.02.00.00  |  | Furosemide 40mg tablets (A A H Pharmaceuticals Ltd)                      |
|       | 02.02.02.00.00  |  | Furosemide 40mg tablets (Actavis UK Ltd)                                 |
|       | 02.02.02.00.00  |  | Furosemide 40mg tablets (Almus Pharmaceuticals Ltd)                      |
|       | 02.02.02.00.00  |  | Furosemide 40mg tablets (Ranbaxy (UK) Ltd)                               |
|       | 02.02.02.00.00  |  | Furosemide 40mg tablets (Sandoz Ltd)                                     |
|       | 02.02.02.00.00  |  | Furosemide 40mg tablets (Teva UK Ltd)                                    |
| b31s. | 02020200        |  | Furosemide 40mg/5ml oral solution sugar free                             |
|       | 02.02.02.00.00  |  | Furosemide 40mg/5ml oral solution sugar free                             |
|       | 02.02.02.00.00  |  | Furosemide 500mg tablets                                                 |
|       | 02.02.02.00.00  |  | Furosemide 500mg tablets (Actavis UK Ltd)                                |
|       | 02.02.02.00.00  |  | Furosemide 50mg/5ml oral solution sugar free                             |
| b31u. | 02020200        |  | Furosemide 50mg/5ml solution for injection ampoules                      |

|       |                 |  |                                                                       |
|-------|-----------------|--|-----------------------------------------------------------------------|
|       | 02.02.02.00.00  |  | Furosemide 50mg/5ml solution for injection ampoules                   |
|       | 02.02.02.00.00  |  | Furosemide 80mg/8ml solution for injection pre-filled syringes        |
|       | 020202          |  | Furosemide Sf Oral SOLN 40MG/5ML                                      |
|       | 020202          |  | Furosemide TABLETS 20MG                                               |
|       | 020202          |  | FUROSEMIDE TABLETS 20MG                                               |
|       | 020202          |  | Furosemide TABLETS 40MG                                               |
|       | 020202          |  | FUROSEMIDE TABLETS 40MG                                               |
|       | 02.02.02.00.00  |  | FUROSEMIDE tablets 40mg [CP PHARM]                                    |
| b311. | 02020200        |  | FUROSEMIDE tabs 20mg                                                  |
|       | 020202          |  | Furosemide TABS 20MG                                                  |
| b312. | 02020200        |  | FUROSEMIDE tabs 40mg                                                  |
|       | 020202          |  | Furosemide TABS 40MG                                                  |
|       | 020202          |  | Furosemide TABS 500MG                                                 |
|       | 02.02.04.00.00  |  | furosemide with amiloride tablets 20mg + 2.5mg                        |
| bi95. | 02050501        |  | Gopten 1mg capsules (Abbott Laboratories Ltd)                         |
|       | 02.05.05.01.00  |  | Gopten 1mg capsules (Abbott Laboratories Ltd)                         |
|       | 02.05.05.01.00  |  | Gopten 2mg capsules (Abbott Laboratories Ltd)                         |
|       | 02.05.05.01.00  |  | Gopten 4mg capsules (Abbott Laboratories Ltd)                         |
|       | 02.05.05.01.00  |  | Gopten 500microgram capsules (Abbott Laboratories Ltd)                |
|       | 0205051U0BBAAAA |  | Gopten CAPS 500MICROGRAMS                                             |
|       | 02.02.01.00.00  |  | Hygroton 50mg tablets (Alliance Pharmaceuticals Ltd)                  |
|       | 02.02.01.00.00  |  | HYGROTON -K tablets [NOV/GEIGY]                                       |
|       | 0202010F0BBAAAA |  | HYGROTON TABLETS 50MG                                                 |
|       | 0202010F0BBAAAA |  | Hygroton TABS 50MG                                                    |
|       | 02.05.05.01.00  |  | HYTENEZE tablets 25mg [OPUS]                                          |
|       | 02.05.05.01.00  |  | HYTENEZE tablets 50mg [OPUS]                                          |
| biBz. | 02050501        |  | Imidapril 10mg tablets                                                |
|       | 02.05.05.01.00  |  | Imidapril 10mg tablets                                                |
|       | 02.05.05.01.00  |  | Imidapril 20mg tablets                                                |
|       | 02.05.05.01.00  |  | Imidapril 5mg tablets                                                 |
|       | 02050501        |  | IMIDAPRIL HYDROCHLORIDE TABLETS 10MG                                  |
|       | 02050501        |  | IMIDAPRIL HYDROCHLORIDE TABLETS 5MG                                   |
|       | 02050501        |  | Imidapril Hydrochloride TABS 10MG                                     |
|       | 0202010P0AADAD  |  | Indapamide M/R tablets 1.5 mg                                         |
|       | 0202010P0AAAAAA |  | Indapamide Tablets 2.5 mg                                             |
| b285. | 02020100        |  | Indapamide 1.5mg modified-release tablets                             |
|       | 02.02.01.00.00  |  | Indapamide 1.5mg modified-release tablets                             |
|       | 0202010P0AADAD  |  | Indapamide 1.5mg modified-release tablets                             |
|       | 02.02.01.00.00  |  | Indapamide 1.5mg modified-release tablets (A A H Pharmaceuticals Ltd) |
|       | 02.02.01.00.00  |  | Indapamide 1.5mg modified-release tablets (Sandoz Ltd)                |



|       |                 |  |                                                        |
|-------|-----------------|--|--------------------------------------------------------|
| b28z. | 02020100        |  | Indapamide 2.5mg tablets                               |
|       | 02.02.01.00.00  |  | Indapamide 2.5mg tablets                               |
|       | 02.02.01.00.00  |  | Indapamide 2.5mg tablets (A A H Pharmaceuticals Ltd)   |
|       | 02.02.01.00.00  |  | Indapamide 2.5mg tablets (Actavis UK Ltd)              |
|       | 02.02.01.00.00  |  | Indapamide 2.5mg tablets (Arrow Generics Ltd)          |
|       | 02.02.01.00.00  |  | Indapamide 2.5mg tablets (Mylan Ltd)                   |
|       | 02.02.01.00.00  |  | Indapamide 2.5mg tablets (Niche Generics Ltd)          |
|       | 02.02.01.00.00  |  | Indapamide 2.5mg tablets (Teva UK Ltd)                 |
|       | 02.02.01.00.00  |  | Indapamide 2.5mg tablets (Zentiva)                     |
|       | 0202010P0AAADAD |  | Indapamide Mr TABLETS 1.5MG                            |
|       | 0202010P0AAADAD |  | INDAPAMIDE MR TABLETS 1.5MG                            |
|       | 0202010P0AAADAD |  | Indapamide Mr TABS 1.5MG                               |
|       | 0202010P0AAAAAA |  | INDAPAMIDE TABLETS 2.5MG                               |
|       | 0202010P0AAAAAA |  | Indapamide TABS 2.5MG                                  |
|       | 0205051I0BBACAC |  | Innovace Tablets 10 mg                                 |
|       | 0205051I0BBADAD |  | Innovace Tablets 20 mg                                 |
|       | 0205051I0BBABAB |  | Innovace Tablets 5 mg                                  |
| bi24. | 02050501        |  | Innovace 10mg tablets (Merck Sharp & Dohme Ltd)        |
|       | 02.05.05.01.00  |  | Innovace 10mg tablets (Merck Sharp & Dohme Ltd)        |
|       | 02.05.05.01.00  |  | Innovace 2.5mg tablets (Merck Sharp & Dohme Ltd)       |
|       | 02.05.05.01.00  |  | Innovace 20mg tablets (Merck Sharp & Dohme Ltd)        |
|       | 02.05.05.01.00  |  | Innovace 5mg tablets (Merck Sharp & Dohme Ltd)         |
|       | 02.05.05.01.00  |  | INNOVACE MELT wafer 10mg [M S D]                       |
|       | 02.05.05.01.00  |  | INNOVACE MELT wafer 5mg [M S D]                        |
|       | 0205051I0BBACAC |  | INNOVACE TABLETS 10MG                                  |
|       | 0205051I0BBABAB |  | INNOVACE TABLETS 5MG                                   |
|       | 0205051I0BBACAC |  | Innovace TABS 10MG                                     |
|       | 0205051I0BBADAD |  | Innovace TABS 20MG                                     |
| bi28. | 02050501        |  | Innozide 20mg/12.5mg tablets (Merck Sharp & Dohme Ltd) |
|       | 02.05.05.01.00  |  | Innozide 20mg/12.5mg tablets (Merck Sharp & Dohme Ltd) |
|       | 0205051H0BBAAAA |  | Innozide TABS                                          |
|       | 02.02.03.00.00  |  | Inspra 25mg tablets (Pfizer Ltd)                       |
|       | 0205052I0AAABAB |  | Irbesartan Tablets 150 mg                              |
|       | 0205052I0AAACAC |  | Irbesartan Tablets 300 mg                              |
|       | 0205052I0AAAAAA |  | Irbesartan Tablets 75 mg                               |
|       | 02.02.01.00.00  |  | Irbesartan 150mg / Hydrochlorothiazide 12.5mg tablets  |
| bk52. | 02050502        |  | Irbesartan 150mg tablets                               |
|       | 02.05.05.02.00  |  | Irbesartan 150mg tablets                               |
|       | 0205052I0AAABAB |  | IRBESARTAN 150MG TABLETS                               |
|       | 02.05.05.02.00  |  | Irbesartan 150mg tablets (Actavis UK Ltd)              |

|       |                 |  |                                                                        |
|-------|-----------------|--|------------------------------------------------------------------------|
|       | 02.05.05.02.00  |  | Irbesartan 150mg tablets (Dexcel-Pharma Ltd)                           |
|       | 02.05.05.02.00  |  | Irbesartan 150mg tablets (Teva UK Ltd)                                 |
| bk5y. | 02050504        |  | Irbesartan 300mg / Hydrochlorothiazide 12.5mg tablets                  |
|       | 02.02.01.00.00  |  | Irbesartan 300mg / Hydrochlorothiazide 12.5mg tablets                  |
|       | 02.05.05.02.00  |  | Irbesartan 300mg / Hydrochlorothiazide 12.5mg tablets (Actavis UK Ltd) |
| bk5x. | 02050504        |  | Irbesartan 300mg / Hydrochlorothiazide 25mg tablets                    |
|       | 02.05.05.02.00  |  | Irbesartan 300mg / Hydrochlorothiazide 25mg tablets                    |
| bk53. | 02050502        |  | Irbesartan 300mg tablets                                               |
|       | 02.05.05.02.00  |  | Irbesartan 300mg tablets                                               |
|       | 0205052I0AAACAC |  | IRBESARTAN 300MG TABLETS                                               |
|       | 02.05.05.02.00  |  | Irbesartan 300mg tablets (Actavis UK Ltd)                              |
|       | 02.05.05.02.00  |  | Irbesartan 300mg tablets (Teva UK Ltd)                                 |
|       | 02.05.05.02.00  |  | Irbesartan 300mg/5ml oral suspension                                   |
|       | 0205052I0AAAAAA |  | IRBESARTAN 75MG                                                        |
| bk51. | 02050502        |  | Irbesartan 75mg tablets                                                |
|       | 02.05.05.02.00  |  | Irbesartan 75mg tablets                                                |
|       | 02.05.05.02.00  |  | Irbesartan 75mg tablets (Actavis UK Ltd)                               |
|       | 02.05.05.02.00  |  | Irbesartan 75mg tablets (Teva UK Ltd)                                  |
|       | 0205052I0AAABAB |  | IRBESARTAN TABLETS 150MG                                               |
|       | 0205052I0AAACAC |  | IRBESARTAN TABLETS 300MG                                               |
|       | 0205052I0AAAAAA |  | IRBESARTAN TABLETS 75MG                                                |
|       | 0205052I0AAABAB |  | Irbesartan TABS 150MG                                                  |
|       | 0205052I0AAACAC |  | Irbesartan TABS 300MG                                                  |
|       | 0205052I0AAAAAA |  | Irbesartan TABS 75MG                                                   |
|       | 0202040V0BBAAAA |  | KALSPARE TABLETS                                                       |
|       | 02.02.01.00.00  |  | KALSPARE tablets [DOMINION]                                            |
|       | 02.02.08.00.00  |  | Lasikal modified-release tablets (Borg Medicare)                       |
| b519. | 02020400        |  | Lasilactone 20mg/50mg capsules (Sanofi)                                |
|       | 02.02.04.00.00  |  | Lasilactone 20mg/50mg capsules (Sanofi)                                |
|       | 02.02.02.00.00  |  | Lasix 20mg tablets (Borg Medicare)                                     |
|       | 02.02.02.00.00  |  | Lasix 40mg tablets (Sanofi)                                            |
|       | 02.02.02.00.00  |  | Lasoride 5mg/40mg tablets (Sanofi)                                     |
|       | 0205051L0AAACAC |  | Lisinopril Tablets 10 mg                                               |
|       | 0205051L0AAAAAA |  | Lisinopril Tablets 2.5 mg                                              |
|       | 0205051L0AADAD  |  | Lisinopril Tablets 20 mg                                               |
|       | 0205051L0AAABAB |  | Lisinopril Tablets 5 mg                                                |
| bi3t. | 02050501        |  | LISINOPRIL + HYDROCHLOROTHIAZIDE tabs 10mg + 12.5mg                    |
| bi3p. | 02050501        |  | LISINOPRIL + HYDROCHLOROTHIAZIDE tabs 20mg + 12.5mg                    |
|       | 0205051L0AAACAC |  | LISINOPRIL 10 MG TAB                                                   |

|       |                 |  |                                                                                  |
|-------|-----------------|--|----------------------------------------------------------------------------------|
| bi3t. | 02050501        |  | Lisinopril 10mg / Hydrochlorothiazide 12.5mg tablets                             |
|       | 02.02.01.00.00  |  | Lisinopril 10mg / Hydrochlorothiazide 12.5mg tablets                             |
|       | 02.05.05.01.00  |  | Lisinopril 10mg / Hydrochlorothiazide 12.5mg tablets (Teva UK Ltd)               |
|       | 0205051L0AAACAC |  | LISINOPRIL 10MG TABLET                                                           |
| bi33. | 02050501        |  | Lisinopril 10mg tablets                                                          |
|       | 02.05.05.01.00  |  | Lisinopril 10mg tablets                                                          |
|       | 02.05.05.01.00  |  | Lisinopril 10mg tablets (Actavis UK Ltd)                                         |
|       | 02.05.05.01.00  |  | Lisinopril 10mg tablets (Almus Pharmaceuticals Ltd)                              |
|       | 02.05.05.01.00  |  | Lisinopril 10mg tablets (Mylan Ltd)                                              |
|       | 02.05.05.01.00  |  | Lisinopril 10mg tablets (Ranbaxy (UK) Ltd)                                       |
|       | 02.05.05.01.00  |  | Lisinopril 10mg tablets (Teva UK Ltd)                                            |
|       | 02.05.05.01.00  |  | Lisinopril 10mg tablets (Tillomed Laboratories Ltd)                              |
| bi31. | 02050501        |  | Lisinopril 2.5mg tablets                                                         |
|       | 02.05.05.01.00  |  | Lisinopril 2.5mg tablets                                                         |
|       | 02.05.05.01.00  |  | Lisinopril 2.5mg tablets (Actavis UK Ltd)                                        |
|       | 02.05.05.01.00  |  | Lisinopril 2.5mg tablets (Almus Pharmaceuticals Ltd)                             |
|       | 02.05.05.01.00  |  | Lisinopril 2.5mg tablets (Arrow Generics Ltd)                                    |
|       | 02.05.05.01.00  |  | Lisinopril 2.5mg tablets (Teva UK Ltd)                                           |
|       | 02.05.05.01.00  |  | Lisinopril 2.5mg/5ml oral solution                                               |
| bi3p. | 02050501        |  | Lisinopril 20mg / Hydrochlorothiazide 12.5mg tablets                             |
|       | 02.02.01.00.00  |  | Lisinopril 20mg / Hydrochlorothiazide 12.5mg tablets                             |
|       | 02.02.01.00.00  |  | Lisinopril 20mg / Hydrochlorothiazide 12.5mg tablets (A A H Pharmaceuticals Ltd) |
|       | 02.05.05.01.00  |  | Lisinopril 20mg / Hydrochlorothiazide 12.5mg tablets (Mylan Ltd)                 |
|       | 02.02.01.00.00  |  | Lisinopril 20mg / Hydrochlorothiazide 12.5mg tablets (Teva UK Ltd)               |
| bi34. | 02050501        |  | Lisinopril 20mg tablets                                                          |
|       | 02.05.05.01.00  |  | Lisinopril 20mg tablets                                                          |
|       | 0205051L0AAADAD |  | LISINOPRIL 20MG TABLETS                                                          |
|       | 02.05.05.01.00  |  | Lisinopril 20mg tablets (Actavis UK Ltd)                                         |
|       | 02.05.05.01.00  |  | Lisinopril 20mg tablets (Almus Pharmaceuticals Ltd)                              |
|       | 02.05.05.01.00  |  | Lisinopril 20mg tablets (Mylan Ltd)                                              |
|       | 02.05.05.01.00  |  | Lisinopril 20mg tablets (Ranbaxy (UK) Ltd)                                       |
|       | 02.05.05.01.00  |  | Lisinopril 20mg tablets (Teva UK Ltd)                                            |
|       | 0205051L0AAABAB |  | LISINOPRIL 5 MGM TAB                                                             |
|       | 0205051L0AAABAB |  | LISINOPRIL 5MG                                                                   |
|       | 0205051L0AAABAB |  | LISINOPRIL 5MG -                                                                 |
| bi32. | 02050501        |  | Lisinopril 5mg tablets                                                           |
|       | 02.05.05.01.00  |  | Lisinopril 5mg tablets                                                           |
|       | 0205051L0AAABAB |  | LISINOPRIL 5MG TABLETS                                                           |
|       | 02.05.05.01.00  |  | Lisinopril 5mg tablets (A A H Pharmaceuticals Ltd)                               |

|       |                 |  |                                                            |
|-------|-----------------|--|------------------------------------------------------------|
|       | 02.05.05.01.00  |  | Lisinopril 5mg tablets (Actavis UK Ltd)                    |
|       | 02.05.05.01.00  |  | Lisinopril 5mg tablets (Almus Pharmaceuticals Ltd)         |
|       | 02.05.05.01.00  |  | Lisinopril 5mg tablets (Mylan Ltd)                         |
|       | 02.05.05.01.00  |  | Lisinopril 5mg tablets (Sandoz Ltd)                        |
|       | 02.05.05.01.00  |  | Lisinopril 5mg tablets (Teva UK Ltd)                       |
|       | 02.05.05.01.00  |  | Lisinopril 5mg tablets (Zentiva)                           |
|       | 02.05.05.01.00  |  | Lisinopril 5mg/5ml oral solution                           |
|       | 02.05.05.01.00  |  | Lisinopril 5mg/5ml oral suspension                         |
|       | 02050501        |  | Lisinopril And Hydrochlorothiazide Tablets 10 mg + 12.5 mg |
|       | 02050501        |  | Lisinopril And Hydrochlorothiazide Tablets 20 mg + 12.5 mg |
|       | 02050501        |  | Lisinopril And Hydrochlorothiazide 10mg/12.5mg TABS        |
|       | 02050501        |  | LISINOPRIL AND HYDROCHLOROTHIAZIDE 20MG/12.5MG TABLETS     |
|       | 02050501        |  | Lisinopril And Hydrochlorothiazide 20mg/12.5mg TABS        |
|       | 0205051L0AAACAC |  | Lisinopril Non Tariff TABS 10MG                            |
|       | 0205051L0AAAAAA |  | LISINOPRIL STARTER PACK TABLETS 2.5MG                      |
|       | 0205051L0AAACAC |  | LISINOPRIL TABLETS 10MG                                    |
|       | 0205051L0AAACAC |  | LISINOPRIL TABLETS 10MG-P42 0                              |
|       | 0205051L0AAAAAA |  | LISINOPRIL TABLETS 2.5MG                                   |
|       | 02.05.05.01.00  |  | LISINOPRIL tablets 2.5mg [ZENTIVA]                         |
|       | 0205051L0AAAAAA |  | LISINOPRIL TABLETS 2.5MG-P42 0                             |
|       | 0205051L0AADAD  |  | LISINOPRIL TABLETS 20MG                                    |
|       | 02.05.05.01.00  |  | LISINOPRIL tablets 20mg [NICHE]                            |
|       | 02.05.05.01.00  |  | LISINOPRIL tablets 20mg [ZENTIVA]                          |
|       | 0205051L0AABAB  |  | LISINOPRIL TABLETS 5MG                                     |
|       | 0205051L0AABAB  |  | LISINOPRIL TABLETS 5MG-P42 0                               |
| bi33. | 02050501        |  | LISINOPRIL tabs 10mg                                       |
|       | 0205051L0AAACAC |  | Lisinopril TABS 10MG                                       |
| bi31. | 02050501        |  | LISINOPRIL tabs 2.5mg                                      |
|       | 0205051L0AAAAAA |  | Lisinopril TABS 2.5MG                                      |
| bi34. | 02050501        |  | LISINOPRIL tabs 20mg                                       |
|       | 0205051L0AADAD  |  | Lisinopril TABS 20MG                                       |
| bi32. | 02050501        |  | LISINOPRIL tabs 5mg                                        |
|       | 0205051L0AABAB  |  | Lisinopril TABS 5MG                                        |
|       | 02.05.05.01.00  |  | Lopace 10mg capsules (Discovery Pharmaceuticals)           |
|       | 02.05.05.01.00  |  | Lopace 2.5mg capsules (Discovery Pharmaceuticals)          |
|       | 02.05.05.01.00  |  | Lopace 5mg capsules (Discovery Pharmaceuticals)            |
|       | 02.02.01.00.00  |  | LOPRESORETIC tablets [NOV/GEIGY]                           |
| bk3y. | 02050504        |  | Losartan 100mg / Hydrochlorothiazide 12.5mg tablets        |
|       | 02.02.01.00.00  |  | Losartan 100mg / Hydrochlorothiazide 12.5mg tablets        |

|       |                |  |                                                                               |
|-------|----------------|--|-------------------------------------------------------------------------------|
|       | 02.05.05.02.00 |  | Losartan 100mg / Hydrochlorothiazide 12.5mg tablets (Actavis UK Ltd)          |
|       | 02.02.01.00.00 |  | Losartan 100mg / Hydrochlorothiazide 12.5mg tablets (Teva UK Ltd)             |
| bk3z. | 02050504       |  | Losartan 100mg / Hydrochlorothiazide 25mg tablets                             |
|       | 02.05.05.02.00 |  | Losartan 100mg / Hydrochlorothiazide 25mg tablets                             |
|       | 02.02.01.00.00 |  | Losartan 100mg / Hydrochlorothiazide 25mg tablets (A A H Pharmaceuticals Ltd) |
|       | 02.02.01.00.00 |  | Losartan 100mg / Hydrochlorothiazide 25mg tablets (Teva UK Ltd)               |
| bk37. | 02050502       |  | Losartan 100mg tablets                                                        |
|       | 02.05.05.02.00 |  | Losartan 100mg tablets                                                        |
|       | 02.05.05.02.00 |  | Losartan 100mg tablets (A A H Pharmaceuticals Ltd)                            |
|       | 02.05.05.02.00 |  | Losartan 100mg tablets (Actavis UK Ltd)                                       |
|       | 02.05.05.02.00 |  | Losartan 100mg tablets (Dexcel-Pharma Ltd)                                    |
|       | 02.05.05.02.00 |  | Losartan 100mg tablets (Teva UK Ltd)                                          |
|       | 02.05.05.02.00 |  | Losartan 100mg tablets (Wockhardt UK Ltd)                                     |
| bk3C. | 02050502       |  | Losartan 12.5mg tablets                                                       |
|       | 02.05.05.02.00 |  | Losartan 12.5mg tablets                                                       |
|       | 02.05.05.02.00 |  | Losartan 12.5mg tablets (A A H Pharmaceuticals Ltd)                           |
|       | 02.05.05.02.00 |  | Losartan 12.5mg tablets (Dexcel-Pharma Ltd)                                   |
| bk31. | 02050502       |  | Losartan 25mg tablets                                                         |
|       | 02.05.05.02.00 |  | Losartan 25mg tablets                                                         |
|       | 02.05.05.02.00 |  | Losartan 25mg tablets (A A H Pharmaceuticals Ltd)                             |
|       | 02.05.05.02.00 |  | Losartan 25mg tablets (Actavis UK Ltd)                                        |
|       | 02.05.05.02.00 |  | Losartan 25mg tablets (Dexcel-Pharma Ltd)                                     |
|       | 02.05.05.02.00 |  | Losartan 25mg tablets (Teva UK Ltd)                                           |
|       | 02.05.05.02.00 |  | Losartan 25mg tablets (Wockhardt UK Ltd)                                      |
| bk35. | 02050504       |  | Losartan 50mg / Hydrochlorothiazide 12.5mg tablets                            |
|       | 02.02.01.00.00 |  | Losartan 50mg / Hydrochlorothiazide 12.5mg tablets                            |
|       | 02.02.01.00.00 |  | Losartan 50mg / Hydrochlorothiazide 12.5mg tablets (Actavis UK Ltd)           |
|       | 02.02.01.00.00 |  | Losartan 50mg / Hydrochlorothiazide 12.5mg tablets (Teva UK Ltd)              |
| bk32. | 02050502       |  | Losartan 50mg tablets                                                         |
|       | 02.05.05.02.00 |  | Losartan 50mg tablets                                                         |
|       | 02.05.05.02.00 |  | Losartan 50mg tablets (A A H Pharmaceuticals Ltd)                             |
|       | 02.05.05.02.00 |  | Losartan 50mg tablets (Actavis UK Ltd)                                        |
|       | 02.05.05.02.00 |  | Losartan 50mg tablets (Dexcel-Pharma Ltd)                                     |
|       | 02.05.05.02.00 |  | Losartan 50mg tablets (Sovereign Medical Ltd)                                 |
|       | 02.05.05.02.00 |  | Losartan 50mg tablets (Teva UK Ltd)                                           |
|       | 02.05.05.02.00 |  | Losartan 50mg tablets (Wockhardt UK Ltd)                                      |
|       | 02050502       |  | Losartan And Hydrochlorothiazide Tablets 100 mg + 12.5 mg                     |

|       |                 |  |                                                             |
|-------|-----------------|--|-------------------------------------------------------------|
|       | 02050502        |  | Losartan And Hydrochlorothiazide Tablets 100 mg + 25 mg     |
|       | 02050502        |  | Losartan And Hydrochlorothiazide Tablets 50 mg + 12.5 mg    |
|       | 02050502        |  | Losartan Potassium Tablets 100 mg                           |
|       | 02050502        |  | Losartan Potassium Tablets 12.5 mg                          |
|       | 0205052N0AAAAAA |  | Losartan Potassium Tablets 25 mg                            |
|       | 0205052N0AAABAB |  | Losartan Potassium Tablets 50 mg                            |
|       | 02050502        |  | Losartan Potassium TABLETS 100MG                            |
|       | 02050502        |  | LOSARTAN POTASSIUM TABLETS 100MG                            |
|       | 02050502        |  | LOSARTAN POTASSIUM TABLETS 100MG                            |
|       | 0205052N0AAAAAA |  | LOSARTAN POTASSIUM TABLETS 25MG                             |
|       | 0205052N0AAABAB |  | Losartan Potassium TABLETS 50MG                             |
|       | 0205052N0AAABAB |  | LOSARTAN POTASSIUM TABLETS 50MG                             |
|       | 02050502        |  | Losartan Potassium TABS 100MG                               |
|       | 02050502        |  | Losartan Potassium TABS 12.5MG                              |
|       | 0205052N0AAAAAA |  | Losartan Potassium TABS 25MG                                |
|       | 0205052N0AAABAB |  | Losartan Potassium TABS 50MG                                |
|       | 02050502        |  | LOSARTAN TABLETS 100MG                                      |
|       | 0205052N0AAAAAA |  | LOSARTAN TABLETS 25MG                                       |
|       | 0205052N0AAABAB |  | LOSARTAN TABLETS 50MG                                       |
| bk37. | 02050502        |  | LOSARTAN tabs 100mg                                         |
| bk31. | 02050502        |  | LOSARTAN tabs 25mg                                          |
| bk32. | 02050502        |  | LOSARTAN tabs 50mg                                          |
|       | 02.05.05.02.00  |  | Micardis 20mg tablets (Boehringer Ingelheim Ltd)            |
|       | 02.05.05.02.00  |  | Micardis 40mg tablets (Boehringer Ingelheim Ltd)            |
|       | 02.05.05.02.00  |  | Micardis 80mg tablets (Boehringer Ingelheim Ltd)            |
|       | 02.02.01.00.00  |  | MicardisPlus 40mg/12.5mg tablets (Boehringer Ingelheim Ltd) |
|       | 02.02.01.00.00  |  | MicardisPlus 80mg/12.5mg tablets (Boehringer Ingelheim Ltd) |
|       | 02.02.01.00.00  |  | NATRAMID tablets 2.5mg [TRINITY]                            |
|       | 02.02.01.00.00  |  | Natrilix 2.5mg tablets (Servier Laboratories Ltd)           |
|       | 0202010P0BBABAD |  | Natrilix Sr M/R tablets 1.5 mg                              |
| b286. | 02020100        |  | Natrilix SR 1.5mg tablets (Servier Laboratories Ltd)        |
|       | 02.02.01.00.00  |  | Natrilix SR 1.5mg tablets (Servier Laboratories Ltd)        |
|       | 0202010P0BBABAD |  | NATRILIX SR TABLETS 1.5MG                                   |
|       | 0202010P0BBABAD |  | Natrilix Sr TABS 1.5MG                                      |
|       | 0202010P0BBAAAA |  | NATRILIX TABLETS 2.5MG                                      |
|       | 0202010P0BBAAAA |  | Natrilix TABS 2.5MG                                         |
|       | 0202010P0BBAAAA |  | Natrilix-P42 2.5mg tablet                                   |
|       | 02050502        |  | Olmесartan Medoxomil Tablets 10 mg                          |
|       | 02050502        |  | Olmесartan Medoxomil Tablets 20 mg                          |

|  |                 |  |                                                                                          |
|--|-----------------|--|------------------------------------------------------------------------------------------|
|  | 02050502        |  | Olmesartan Medoxomil Tablets 40 mg                                                       |
|  | 02.05.05.02.00  |  | Olmesartan medoxomil 10mg tablets                                                        |
|  | 02.05.05.02.00  |  | Olmesartan medoxomil 20mg / Hydrochlorothiazide 12.5mg tablets                           |
|  | 02.05.05.02.00  |  | Olmesartan medoxomil 20mg / Hydrochlorothiazide 25mg tablets                             |
|  | 02.05.05.02.00  |  | Olmesartan medoxomil 20mg tablets                                                        |
|  | 02.05.05.02.00  |  | Olmesartan medoxomil 40mg / Amlodipine 10mg tablets                                      |
|  | 02.05.05.02.00  |  | Olmesartan medoxomil 40mg / Amlodipine 5mg tablets                                       |
|  | 02.02.01.00.00  |  | Olmesartan medoxomil 40mg / Hydrochlorothiazide 12.5mg tablets                           |
|  | 02.05.05.02.00  |  | Olmesartan medoxomil 40mg tablets                                                        |
|  | 02050502        |  | OLMESARTAN MEDOXOMIL TABLETS 10MG                                                        |
|  | 02050502        |  | OLMESARTAN MEDOXOMIL TABLETS 20MG                                                        |
|  | 02050502        |  | OLMESARTAN MEDOXOMIL TABLETS 40MG                                                        |
|  | 02050502        |  | Olmesartan Medoxomil TABS 10MG                                                           |
|  | 02050502        |  | Olmesartan Medoxomil TABS 20MG                                                           |
|  | 02.02.01.00.00  |  | olmesartan medoxomil with amlodipine and hydrochlorothiazide tablets 20mg + 5mg + 12.5mg |
|  | 02.02.01.00.00  |  | olmesartan medoxomil with amlodipine and hydrochlorothiazide tablets 40mg + 10mg + 25mg  |
|  | 02.05.05.02.00  |  | Olmotec 10mg tablets (Daiichi Sankyo UK Ltd)                                             |
|  | 02.05.05.02.00  |  | Olmotec 20mg tablets (Daiichi Sankyo UK Ltd)                                             |
|  | 02.05.05.02.00  |  | Olmotec 40mg tablets (Daiichi Sankyo UK Ltd)                                             |
|  | 02050502        |  | Olmotec Plus Tablets 20 mg/25 mg                                                         |
|  | 02.05.05.02.00  |  | Olmotec Plus 20mg/12.5mg tablets (Daiichi Sankyo UK Ltd)                                 |
|  | 02.02.01.00.00  |  | Olmotec Plus 20mg/25mg tablets (Daiichi Sankyo UK Ltd)                                   |
|  | 02050502        |  | OLMETEC TABLETS 10MG                                                                     |
|  | 02050502        |  | OLMETEC TABLETS 20MG                                                                     |
|  | 0205051M0AAAAAA |  | PERINDOPRIL 2MG TAB                                                                      |
|  | 0205051M0AAABAB |  | PERINDOPRIL 4 MG                                                                         |
|  | 02050501        |  | Perindopril Arginine Tablets 10 mg                                                       |
|  | 02050501        |  | Perindopril Arginine Tablets 2.5 mg                                                      |
|  | 02050501        |  | Perindopril Arginine Tablets 5 mg                                                        |
|  | 02.05.05.01.00  |  | Perindopril arginine 10mg tablets                                                        |
|  | 02.05.05.01.00  |  | Perindopril arginine 2.5mg tablets                                                       |
|  | 02.05.05.01.00  |  | Perindopril arginine 5mg / Indapamide 1.25mg tablets                                     |
|  | 02.05.05.01.00  |  | Perindopril arginine 5mg tablets                                                         |
|  | 02050501        |  | Perindopril Arginine TABS 10MG                                                           |
|  | 02050501        |  | Perindopril Arginine TABS 5MG                                                            |
|  | 0205051M0AAAAAA |  | Perindopril Erbumine Tablets 2 mg                                                        |
|  | 0205051M0AAABAB |  | Perindopril Erbumine Tablets 4 mg                                                        |
|  | 02050501        |  | Perindopril Erbumine Tablets 8 mg                                                        |

|       |                 |  |                                                              |
|-------|-----------------|--|--------------------------------------------------------------|
| bi51. | 02050501        |  | Perindopril erbumine 2mg tablets                             |
|       | 02.05.05.01.00  |  | Perindopril erbumine 2mg tablets                             |
|       | 02.05.05.01.00  |  | Perindopril erbumine 2mg tablets (A A H Pharmaceuticals Ltd) |
|       | 02.05.05.01.00  |  | Perindopril erbumine 2mg tablets (Actavis UK Ltd)            |
|       | 02.05.05.01.00  |  | Perindopril erbumine 2mg tablets (Apotex UK Ltd)             |
|       | 02.05.05.01.00  |  | Perindopril erbumine 2mg tablets (Mylan Ltd)                 |
|       | 02.05.05.01.00  |  | Perindopril erbumine 2mg tablets (Teva UK Ltd)               |
|       | 02.05.05.01.00  |  | Perindopril erbumine 4mg / Amlodipine 5mg tablets            |
|       | 02.02.01.00.00  |  | Perindopril erbumine 4mg / Indapamide 1.25mg tablets         |
| bi52. | 02050501        |  | Perindopril erbumine 4mg tablets                             |
|       | 02.05.05.01.00  |  | Perindopril erbumine 4mg tablets                             |
|       | 02.05.05.01.00  |  | Perindopril erbumine 4mg tablets (A A H Pharmaceuticals Ltd) |
|       | 02.05.05.01.00  |  | Perindopril erbumine 4mg tablets (Actavis UK Ltd)            |
|       | 02.05.05.01.00  |  | Perindopril erbumine 4mg tablets (Apotex UK Ltd)             |
|       | 02.05.05.01.00  |  | Perindopril erbumine 4mg tablets (Mylan Ltd)                 |
|       | 02.05.05.01.00  |  | Perindopril erbumine 4mg tablets (Teva UK Ltd)               |
|       | 02.05.05.01.00  |  | Perindopril erbumine 4mg/5ml oral suspension                 |
| bi57. | 02050501        |  | Perindopril erbumine 8mg tablets                             |
|       | 02.05.05.01.00  |  | Perindopril erbumine 8mg tablets                             |
|       | 02.05.05.01.00  |  | Perindopril erbumine 8mg tablets (A A H Pharmaceuticals Ltd) |
|       | 02.05.05.01.00  |  | Perindopril erbumine 8mg tablets (Actavis UK Ltd)            |
|       | 02.05.05.01.00  |  | Perindopril erbumine 8mg tablets (Apotex UK Ltd)             |
|       | 02.05.05.01.00  |  | Perindopril erbumine 8mg tablets (Mylan Ltd)                 |
|       | 02.05.05.01.00  |  | Perindopril erbumine 8mg tablets (Teva UK Ltd)               |
|       | 0205051M0AAAAAA |  | Perindopril Erbumine TABLETS 2MG                             |
|       | 0205051M0AAAAAA |  | PERINDOPRIL ERBUMINE TABLETS 2MG                             |
|       | 0205051M0AAABAB |  | Perindopril Erbumine TABLETS 4MG                             |
|       | 0205051M0AAABAB |  | PERINDOPRIL ERBUMINE TABLETS 4MG                             |
|       | 02050501        |  | Perindopril Erbumine TABLETS 8MG                             |
|       | 02050501        |  | PERINDOPRIL ERBUMINE TABLETS 8MG                             |
| bi51. | 02050501        |  | PERINDOPRIL ERBUMINE tabs 2mg                                |
|       | 0205051M0AAAAAA |  | Perindopril Erbumine TABS 2MG                                |
| bi52. | 02050501        |  | PERINDOPRIL ERBUMINE tabs 4mg                                |
|       | 0205051M0AAABAB |  | Perindopril Erbumine TABS 4MG                                |
|       | 02050501        |  | Perindopril Erbumine TABS 8MG                                |
|       | 02.05.05.01.00  |  | PERINDOPRIL tablets 2mg [NEOLAB]                             |
|       | 02.05.05.01.00  |  | PERINDOPRIL tablets 2mg [SERVIER]                            |
|       | 02.05.05.01.00  |  | PERINDOPRIL tablets 4mg [NEOLAB]                             |
|       | 02.05.05.01.00  |  | PERINDOPRIL tablets 4mg [SERVIER]                            |



|       |                 |  |                                                        |
|-------|-----------------|--|--------------------------------------------------------|
|       | 02.05.05.01.00  |  | PERINDOPRIL tablets 8mg [NEOLAB]                       |
|       | 02.05.05.01.00  |  | PERINDOPRIL tablets 8mg [SERVIER]                      |
|       | 0205051M0AAAAAA |  | Perindopril Tert-Butylamine Tablets 2 mg               |
|       | 0205051M0AAABAB |  | Perindopril Tert-Butylamine Tablets 4 mg               |
|       | 02050501        |  | Perindopril Tert-Butylamine Tablets 8 mg               |
|       | 02.02.01.00.00  |  | Perindopril tosilate 5mg / Indapamide 1.25mg tablets   |
|       | 02050501        |  | PERINDOPRIL/INDAPAMIDE 4MG/1.25MG TABLETS              |
|       | 0205051Q0AAABAB |  | Quinapril Tablets 10 mg                                |
|       | 0205051Q0AAACAC |  | Quinapril Tablets 20 mg                                |
|       | 0205051Q0AAADAD |  | Quinapril Tablets 40 mg                                |
|       | 02.02.01.00.00  |  | Quinapril 10mg / Hydrochlorothiazide 12.5mg tablets    |
| bi42. | 02050501        |  | Quinapril 10mg tablets                                 |
|       | 02.05.05.01.00  |  | Quinapril 10mg tablets                                 |
|       | 02.05.05.01.00  |  | Quinapril 10mg tablets (Teva UK Ltd)                   |
| bi43. | 02050501        |  | Quinapril 20mg tablets                                 |
|       | 02.05.05.01.00  |  | Quinapril 20mg tablets                                 |
| bi4A. | 02050501        |  | Quinapril 40mg tablets                                 |
|       | 02.05.05.01.00  |  | Quinapril 40mg tablets                                 |
|       | 02.05.05.01.00  |  | Quinapril 5mg tablets                                  |
|       | 0205051Q0AAABAB |  | QUINAPRIL TABLETS 10MG                                 |
|       | 0205051Q0AAACAC |  | QUINAPRIL TABLETS 20MG                                 |
|       | 0205051Q0AAADAD |  | QUINAPRIL TABLETS 40MG                                 |
|       | 0205051Q0AAAAAA |  | QUINAPRIL TABLETS 5MG                                  |
|       | 0205051Q0AAABAB |  | Quinapril TABS 10MG                                    |
|       | 0205051Q0AAACAC |  | Quinapril TABS 20MG                                    |
|       | 0205051Q0AAADAD |  | Quinapril TABS 40MG                                    |
|       | 0205051Q0AAAAAA |  | Quinapril TABS 5MG                                     |
|       | 0205051R0AAAAAA |  | Ramipril Capsules 1.25 mg                              |
|       | 02050501        |  | Ramipril Capsules 10 mg                                |
|       | 0205051R0AAABAB |  | Ramipril Capsules 2.5 mg                               |
|       | 0205051R0AACAC  |  | Ramipril Capsules 5 mg                                 |
|       | 02050501        |  | Ramipril Suspension 5 mg/5 ml                          |
|       | 02050501        |  | Ramipril Tablets 1.25 mg                               |
|       | 02050501        |  | Ramipril Tablets 10 mg                                 |
|       | 02050501        |  | Ramipril Tablets 2.5 mg                                |
|       | 02050501        |  | Ramipril Tablets 5 mg                                  |
|       | 02050501        |  | RAMIPRIL - TABLETS 1.25MG                              |
|       | 02050501        |  | RAMIPRIL - TABLETS 10MG                                |
|       | 02050501        |  | Ramipril Titration pack 7 x 2.5 mg 21 x 5 mg 7 x 10 mg |
|       | 02050501        |  | Ramipril Titration Pack 7 x 2.5 mg 21 x 5 mg 7 x 10 mg |
| bi61. | 02050501        |  | Ramipril 1.25mg capsules                               |

|       |                 |  |                                                      |
|-------|-----------------|--|------------------------------------------------------|
|       | 02.05.05.01.00  |  | Ramipril 1.25mg capsules                             |
|       | 02.05.05.01.00  |  | Ramipril 1.25mg capsules (A A H Pharmaceuticals Ltd) |
|       | 02.05.05.01.00  |  | Ramipril 1.25mg capsules (Actavis UK Ltd)            |
|       | 02.05.05.01.00  |  | Ramipril 1.25mg capsules (Sandoz Ltd)                |
|       | 02.05.05.01.00  |  | Ramipril 1.25mg capsules (Teva UK Ltd)               |
| bi6B. | 02050501        |  | Ramipril 1.25mg tablets                              |
|       | 02.05.05.01.00  |  | Ramipril 1.25mg tablets                              |
|       | 02.05.05.01.00  |  | Ramipril 1.25mg tablets (Teva UK Ltd)                |
|       | 02.05.05.01.00  |  | Ramipril 1.25mg tablets (Zentiva)                    |
|       | 02050501        |  | RAMIPRIL 10 MG                                       |
|       | 02050501        |  | RAMIPRIL 10 MG CAPSULES 10 MG                        |
|       | 02050501        |  | RAMIPRIL 10 MGM TAB                                  |
|       | 02050501        |  | RAMIPRIL 10MG                                        |
|       | 02050501        |  | RAMIPRIL 10mg Cap                                    |
|       | 02050501        |  | RAMIPRIL 10MG CAP                                    |
|       | 02050501        |  | RAMIPRIL 10MG CAPS                                   |
| bi67. | 02050501        |  | Ramipril 10mg capsules                               |
|       | 02.05.05.01.00  |  | Ramipril 10mg capsules                               |
|       | 02050501        |  | Ramipril 10mg capsules                               |
|       | 02.05.05.01.00  |  | Ramipril 10mg capsules (A A H Pharmaceuticals Ltd)   |
|       | 02.05.05.01.00  |  | Ramipril 10mg capsules (Actavis UK Ltd)              |
|       | 02.05.05.01.00  |  | Ramipril 10mg capsules (Almus Pharmaceuticals Ltd)   |
|       | 02.05.05.01.00  |  | Ramipril 10mg capsules (Ranbaxy (UK) Ltd)            |
|       | 02.05.05.01.00  |  | Ramipril 10mg capsules (Sandoz Ltd)                  |
|       | 02.05.05.01.00  |  | Ramipril 10mg capsules (Teva UK Ltd)                 |
|       | 02.05.05.01.00  |  | Ramipril 10mg capsules (Zentiva)                     |
| bi6E. | 02050501        |  | Ramipril 10mg tablets                                |
|       | 02.05.05.01.00  |  | Ramipril 10mg tablets                                |
|       | 02050501        |  | RAMIPRIL 10MG TABLETS                                |
|       | 02.05.05.01.00  |  | Ramipril 10mg tablets (Actavis UK Ltd)               |
|       | 02.05.05.01.00  |  | Ramipril 10mg tablets (IVAX Pharmaceuticals UK Ltd)  |
|       | 02.05.05.01.00  |  | Ramipril 10mg tablets (Sandoz Ltd)                   |
|       | 02.05.05.01.00  |  | Ramipril 10mg tablets (Teva UK Ltd)                  |
|       | 02.05.05.01.00  |  | Ramipril 10mg/5ml oral suspension                    |
|       | 02050501        |  | Ramipril 2 TABLETS 2.5mg                             |
|       | 0205051R0AAABAB |  | RAMIPRIL 2.5 MG                                      |
|       | 0205051R0AAABAB |  | RAMIPRIL 2.5MG                                       |
| bi62. | 02050501        |  | Ramipril 2.5mg capsules                              |
|       | 02.05.05.01.00  |  | Ramipril 2.5mg capsules                              |
|       | 02.05.05.01.00  |  | Ramipril 2.5mg capsules (A A H Pharmaceuticals Ltd)  |
|       | 02.05.05.01.00  |  | Ramipril 2.5mg capsules (Actavis UK Ltd)             |

|       |                 |  |                                                   |
|-------|-----------------|--|---------------------------------------------------|
|       | 02.05.05.01.00  |  | Ramipril 2.5mg capsules (Ranbaxy (UK) Ltd)        |
|       | 02.05.05.01.00  |  | Ramipril 2.5mg capsules (Sandoz Ltd)              |
|       | 02.05.05.01.00  |  | Ramipril 2.5mg capsules (Teva UK Ltd)             |
|       | 02.05.05.01.00  |  | Ramipril 2.5mg capsules (Zentiva)                 |
| bi6C. | 02050501        |  | Ramipril 2.5mg tablets                            |
|       | 02.05.05.01.00  |  | Ramipril 2.5mg tablets                            |
|       | 02.05.05.01.00  |  | Ramipril 2.5mg tablets (Teva UK Ltd)              |
| bi6.. | 02050501        |  | Ramipril 2.5mg/5ml oral solution sugar free       |
|       | 02.05.05.01.00  |  | Ramipril 2.5mg/5ml oral solution sugar free       |
|       | 02.05.05.01.00  |  | Ramipril 2.5mg/5ml oral suspension                |
|       | 0205051R0AAACAC |  | RAMIPRIL 5 MG                                     |
|       | 02050501        |  | RAMIPRIL 5 MGM TAB                                |
| bi63. | 02050501        |  | Ramipril 5mg capsules                             |
|       | 02.05.05.01.00  |  | Ramipril 5mg capsules                             |
|       | 02.05.05.01.00  |  | Ramipril 5mg capsules (A A H Pharmaceuticals Ltd) |
|       | 02.05.05.01.00  |  | Ramipril 5mg capsules (Actavis UK Ltd)            |
|       | 02.05.05.01.00  |  | Ramipril 5mg capsules (Almus Pharmaceuticals Ltd) |
|       | 02.05.05.01.00  |  | Ramipril 5mg capsules (Arrow Generics Ltd)        |
|       | 02.05.05.01.00  |  | Ramipril 5mg capsules (Sandoz Ltd)                |
|       | 02.05.05.01.00  |  | Ramipril 5mg capsules (Teva UK Ltd)               |
| bi6D. | 02050501        |  | Ramipril 5mg tablets                              |
|       | 02.05.05.01.00  |  | Ramipril 5mg tablets                              |
|       | 02.05.05.01.00  |  | Ramipril 5mg tablets (Mylan Ltd)                  |
|       | 02.05.05.01.00  |  | Ramipril 5mg tablets (Teva UK Ltd)                |
|       | 02.05.05.01.00  |  | Ramipril 5mg/5ml oral solution                    |
|       | 02.05.05.01.00  |  | Ramipril 5mg/5ml oral suspension                  |
| bi61. | 02050501        |  | RAMIPRIL caps 1.25mg                              |
|       | 0205051R0AAAAAA |  | Ramipril CAPS 1.25MG                              |
| bi67. | 02050501        |  | RAMIPRIL caps 10mg                                |
|       | 02050501        |  | Ramipril CAPS 10mg                                |
|       | 02050501        |  | Ramipril CAPS 10MG                                |
| bi62. | 02050501        |  | RAMIPRIL caps 2.5mg                               |
|       | 0205051R0AAABAB |  | Ramipril CAPS 2.5mg                               |
|       | 0205051R0AAABAB |  | Ramipril CAPS 2.5MG                               |
| bi63. | 02050501        |  | RAMIPRIL caps 5mg                                 |
|       | 0205051R0AAACAC |  | Ramipril CAPS 5mg                                 |
|       | 0205051R0AAACAC |  | Ramipril CAPS 5MG                                 |
|       | 0205051R0AAAAAA |  | Ramipril CAPSULES 1.25MG                          |
|       | 0205051R0AAAAAA |  | RAMIPRIL CAPSULES 1.25MG                          |
|       | 02050501        |  | Ramipril CAPSULES 10MG                            |
|       | 02050501        |  | RAMIPRIL CAPSULES 10MG                            |

|  |                 |  |                                      |
|--|-----------------|--|--------------------------------------|
|  | 0205051R0AAABAB |  | Ramipril CAPSULES 2.5MG              |
|  | 0205051R0AAABAB |  | RAMIPRIL CAPSULES 2.5MG              |
|  | 02.05.05.01.00  |  | ramipril capsules 2.5mg + 5mg + 10mg |
|  | 0205051R0AAABAB |  | RAMIPRIL CAPSULES 2.5MGS             |
|  | 0205051R0AAACAC |  | Ramipril CAPSULES 5MG                |
|  | 0205051R0AAACAC |  | RAMIPRIL CAPSULES 5MG                |
|  | 02050501        |  | RAMIPRIL capsules CAP 10mg-P42 0     |
|  | 02050501        |  | RAMIPRIL TABLETS 2.5MG               |
|  | 02050501        |  | RAMIPRIL TABLETS 1.25 MGM            |
|  | 02050501        |  | RAMIPRIL TABLETS 1.25MG              |
|  | 02050501        |  | RAMIPRIL TABLETS 10 MG               |
|  | 02050501        |  | RAMIPRIL TABLETS 10 MGM              |
|  | 02050501        |  | RAMIPRIL TABLETS 10 MGS              |
|  | 02050501        |  | Ramipril TABLETS 10MG                |
|  | 02050501        |  | RAMIPRIL TABLETS 10mg                |
|  | 02050501        |  | RAMIPRIL TABLETS 10MG                |
|  | 02050501        |  | RAMIPRIL TABLETS 2.5 MG              |
|  | 02050501        |  | RAMIPRIL TABLETS 2.5 MGM             |
|  | 02050501        |  | Ramipril TABLETS 2.5MG               |
|  | 02050501        |  | RAMIPRIL TABLETS 2.5mg               |
|  | 02050501        |  | RAMIPRIL TABLETS 2.5MG               |
|  | 02.05.05.01.00  |  | ramipril tablets 2.5mg + 5mg + 10mg  |
|  | 02050501        |  | RAMIPRIL TABLETS 5 MG                |
|  | 02050501        |  | RAMIPRIL TABLETS 5 MGM               |
|  | 02050501        |  | RAMIPRIL TABLETS 5 MGS               |
|  | 02050501        |  | Ramipril TABLETS 5MG                 |
|  | 02050501        |  | RAMIPRIL TABLETS 5MG                 |
|  | 02050501        |  | RAMIPRIL TABLETS TABLETS 2.5MG       |
|  | 02050501        |  | ramipril TABS 1.25                   |
|  | 02050501        |  | Ramipril TABS 1.25mg                 |
|  | 02050501        |  | Ramipril TABS 1.25MG                 |
|  | 02050501        |  | Ramipril TABS 10 mg                  |
|  | 02050501        |  | ramipril TABS 10mg                   |
|  | 02050501        |  | Ramipril TABS 10mg                   |
|  | 02050501        |  | Ramipril TABS 10MG                   |
|  | 02050501        |  | ramipril TABS 2.5mg                  |
|  | 02050501        |  | Ramipril TABS 2.5mg                  |
|  | 02050501        |  | Ramipril TABS 2.5MG                  |
|  | 02050501        |  | RAMIPRIL TABS 2.5mg                  |
|  | 02050501        |  | Ramipril TABS 2.5mgs                 |
|  | 02050501        |  | Ramipril TABS 5 mg                   |

|       |                 |  |                                                             |
|-------|-----------------|--|-------------------------------------------------------------|
|       | 02050501        |  | ramipril TABS 5mg                                           |
|       | 02050501        |  | Ramipril TABS 5mg                                           |
|       | 02050501        |  | Ramipril TABS 5MG                                           |
|       | 02050501        |  | RAMIPRIL TABS TABS 10MG                                     |
|       | 02050501        |  | RAMIPRIL TABS TABS 2.5MG                                    |
|       | 02050501        |  | RAMIPRIL TABS TABS 5MG                                      |
|       | 02050501        |  | Ramipril Titration Pack 35 Capsules CAPS                    |
|       | 02050501        |  | RAMIPRIL TITRATION PACK 35 CAPSULES CAPS                    |
|       | 02050501        |  | RAMIPRIL TITRATION PACK 35 TABLETS TABLETS                  |
|       | 02050502        |  | Sacubitril And Valsartan Tablets 24 mg + 26 mg              |
|       | 02050502        |  | Sacubitril And Valsartan Tablets 49 mg + 51 mg              |
|       | 02050502        |  | Sacubitril And Valsartan Tablets 97 mg + 103 mg             |
|       | 02.05.05.02.00  |  | Sevikar 20mg/5mg tablets (Daiichi Sankyo UK Ltd)            |
|       | 02.02.01.00.00  |  | Sevikar HCT 20mg/5mg/12.5mg tablets (Daiichi Sankyo UK Ltd) |
|       | 02.05.05.02.00  |  | Sevikar HCT 40mg/5mg/12.5mg tablets (Daiichi Sankyo UK Ltd) |
|       | 02.02.03.00.00  |  | SPIROLONE tablets 50mg [BERK]                               |
|       | 020203          |  | Spironolactone Oral solution 25 mg/5 ml                     |
|       | 0202030S0AAAVAV |  | Spironolactone Tablets 100 mg                               |
|       | 0202030S0AAATAT |  | Spironolactone Tablets 25 mg                                |
|       | 0202030S0AAAUU  |  | Spironolactone Tablets 50 mg                                |
| b433. | 02020300        |  | Spironolactone 100mg tablets                                |
|       | 02.02.03.00.00  |  | Spironolactone 100mg tablets                                |
|       | 02.02.03.00.00  |  | Spironolactone 100mg tablets (A A H Pharmaceuticals Ltd)    |
|       | 02.02.03.00.00  |  | Spironolactone 100mg tablets (Almus Pharmaceuticals Ltd)    |
|       | 02.02.03.00.00  |  | Spironolactone 100mg tablets (Teva UK Ltd)                  |
| b431. | 02020300        |  | Spironolactone 25mg tablets                                 |
|       | 02.02.03.00.00  |  | Spironolactone 25mg tablets                                 |
|       | 02.02.03.00.00  |  | Spironolactone 25mg tablets (A A H Pharmaceuticals Ltd)     |
|       | 02.02.03.00.00  |  | Spironolactone 25mg tablets (Actavis UK Ltd)                |
|       | 02.02.03.00.00  |  | Spironolactone 25mg tablets (Almus Pharmaceuticals Ltd)     |
|       | 02.02.03.00.00  |  | Spironolactone 25mg tablets (Teva UK Ltd)                   |
|       | 02.02.03.00.00  |  | Spironolactone 25mg/5ml oral suspension                     |
|       | 02.02.03.00.00  |  | Spironolactone 50mg / Furosemide 20mg capsules              |
| b432. | 02020300        |  | Spironolactone 50mg tablets                                 |
|       | 02.02.03.00.00  |  | Spironolactone 50mg tablets                                 |
|       | 02.02.03.00.00  |  | Spironolactone 50mg tablets (Almus Pharmaceuticals Ltd)     |
|       | 02.02.03.00.00  |  | Spironolactone 50mg tablets (Teva UK Ltd)                   |
|       | 02.02.03.00.00  |  | Spironolactone 50mg/5ml oral suspension                     |
|       | 02.02.03.00.00  |  | Spironolactone 5mg/5ml oral suspension                      |

|       |                 |  |                                                                |
|-------|-----------------|--|----------------------------------------------------------------|
|       | 02.02.03.00.00  |  | spironolactone capsules 100mg                                  |
|       | 02.02.03.00.00  |  | spironolactone suspension sugar-free 100mg/5ml                 |
|       | 02.02.03.00.00  |  | spironolactone suspension sugar-free 10mg/5ml                  |
|       | 02.02.03.00.00  |  | spironolactone suspension sugar-free 25mg/5ml                  |
|       | 02.02.03.00.00  |  | spironolactone suspension sugar-free 50mg/5ml                  |
|       | 0202030S0AAAVAV |  | Spironolactone TABLETS 100MG                                   |
|       | 0202030S0AAAVAV |  | SPIRONOLACTONE TABLETS 100MG                                   |
|       | 0202030S0AAATAT |  | Spironolactone TABLETS 25MG                                    |
|       | 0202030S0AAATAT |  | SPIRONOLACTONE TABLETS 25MG                                    |
|       | 0202030S0AAAUU  |  | SPIRONOLACTONE TABLETS 50MG                                    |
|       | 0202030S0AAAVAV |  | Spironolactone TABS 100MG                                      |
|       | 0202030S0AAATAT |  | Spironolactone TABS 25MG                                       |
|       | 0202030S0AAAUU  |  | Spironolactone TABS 50MG                                       |
|       | 0202030S0AAAUU  |  | Spironolactone-P42 50mg tablet                                 |
|       | 02.02.03.00.00  |  | Spirospare 100 tablets (Ashbourne Pharmaceuticals Ltd)         |
|       | 02.05.05.01.00  |  | Staril 10mg tablets (Bristol-Myers Squibb Pharmaceuticals Ltd) |
|       | 02.05.05.01.00  |  | Staril 20mg tablets (Bristol-Myers Squibb Pharmaceuticals Ltd) |
|       | 0205051JOBBAAAA |  | Staril TABS 10MG                                               |
|       | 0205051JOBABAB  |  | Staril TABS 20MG                                               |
|       | 02050501        |  | Tanatril Tablets 10 mg                                         |
|       | 02.05.05.01.00  |  | Tanatril 10mg tablets (Chiesi Ltd)                             |
|       | 02050501        |  | TANATRIL TABLETS 10MG                                          |
|       | 02.05.05.01.00  |  | Tarka modified-release capsules (Abbott Laboratories Ltd)      |
|       | 02050502        |  | Telmisartan Tablets 20 mg                                      |
|       | 02050502        |  | Telmisartan Tablets 40 mg                                      |
|       | 02050502        |  | Telmisartan Tablets 80 mg                                      |
|       | 02.05.05.02.00  |  | Telmisartan 20mg tablets                                       |
|       | 02.05.05.02.00  |  | Telmisartan 40mg / Hydrochlorothiazide 12.5mg tablets          |
| bk81. | 02050502        |  | Telmisartan 40mg tablets                                       |
|       | 02.05.05.02.00  |  | Telmisartan 40mg tablets                                       |
|       | 02.02.01.00.00  |  | Telmisartan 80mg / Hydrochlorothiazide 12.5mg tablets          |
|       | 02.02.01.00.00  |  | Telmisartan 80mg / Hydrochlorothiazide 25mg tablets            |
| bk82. | 02050502        |  | Telmisartan 80mg tablets                                       |
|       | 02.05.05.02.00  |  | Telmisartan 80mg tablets                                       |
|       | 02050502        |  | TELMISARTAN TABLETS 20MG                                       |
|       | 02050502        |  | TELMISARTAN TABLETS 40MG                                       |
|       | 02050502        |  | TELMISARTAN TABLETS 80MG                                       |
|       | 02050502        |  | Telmisartan TABS 20MG                                          |
|       | 02050502        |  | Telmisartan TABS 40MG                                          |
|       | 02050502        |  | Telmisartan TABS 80MG                                          |

|       |                 |  |                                                              |
|-------|-----------------|--|--------------------------------------------------------------|
|       | 02.05.05.02.00  |  | telmisartan with amlodipine (roi) tablets 80mg + 5mg         |
|       | 02050502        |  | Teveten Tablets 600 mg                                       |
| bk91. | 02050502        |  | Teveten 300mg tablets (Abbott Healthcare Products Ltd)       |
|       | 02.05.05.02.00  |  | Teveten 300mg tablets (BGP Products Ltd)                     |
|       | 02.05.05.02.00  |  | Teveten 600mg tablets (BGP Products Ltd)                     |
|       | 02050502        |  | Teveten TABS 600MG                                           |
|       | 0202020U0AAAAAA |  | Torasemide Tablets 2.5 mg                                    |
|       | 0202020U0AAABAB |  | Torasemide Tablets 5 mg                                      |
| b358. | 02020200        |  | Torasemide 10mg tablets                                      |
|       | 02.02.02.00.00  |  | Torasemide 10mg tablets                                      |
| b356. | 02020200        |  | Torasemide 2.5mg tablets                                     |
|       | 02.02.02.00.00  |  | Torasemide 2.5mg tablets                                     |
|       | 02.02.02.00.00  |  | Torasemide 5mg tablets                                       |
|       | 0202020U0AAAAAA |  | TORASEMIDE TABLETS 2.5MG                                     |
|       | 02.02.02.00.00  |  | Torem 2.5mg tablets (Meda Pharmaceuticals Ltd)               |
|       | 02.02.02.00.00  |  | Torem 5mg tablets (Meda Pharmaceuticals Ltd)                 |
|       | 0205051U0AAACAC |  | Trandolapril Capsules 2 mg                                   |
|       | 02050501        |  | Trandolapril Capsules 4 mg                                   |
| bi92. | 02050501        |  | Trandolapril 1mg capsules                                    |
|       | 02.05.05.01.00  |  | Trandolapril 1mg capsules                                    |
|       | 02.05.05.01.00  |  | Trandolapril 1mg capsules (Actavis UK Ltd)                   |
| bi93. | 02050501        |  | Trandolapril 2mg capsules                                    |
|       | 02.05.05.01.00  |  | Trandolapril 2mg capsules                                    |
| bi9z. | 02050501        |  | Trandolapril 4mg capsules                                    |
|       | 02.05.05.01.00  |  | Trandolapril 4mg capsules                                    |
| bi91. | 02050501        |  | Trandolapril 500microgram capsules                           |
|       | 02.05.05.01.00  |  | Trandolapril 500microgram capsules                           |
|       | 0205051U0AAABAB |  | Trandolapril CAPS 1MG                                        |
|       | 0205051U0AAACAC |  | Trandolapril CAPS 2MG                                        |
|       | 02050501        |  | Trandolapril CAPS 4MG                                        |
|       | 0205051U0AAAAAA |  | Trandolapril CAPS 500MICROGRAMS                              |
|       | 0205051U0AAABAB |  | Trandolapril CAPSULES 1MG                                    |
|       | 0205051U0AAABAB |  | TRANDOLAPRIL CAPSULES 1MG                                    |
|       | 0205051U0AAACAC |  | Trandolapril CAPSULES 2MG                                    |
|       | 0205051U0AAACAC |  | TRANDOLAPRIL CAPSULES 2MG                                    |
|       | 02050501        |  | Trandolapril CAPSULES 4MG                                    |
|       | 02050501        |  | TRANDOLAPRIL CAPSULES 4MG                                    |
|       | 0205051U0AAAAAA |  | TRANDOLAPRIL CAPSULES 500MICROGRAMS                          |
|       | 02050501        |  | Tritace Tablet Titration Pack 7 x 2.5 mg 21 x 5 mg 7 x 10 mg |
|       | 02.05.05.01.00  |  | Tritace 1.25mg capsules (Aventis Pharma)                     |
|       | 02.05.05.01.00  |  | Tritace 1.25mg tablets (Sanofi)                              |

|       |                  |  |                                                      |
|-------|------------------|--|------------------------------------------------------|
|       | 02.05.05.01.00   |  | Tritace 10mg capsules (Sanofi)                       |
|       | 02.05.05.01.00   |  | Tritace 10mg tablets (Sanofi)                        |
|       | 02.05.05.01.00   |  | Tritace 2.5mg capsules (Sanofi)                      |
|       | 02.05.05.01.00   |  | Tritace 2.5mg tablets (Sanofi)                       |
|       | 02.05.05.01.00   |  | Tritace 5mg capsules (Sanofi)                        |
|       | 02.05.05.01.00   |  | Tritace 5mg tablets (Sanofi)                         |
|       | 02050501         |  | Tritace CAPS 1.25MG                                  |
|       | 02050501         |  | Tritace CAPS 5MG                                     |
|       | 02050501         |  | TRITACE TABLETS 10MG                                 |
|       | 02050501         |  | TRITACE TABLETS 5MG                                  |
|       | 02050501         |  | TRITACE TITRATION PACK 35 CAPSULES CAPS              |
|       | 02.05.05.01.00   |  | Tritace titration pack capsules (Sanofi)             |
| bi6o. | 02050501         |  | Tritace titration pack tablets (Sanofi)              |
|       | 02.05.05.01.00   |  | Tritace titration pack tablets (Sanofi)              |
|       | 0205052V0AAAACAC |  | Valsartan Capsules 160 mg                            |
|       | 0205052V0AAAAAAA |  | Valsartan Capsules 40 mg                             |
|       | 0205052V0AAAABAB |  | Valsartan Capsules 80 mg                             |
|       | 02050502         |  | Valsartan Tablets 160 mg                             |
|       | 02050502         |  | Valsartan Tablets 320 mg                             |
|       | 02050502         |  | Valsartan Tablets 40 mg                              |
| bk4z. | 02050502         |  | Valsartan 160mg / Hydrochlorothiazide 12.5mg tablets |
| bk4z. | 02050504         |  | Valsartan 160mg / Hydrochlorothiazide 12.5mg tablets |
|       | 02.05.05.02.00   |  | Valsartan 160mg / Hydrochlorothiazide 12.5mg tablets |
|       | 02.02.01.00.00   |  | Valsartan 160mg / Hydrochlorothiazide 25mg tablets   |
| bk43. | 02050502         |  | Valsartan 160mg capsules                             |
|       | 02.05.05.02.00   |  | Valsartan 160mg capsules                             |
|       | 02.05.05.02.00   |  | Valsartan 160mg capsules (Actavis UK Ltd)            |
|       | 02.05.05.02.00   |  | Valsartan 160mg capsules (Teva UK Ltd)               |
|       | 02.05.05.02.00   |  | Valsartan 160mg tablets                              |
| bk4v. | 02050502         |  | Valsartan 320mg tablets                              |
|       | 02.05.05.02.00   |  | Valsartan 320mg tablets                              |
|       | 02.05.05.02.00   |  | Valsartan 320mg tablets (Actavis UK Ltd)             |
|       | 02.05.05.02.00   |  | Valsartan 320mg tablets (Teva UK Ltd)                |
| bk41. | 02050502         |  | Valsartan 40mg capsules                              |
|       | 02.05.05.02.00   |  | Valsartan 40mg capsules                              |
|       | 02.05.05.02.00   |  | Valsartan 40mg capsules (Teva UK Ltd)                |
| bk4w. | 02050502         |  | Valsartan 40mg tablets                               |
|       | 02.05.05.02.00   |  | Valsartan 40mg tablets                               |
|       | 02.05.05.02.00   |  | Valsartan 40mg tablets (Actavis UK Ltd)              |
|       | 02.05.05.02.00   |  | Valsartan 40mg tablets (Teva UK Ltd)                 |
| bk4x. | 02050504         |  | Valsartan 80mg / Hydrochlorothiazide 12.5mg tablets  |



|       |                 |  |                                                                      |
|-------|-----------------|--|----------------------------------------------------------------------|
|       | 02.02.01.00.00  |  | Valsartan 80mg / Hydrochlorothiazide 12.5mg tablets                  |
|       | 02.05.05.02.00  |  | Valsartan 80mg / Hydrochlorothiazide 12.5mg tablets (Actavis UK Ltd) |
| bk42. | 02050502        |  | Valsartan 80mg capsules                                              |
|       | 02.05.05.02.00  |  | Valsartan 80mg capsules                                              |
|       | 02.05.05.02.00  |  | Valsartan 80mg capsules (Actavis UK Ltd)                             |
|       | 02.05.05.02.00  |  | Valsartan 80mg capsules (Teva UK Ltd)                                |
| bk4s. | 02050502        |  | Valsartan 80mg tablets                                               |
|       | 02.05.05.02.00  |  | Valsartan 80mg tablets                                               |
|       | 02050502        |  | Valsartan And Hydrochlorothiazide Tablets 160 mg + 12.5 mg           |
| bk43. | 02050502        |  | VALSARTAN caps 160mg                                                 |
|       | 0205052V0AAACAC |  | Valsartan CAPS 160MG                                                 |
|       | 0205052V0AAAAAA |  | Valsartan CAPS 40MG                                                  |
|       | 0205052V0AAABAB |  | Valsartan CAPS 80MG                                                  |
|       | 0205052V0AAACAC |  | VALSARTAN CAPSULES 160MG                                             |
|       | 0205052V0AAAAAA |  | VALSARTAN CAPSULES 40MG                                              |
|       | 0205052V0AAABAB |  | VALSARTAN CAPSULES 80MG                                              |
|       | 02050502        |  | VALSARTAN TABLETS 40MG                                               |
|       | 02050502        |  | Valsartan TABS 320MG                                                 |
|       | 02.05.05.01.00  |  | Vascace 1mg tablets (Roche Products Ltd)                             |
|       | 02.05.05.01.00  |  | Vascace 2.5mg tablets (Roche Products Ltd)                           |
|       | 02.05.05.01.00  |  | Vascace 5mg tablets (Roche Products Ltd)                             |
|       | 0202010Y0AAAAAA |  | Xipamide Tablets 20 mg                                               |
|       | 02.02.01.00.00  |  | Xipamide 20mg tablets                                                |
|       | 0202010Y0AAAAAA |  | Xipamide TABS 20MG                                                   |
| bi3s. | 02050501        |  | Zestoretic 10 tablets (AstraZeneca UK Ltd)                           |
|       | 02.02.01.00.00  |  | Zestoretic 10 tablets (AstraZeneca UK Ltd)                           |
|       | 0205051K0BBABAB |  | Zestoretic 10 TABS                                                   |
|       | 02.05.05.01.00  |  | ZESTORETIC 10-tablets 10mg + 12.5mg [ASTRAZENECA]                    |
|       | 0205051K0BBAAAA |  | Zestoretic 20 Tablets                                                |
|       | 0205051K0BBAAAA |  | ZESTORETIC 20 TABLETS                                                |
| bi3n. | 02050501        |  | Zestoretic 20 tablets (AstraZeneca UK Ltd)                           |
|       | 02.02.01.00.00  |  | Zestoretic 20 tablets (AstraZeneca UK Ltd)                           |
|       | 0205051K0BBAAAA |  | Zestoretic 20 TABS                                                   |
|       | 02.05.05.01.00  |  | ZESTORETIC 20-tablets 20mg + 12.5mg [ASTRAZENECA]                    |
|       | 0205051L0BBACAC |  | Zestril Tablets 10 mg                                                |
| bi3h. | 02050501        |  | Zestril 10mg tablets (AstraZeneca UK Ltd)                            |
|       | 02.05.05.01.00  |  | Zestril 10mg tablets (AstraZeneca UK Ltd)                            |
|       | 02.05.05.01.00  |  | Zestril 2.5mg tablets (AstraZeneca UK Ltd)                           |
|       | 02.05.05.01.00  |  | Zestril 20mg tablets (AstraZeneca UK Ltd)                            |
| bi3f. | 02050501        |  | Zestril 5mg tablets (AstraZeneca UK Ltd)                             |

|                 |                 |  |                                                                                                     |
|-----------------|-----------------|--|-----------------------------------------------------------------------------------------------------|
|                 | 02.05.05.01.00  |  | Zestril 5mg tablets (AstraZeneca UK Ltd)                                                            |
|                 | 0205051LOBBACAC |  | ZESTRIL TABLETS 10MG                                                                                |
|                 | 0205051LOBBADAD |  | ZESTRIL TABLETS 20MG                                                                                |
|                 | 0205051LOBBACAC |  | Zestril TABS 10MG                                                                                   |
|                 | 0205051LOBBADAD |  | Zestril TABS 20MG                                                                                   |
|                 | 0205051LOBBABAB |  | Zestril TABS 5MG                                                                                    |
|                 | 0205051LOBBABAB |  | Zestril-P42 5mg tablet                                                                              |
| <b>Diabetes</b> |                 |  |                                                                                                     |
|                 | 06010102        |  | Abasaglar Solution for injection 100 units/ml 3 ml cartridge                                        |
| f29c.           | 06010102        |  | Abasaglar KwikPen 100units/ml solution for injection 3ml ...                                        |
|                 | 06.01.01.02.00  |  | Abasaglar KwikPen 100units/ml solution for injection 3ml pre-filled pen (Eli Lilly and Company Ltd) |
|                 | 0601023A0AAABAB |  | Acarbose Tablets 100 mg                                                                             |
|                 | 0601023A0AAAAAA |  | Acarbose Tablets 50 mg                                                                              |
|                 | 06.01.02.03.00  |  | Acarbose 100mg tablets                                                                              |
|                 | 06.01.02.03.00  |  | Acarbose 50mg tablets                                                                               |
|                 | 0601023A0AAABAB |  | ACARBOSE TABLETS 100MG                                                                              |
|                 | 0601023A0AAAAAA |  | ACARBOSE TABLETS 50MG                                                                               |
|                 | 0601023A0AAABAB |  | Acarbose TABS 100MG                                                                                 |
|                 | 0601023A0AAAAAA |  | Acarbose TABS 50MG                                                                                  |
|                 | 060106          |  | Accu-Chek Aviva Blood Glucose Testing System                                                        |
|                 | 060106          |  | Accu-Chek Compact Meter                                                                             |
|                 | 060106          |  | ACCU-CHEK COMPACT GLUCOSE STRIPS COMPACT GLUCOSE STRIPS                                             |
|                 | 060106          |  | Accu-Chek Compact Plus Blood Glucose Testing System                                                 |
| ft51.           | 06010203        |  | Actos 15mg tablets (Takeda UK Ltd)                                                                  |
|                 | 06.01.02.03.00  |  | Actos 15mg tablets (Takeda UK Ltd)                                                                  |
|                 | 06.01.02.03.00  |  | Actos 30mg tablets (Takeda UK Ltd)                                                                  |
| ft53.           | 06010203        |  | Actos 45mg tablets (Takeda UK Ltd)                                                                  |
|                 | 06.01.02.03.00  |  | Actos 45mg tablets (Takeda UK Ltd)                                                                  |
|                 | 06.01.03.00.00  |  | Actrapid 100units/ml solution for injection 10ml vials (Novo Nordisk Ltd)                           |
|                 | 06.01.01.01.00  |  | ACTRAPID injection 100 units/ml [NOVO]                                                              |
|                 | 06.01.01.01.00  |  | ACTRAPID MC injection 100 units/ml [ARUN]                                                           |
|                 | 06.01.01.01.00  |  | Actrapid NovoLet 100units/ml solution for injection (Novo Nordisk Ltd)                              |
|                 | 06010101        |  | Actrapid Novolet Pen 3ml INJ 100UNITS/ML                                                            |
|                 | 06010101        |  | Actrapid Penfill Injection 100 units/ml 3 ml cartridge                                              |
|                 | 06.01.01.01.00  |  | ACTRAPID PENFILL 100 units/ml [NOVO]                                                                |
|                 | 06.01.01.01.00  |  | Actrapid Penfill 100units/ml solution for injection 3ml cartridges (Novo Nordisk Ltd)               |
|                 | 06010101        |  | ACTRAPID PENFILL 3ML INJ 100UNITS/ML                                                                |

|       |                |  |                                                                                |
|-------|----------------|--|--------------------------------------------------------------------------------|
|       | 06010101       |  | ACTRAPID PRELOADED PEN 3ML INJ 100UNITS/ML 5                                   |
|       | 06010203       |  | Alogliptin Tablets 25 mg                                                       |
|       | 06.01.02.03.00 |  | Alogliptin 12.5mg / Metformin 1g tablets                                       |
| ftk4. | 06010203       |  | Alogliptin 12.5mg tablets                                                      |
|       | 06.01.02.03.00 |  | Alogliptin 12.5mg tablets                                                      |
| ftk6. | 06010203       |  | Alogliptin 25mg tablets                                                        |
|       | 06.01.02.03.00 |  | Alogliptin 25mg tablets                                                        |
| ftk2. | 06010203       |  | Alogliptin 6.25mg tablets                                                      |
|       | 06.01.02.03.00 |  | Alogliptin 6.25mg tablets                                                      |
|       | 06.01.02.01.00 |  | Amaryl 1mg tablets (Zentiva)                                                   |
|       | 06.01.02.01.00 |  | Amaryl 2mg tablets (Zentiva)                                                   |
|       | 06.01.02.01.00 |  | Amaryl 3mg tablets (Zentiva)                                                   |
|       | 06.01.02.01.00 |  | Amaryl 4mg tablets (Zentiva)                                                   |
|       | 06.01.02.01.00 |  | AMARYL tablets 1mg [AVENTIS]                                                   |
|       | 06.01.02.01.00 |  | AMARYL tablets 2mg [AVENTIS]                                                   |
|       | 06.01.02.01.00 |  | AMARYL tablets 3mg [AVENTIS]                                                   |
|       | 06.01.02.01.00 |  | AMARYL tablets 4mg [AVENTIS]                                                   |
|       | 06010101       |  | Apidra Injection 100 units/ml 3 ml cartridge                                   |
| f151. | 06010101       |  | Apidra 100units/ml solution for injection 10ml vials (San...                   |
|       | 06.01.01.01.00 |  | Apidra 100units/ml solution for injection 10ml vials (Sanofi)                  |
|       | 06.01.01.01.00 |  | Apidra 100units/ml solution for injection 3ml cartridges (Sanofi)              |
|       | 06.01.01.01.00 |  | Apidra 100units/ml solution for injection 3ml OptiClik cartridges (Sanofi)     |
|       | 06.01.01.01.00 |  | Apidra 100units/ml solution for injection 3ml pre-filled OptiSet pen (Sanofi)  |
|       | 06.01.01.01.00 |  | Apidra 100units/ml solution for injection 3ml pre-filled SoloStar pen (Sanofi) |
|       | 06010101       |  | Apidra Solostar Pre-filled Disposable Pen 100 units/ml 3 ml pen                |
|       | 06010203       |  | Avandamet Tablets 1 mg + 500 mg                                                |
|       | 06010203       |  | Avandamet Tablets 2 mg + 1 gram                                                |
|       | 06010203       |  | Avandamet Tablets 2 mg + 500 mg                                                |
|       | 06010203       |  | Avandamet Tablets 4 mg + 1 gram                                                |
|       | 06.01.02.03.00 |  | Avandamet 1mg/500mg tablets (GlaxoSmithKline UK Ltd)                           |
|       | 06010203       |  | AVANDAMET 2MG/1000MG TABLETS                                                   |
|       | 06.01.02.03.00 |  | Avandamet 2mg/1000mg tablets (GlaxoSmithKline UK Ltd)                          |
|       | 06010203       |  | Avandamet 2mg/1000mg TABS                                                      |
|       | 06.01.02.03.00 |  | Avandamet 2mg/500mg tablets (GlaxoSmithKline UK Ltd)                           |
|       | 06010203       |  | Avandamet 2mg/500mg TABS                                                       |
|       | 06010203       |  | AVANDAMET 4MG/1000MG TABLETS                                                   |

|       |                |  |                                                                                                                    |
|-------|----------------|--|--------------------------------------------------------------------------------------------------------------------|
|       | 06.01.02.03.00 |  | Avandamet 4mg/1000mg tablets (GlaxoSmithKline UK Ltd)                                                              |
|       | 06010203       |  | Avandamet 4mg/1000mg TABS                                                                                          |
|       | 06010203       |  | AVANDAMET TABLETS 1G:2MG                                                                                           |
|       | 06010203       |  | AVANDAMET TABLETS 500MG : 1MG                                                                                      |
|       | 06010203       |  | AVANDAMET TABLETS 500MG : 2MG                                                                                      |
|       | 06010203       |  | AVANDAMET TABS 1MG/500MG                                                                                           |
|       | 06010203       |  | avandamet TABS 2/1000                                                                                              |
|       | 06010203       |  | Avandamet TABS 2/1000                                                                                              |
|       | 06010203       |  | Avandamet TABS 2mg/500mg                                                                                           |
|       | 06010203       |  | Avandamet TABS 4/1000                                                                                              |
|       | 06.01.02.03.00 |  | Avandia 4mg tablets (GlaxoSmithKline UK Ltd)                                                                       |
|       | 06.01.02.03.00 |  | Avandia 8mg tablets (GlaxoSmithKline UK Ltd)                                                                       |
|       | 06.01.02.02.00 |  | Bolamyn SR 1000mg tablets (Teva UK Ltd)                                                                            |
|       | 06.01.02.02.00 |  | Bolamyn SR 500mg tablets (Teva UK Ltd)                                                                             |
|       | 06010203       |  | Bydureon Powder and solvent for suspension for injection 2 mg pen                                                  |
|       | 06010203       |  | Bydureon Powder and solvent for suspension for injection 2 mg vial                                                 |
|       | 06010203       |  | Bydureon Prolonged release suspension for injection 2 mg pen                                                       |
| ft94. | 06010203       |  | Bydureon 2mg powder and solvent for prolonged-release sus...                                                       |
|       | 06.01.02.03.00 |  | Bydureon 2mg powder and solvent for prolonged-release suspension for injection pre-filled pen (AstraZeneca UK Ltd) |
| ft93. | 06010203       |  | Bydureon 2mg powder and solvent for suspension for inject...                                                       |
| ft94. | 06010203       |  | Bydureon 2mg powder and solvent for suspension for inject...                                                       |
|       | 06.01.02.03.00 |  | Bydureon 2mg powder and solvent for suspension for prolonged-release injection vials (AstraZeneca UK Ltd)          |
|       | 06010203       |  | Byetta Injection (Pre-Filled Pen) 10 micrograms/dose 60 dose pen                                                   |
|       | 06010203       |  | Byetta Injection (Pre-Filled Pen) 5 micrograms/dose 60 dose pen                                                    |
| ft92. | 06010203       |  | Byetta 10micrograms/0.04ml solution for injection 2.4ml p...                                                       |
|       | 06.01.02.03.00 |  | Byetta 10micrograms/0.04ml solution for injection 2.4ml pre-filled disposable devices (AstraZeneca UK Ltd)         |
| ft91. | 06010203       |  | Byetta 5micrograms/0.02ml solution for injection 1.2ml pr...                                                       |
|       | 06.01.02.03.00 |  | Byetta 5micrograms/0.02ml solution for injection 1.2ml pre-filled disposable devices (AstraZeneca UK Ltd)          |
|       | 06010203       |  | Canagliflozin Tablets 100 mg                                                                                       |
|       | 06010203       |  | Canagliflozin Tablets 300 mg                                                                                       |
| ftn2. | 06010203       |  | Canagliflozin 100mg tablets                                                                                        |

|       |                 |  |                                                           |
|-------|-----------------|--|-----------------------------------------------------------|
|       | 06.01.02.03.00  |  | Canagliflozin 100mg tablets                               |
| ftn4. | 06010203        |  | Canagliflozin 300mg tablets                               |
|       | 06.01.02.03.00  |  | Canagliflozin 300mg tablets                               |
|       | 06.01.02.02.00  |  | Canagliflozin 50mg / Metformin 1g tablets                 |
|       | 06.01.02.02.00  |  | Canagliflozin 50mg / Metformin 850mg tablets              |
|       | 06.01.02.01.00  |  | Chlorpropamide 100mg tablets                              |
|       | 06.01.02.01.00  |  | Chlorpropamide 250mg tablets                              |
|       | 0601021E0AAABAB |  | Chlorpropamide TABS 250MG                                 |
|       | 06010203        |  | Competact Tablets 15 mg + 850 mg                          |
| ft71. | 06010203        |  | Competact 15mg/850mg tablets (Takeda UK Ltd)              |
|       | 06.01.02.02.00  |  | Competact 15mg/850mg tablets (Takeda UK Ltd)              |
|       | 06010203        |  | Competact 15mg/850mg TABS                                 |
|       | 06.01.02.01.00  |  | Daonil 5mg tablets (Sanofi)                               |
|       | 06010203        |  | Dapagliflozin Tablets 10 mg                               |
|       | 06010203        |  | Dapagliflozin Tablets 5 mg                                |
| ft4.  | 06010203        |  | Dapagliflozin 10mg tablets                                |
|       | 06.01.02.03.00  |  | Dapagliflozin 10mg tablets                                |
|       | 06.01.02.03.00  |  | Dapagliflozin 5mg / Metformin 1g tablets                  |
|       | 06.01.02.03.00  |  | Dapagliflozin 5mg / Metformin 850mg tablets               |
| ft3.  | 06010203        |  | Dapagliflozin 5mg tablets                                 |
|       | 06.01.02.03.00  |  | Dapagliflozin 5mg tablets                                 |
|       | 06010203        |  | Dapagliflozin And Metformin Tablets 5 mg + 1000 mg        |
|       | 06.01.02.01.00  |  | Diabetamide 2.5mg tablets (Ashbourne Pharmaceuticals Ltd) |
|       | 06.01.02.01.00  |  | Diabetamide 5mg tablets (Ashbourne Pharmaceuticals Ltd)   |
|       | 06.01.02.01.00  |  | DIABINESE tablets 100mg [PFIZER]                          |
|       | 06.01.02.01.00  |  | DIABINESE tablets 250mg [PFIZER]                          |
|       | 06.01.02.02.00  |  | Diagemet XL 500mg tablets (Genus Pharmaceuticals Ltd)     |
|       | 06.01.02.01.00  |  | Diaglyk 80mg tablets (Ashbourne Pharmaceuticals Ltd)      |
|       | 0601021M0BBAAAA |  | Diamicron Tablets 80 mg                                   |
|       | 06010201        |  | Diamicron 30 mg Mr M/R tablets 30 mg                      |
| f354. | 06010201        |  | Diamicron 30mg MR tablets (Servier Laboratories Ltd)      |
|       | 06.01.02.01.00  |  | Diamicron 30mg MR tablets (Servier Laboratories Ltd)      |
|       | 06.01.02.01.00  |  | Diamicron 80mg tablets (Servier Laboratories Ltd)         |
|       | 06010201        |  | Diamicron Mr TABLETS 30MG                                 |
|       | 06010201        |  | DIAMICRON MR TABLETS 30MG                                 |
|       | 06010201        |  | Diamicron Mr TABS 30MG                                    |
|       | 0601021M0BBAAAA |  | DIAMICRON TABLETS 80MG                                    |
|       | 0601021M0BBAAAA |  | Diamicron TABS 80MG                                       |
|       | 06.01.04.00.00  |  | Diazoxide 50mg tablets                                    |

|       |                |  |                                                                                             |
|-------|----------------|--|---------------------------------------------------------------------------------------------|
|       | 06010203       |  | Dulaglutide Solution for injection 0.75 mg/0.5 ml pre-filled device                         |
|       | 06010203       |  | Dulaglutide Solution for injection 1.5 mg/0.5 ml pre-filled device                          |
| ftq2. | 06010203       |  | Dulaglutide 0.75mg/0.5ml solution for injection pre-fille...                                |
|       | 06.01.02.03.00 |  | Dulaglutide 0.75mg/0.5ml solution for injection pre-filled disposable devices               |
|       | 06.01.02.03.00 |  | Dulaglutide 1.5mg/0.5ml solution for injection pre-filled disposable devices                |
| ftq4. | 06010203       |  | Dulaglutide 1.5mg/0.5ml solution for injection pre-filled...                                |
|       | 06010203       |  | Empagliflozin Tablets 10 mg                                                                 |
|       | 06010203       |  | Empagliflozin Tablets 25 mg                                                                 |
| fto2. | 06010203       |  | Empagliflozin 10mg tablets                                                                  |
|       | 06.01.02.03.00 |  | Empagliflozin 10mg tablets                                                                  |
| fto4. | 06010203       |  | Empagliflozin 25mg tablets                                                                  |
|       | 06.01.02.03.00 |  | Empagliflozin 25mg tablets                                                                  |
|       | 06.01.02.03.00 |  | Empagliflozin 5mg / Metformin 1g tablets                                                    |
|       | 06010203       |  | Eucreas Tablets 1 gram + 50 mg                                                              |
|       | 06.01.02.02.00 |  | Eucreas 50mg/1000mg tablets (Novartis Pharmaceuticals UK Ltd)                               |
|       | 06.01.02.01.00 |  | Euglucon 2.5mg tablets (Aventis Pharma)                                                     |
|       | 06.01.02.01.00 |  | Euglucon 5mg tablets (Sanofi)                                                               |
|       | 06010203       |  | Exenatide Injection (Pre-Filled Pen) 10 micrograms/dose 60 dose pen                         |
|       | 06010203       |  | Exenatide Injection (Pre-Filled Pen) 5 micrograms/dose 60 dose pen                          |
|       | 06010203       |  | Exenatide Powder and solvent for suspension for injection 2 mg device                       |
|       | 06010203       |  | Exenatide Powder and solvent for suspension for injection 2 mg vial                         |
|       | 06010203       |  | Exenatide Prolonged release suspension for injection 2 mg device                            |
|       | 06010203       |  | Exenatide Prolonged release suspension for injection 2 mg vial                              |
| ft9y. | 06010203       |  | Exenatide 10micrograms/0.04ml solution for injection 2.4m...                                |
|       | 06.01.02.03.00 |  | Exenatide 10micrograms/0.04ml solution for injection 2.4ml pre-filled disposable devices    |
| ft95. | 06010203       |  | Exenatide 2mg powder and solvent for suspension for injec...                                |
| ft9x. | 06010203       |  | Exenatide 2mg powder and solvent for suspension for injec...                                |
|       | 06.01.02.03.00 |  | Exenatide 2mg powder and solvent for suspension for injection pre-filled disposable devices |
|       | 06.01.02.03.00 |  | Exenatide 2mg powder and solvent for suspension for injection vials                         |
|       | 06.01.02.03.00 |  | Exenatide 5micrograms/0.02ml solution for injection 1.2ml pre-filled disposable devices     |

|       |                 |  |                                                                      |
|-------|-----------------|--|----------------------------------------------------------------------|
| ft9z. | 06010203        |  | Exenatide 5micrograms/0.02ml solution for injection 1.2ml...         |
|       | 06010203        |  | Exenatide 60 Dose Prefilled Pen 1.2ml INJ 5MICROGRAMS                |
|       | 06010203        |  | EXENATIDE 60 DOSE PREFILLED PEN 1.2ML INJ 5MICROGRAMS                |
|       | 06010203        |  | Exenatide 60 Dose Prefilled Pen 2.4ml INJ 10MICROGRAMS               |
|       | 06010203        |  | EXENATIDE 60 DOSE PREFILLED PEN 2.4ML INJ 10MICROGRAMS               |
| fth2. | 06010203        |  | Forxiga 10mg tablets (AstraZeneca UK Ltd)                            |
|       | 06.01.02.03.00  |  | Forxiga 10mg tablets (AstraZeneca UK Ltd)                            |
|       | 06.01.02.03.00  |  | Forxiga 5mg tablets (AstraZeneca UK Ltd)                             |
|       | 06.01.02.03.00  |  | Galvus 50mg tablets (Novartis Pharmaceuticals UK Ltd)                |
|       | 06010203        |  | GALVUS TABLETS 50MG                                                  |
|       | 0601021H0AAAAAA |  | Glibenclamide Tablets 2.5 mg                                         |
|       | 0601021H0AAABAB |  | Glibenclamide Tablets 5 mg                                           |
|       | 06.01.02.01.00  |  | Glibenclamide 2.5mg tablets                                          |
| f332. | 06010201        |  | Glibenclamide 5mg tablets                                            |
|       | 06.01.02.01.00  |  | Glibenclamide 5mg tablets                                            |
|       | 0601021H0AAAAAA |  | GLIBENCLAMIDE TABLETS 2.5MG                                          |
|       | 0601021H0AAABAB |  | GLIBENCLAMIDE TABLETS 5MG                                            |
|       | 0601021H0AAAAAA |  | Glibenclamide TABS 2.5MG                                             |
|       | 0601021H0AAABAB |  | Glibenclamide TABS 5MG                                               |
|       | 0601021H0AAABAB |  | GLIBENCLAMIDE-P42 5MG TABLET                                         |
|       | 06.01.02.01.00  |  | Glibenese 5mg tablets (Pfizer Ltd)                                   |
|       | 06010201        |  | Gliclazide M/R tablets 30 mg                                         |
|       | 06010201        |  | Gliclazide M/R Tablets 30 mg                                         |
|       | 06010201        |  | Gliclazide Tablets 40 mg                                             |
|       | 0601021M0AAAAAA |  | Gliclazide Tablets 80 mg                                             |
| f35y. | 06010201        |  | Gliclazide 30mg modified-release tablets                             |
|       | 06.01.02.01.00  |  | Gliclazide 30mg modified-release tablets                             |
|       | 06.01.02.01.00  |  | Gliclazide 30mg modified-release tablets (A A H Pharmaceuticals Ltd) |
|       | 06.01.02.01.00  |  | Gliclazide 30mg modified-release tablets (Actavis UK Ltd)            |
| f35x. | 06010201        |  | Gliclazide 40mg tablets                                              |
|       | 06.01.02.01.00  |  | Gliclazide 40mg tablets                                              |
|       | 06.01.02.01.00  |  | Gliclazide 40mg/5ml oral suspension                                  |
| f35w. | 06010201        |  | Gliclazide 60mg modified-release tablets                             |
|       | 06.01.02.01.00  |  | Gliclazide 60mg modified-release tablets                             |
| f35z. | 06010201        |  | Gliclazide 80mg tablets                                              |
|       | 06.01.02.01.00  |  | Gliclazide 80mg tablets                                              |
|       | 06.01.02.01.00  |  | Gliclazide 80mg tablets (A A H Pharmaceuticals Ltd)                  |
|       | 06.01.02.01.00  |  | Gliclazide 80mg tablets (Actavis UK Ltd)                             |

|       |                 |  |                                                     |
|-------|-----------------|--|-----------------------------------------------------|
|       | 06.01.02.01.00  |  | Gliclazide 80mg tablets (Almus Pharmaceuticals Ltd) |
|       | 06.01.02.01.00  |  | Gliclazide 80mg tablets (Mylan Ltd)                 |
|       | 06.01.02.01.00  |  | Gliclazide 80mg tablets (PLIVA Pharma Ltd)          |
|       | 06.01.02.01.00  |  | Gliclazide 80mg tablets (Sandoz Ltd)                |
|       | 06.01.02.01.00  |  | Gliclazide 80mg tablets (Teva UK Ltd)               |
|       | 0601021M0AAAAAA |  | GLICLAZIDE 80MG TABLETS-P42 0                       |
|       | 06.01.02.01.00  |  | Gliclazide 80mg/5ml oral suspension                 |
|       | 06010201        |  | GLICLAZIDE MR TABLETS 30MG                          |
|       | 06010201        |  | Gliclazide Mr TABS 30MG                             |
|       | 0601021M0AAAAAA |  | Gliclazide TABLETS 80MG                             |
|       | 0601021M0AAAAAA |  | GLICLAZIDE TABLETS 80MG                             |
|       | 0601021M0AAAAAA |  | GLICLAZIDE TABLETS 80MG-P42 0                       |
| f35z. | 06010201        |  | GLICLAZIDE tabs 80mg                                |
|       | 0601021M0AAAAAA |  | Gliclazide TABS 80MG                                |
|       | 0601021A0AAABAB |  | Glimepiride Tablets 1 mg                            |
|       | 0601021A0AAAAAA |  | Glimepiride Tablets 2 mg                            |
|       | 0601021A0AADAD  |  | Glimepiride Tablets 4 mg                            |
| f3A3. | 06010201        |  | Glimepiride 1mg tablets                             |
|       | 06.01.02.01.00  |  | Glimepiride 1mg tablets                             |
|       | 06.01.02.01.00  |  | Glimepiride 1mg tablets (A A H Pharmaceuticals Ltd) |
| f3A1. | 06010201        |  | Glimepiride 2mg tablets                             |
|       | 06.01.02.01.00  |  | Glimepiride 2mg tablets                             |
|       | 06.01.02.01.00  |  | Glimepiride 2mg tablets (A A H Pharmaceuticals Ltd) |
|       | 06.01.02.01.00  |  | Glimepiride 2mg tablets (Teva UK Ltd)               |
|       | 06.01.02.01.00  |  | Glimepiride 2mg tablets (Zentiva)                   |
|       | 06.01.02.01.00  |  | Glimepiride 3mg tablets                             |
| f3A5. | 06010201        |  | Glimepiride 4mg tablets                             |
|       | 06.01.02.01.00  |  | Glimepiride 4mg tablets                             |
|       | 0601021A0AAACAC |  | GLIMEPIRIDE TABLETS 3MG                             |
|       | 0601021A0AADAD  |  | GLIMEPIRIDE TABLETS 4MG                             |
|       | 0601021P0AAABAB |  | Glipizide Tablets 5 mg                              |
|       | 06.01.02.01.00  |  | Glipizide 2.5mg tablets                             |
| f361. | 06010201        |  | Glipizide 5mg tablets                               |
|       | 06.01.02.01.00  |  | Glipizide 5mg tablets                               |
|       | 06.01.02.01.00  |  | Glipizide 5mg tablets (Actavis UK Ltd)              |
|       | 0601021P0AAAAAA |  | GLIPIZIDE TABLETS 2.5MG                             |
|       | 0601021P0AAABAB |  | Glipizide TABLETS 5MG                               |
|       | 0601021P0AAABAB |  | GLIPIZIDE TABLETS 5MG                               |
|       | 0601021P0AAAAAA |  | Glipizide TABS 2.5MG                                |
| f361. | 06010201        |  | GLIPIZIDE tabs 5mg                                  |
|       | 0601021P0AAABAB |  | Glipizide TABS 5MG                                  |



|       |                 |  |                                                                                   |
|-------|-----------------|--|-----------------------------------------------------------------------------------|
|       | 06.01.02.03.00  |  | Glucobay 100mg tablets (Bayer Plc)                                                |
|       | 06.01.02.03.00  |  | Glucobay 50mg tablets (Bayer Plc)                                                 |
|       | 0601023A0BBACAA |  | Glucobay TABS 50MG                                                                |
|       | 0601022B0BBAAAB |  | Glucophage Tablets 500 mg                                                         |
|       | 06.01.02.02.00  |  | Glucophage 1000mg oral powder sachets (Merck Serono Ltd)                          |
|       | 06.01.02.02.00  |  | Glucophage 500mg oral powder sachets (Merck Serono Ltd)                           |
| f411. | 06010202        |  | Glucophage 500mg tablets (Merck Serono Ltd)                                       |
|       | 06.01.02.02.00  |  | Glucophage 500mg tablets (Merck Serono Ltd)                                       |
|       | 06.01.02.02.00  |  | Glucophage 850mg tablets (Merck Serono Ltd)                                       |
|       | 06010202        |  | Glucophage Sr M/R tablets 1 gram                                                  |
|       | 06010202        |  | Glucophage Sr M/R tablets 500 mg                                                  |
|       | 06010202        |  | Glucophage Sr M/R tablets 750 mg                                                  |
| f41A. | 06010202        |  | Glucophage SR 1000mg tablets (Merck Serono Ltd)                                   |
|       | 06.01.02.02.00  |  | Glucophage SR 1000mg tablets (Merck Serono Ltd)                                   |
| f417. | 06010202        |  | Glucophage SR 500mg tablets (Merck Serono Ltd)                                    |
|       | 06.01.02.02.00  |  | Glucophage SR 500mg tablets (Merck Serono Ltd)                                    |
| f419. | 06010202        |  | Glucophage SR 750mg tablets (Merck Serono Ltd)                                    |
|       | 06.01.02.02.00  |  | Glucophage SR 750mg tablets (Merck Serono Ltd)                                    |
|       | 06010202        |  | GLUCOPHAGE SR TABLETS 500MG                                                       |
|       | 06010202        |  | Glucophage Sr TABS 1G                                                             |
|       | 06010202        |  | Glucophage Sr TABS 500MG                                                          |
|       | 06010202        |  | Glucophage SR TABS 500mg                                                          |
|       | 06010202        |  | glucophage SR TABS 500MGS                                                         |
|       | 0601022B0BBAAAB |  | GLUCOPHAGE TABLETS 500MG                                                          |
|       | 0601022B0BBAAAB |  | Glucophage TABS 500MG                                                             |
|       | 0601060D0BLAAA0 |  | Glucotide Test strips                                                             |
|       | 0601060D0BLAAA0 |  | Glucotide Strip Blood Glucose Testing 50                                          |
|       | 06.01.01.02.00  |  | HUMAJECT I pen 100 units/ml [LILLY]                                               |
|       | 06.01.01.02.00  |  | Humaject M3 Pen 100units/ml suspension for injection (Eli Lilly and Company Ltd)  |
|       | 06.01.01.01.00  |  | Humaject S Pen 100units/ml solution for injection (Eli Lilly and Company Ltd)     |
|       | 0601011L0BBAAAA |  | Humalog Cartridges (1.5 MI) 100 units/ml                                          |
|       | 06010101        |  | Humalog Cartridges (3 MI) 100 units/ml                                            |
|       | 0601011L0BBABAB |  | Humalog Injection 100 units/ml                                                    |
|       | 06010101        |  | Humalog Solution for injection 100 units/ml 3 ml pre-filled pen                   |
| f132. | 06010101        |  | Humalog 100units/ml solution for injection 10ml vials (Eli Lilly and Company Ltd) |
|       | 06.01.01.01.00  |  | Humalog 100units/ml solution for injection 10ml vials (Eli Lilly and Company Ltd) |

|       |                 |  |                                                                                                           |
|-------|-----------------|--|-----------------------------------------------------------------------------------------------------------|
|       | 06.01.01.01.00  |  | Humalog 100units/ml solution for injection 3ml cartridges (Eli Lilly and Company Ltd)                     |
| f135. | 06010101        |  | Humalog 100units/ml solution for injection 3ml cartridges...                                              |
|       | 060101110BBAAAA |  | Humalog Cartridge 1.5ml INJ 100UNITS/ML                                                                   |
|       | 06010101        |  | Humalog Cartridge 3ml INJ 100UNITS/ML                                                                     |
|       | 06010101        |  | HUMALOG CARTRIDGE 3ML INJ 100UNITS/ML                                                                     |
| f135. | 06010101        |  | HUMALOG CARTRIDGE inj soln 100 units/ml                                                                   |
|       | 06.01.01.01.00  |  | HUMALOG injection 100 units/ml [LILLY]                                                                    |
|       | 06010101        |  | Humalog Kwikpen Solution for injection 100 units/ml 3 ml pre-filled pen                                   |
| f138. | 06010101        |  | Humalog KwikPen 100units/ml solution for injection 3ml pr...                                              |
|       | 06.01.01.01.00  |  | Humalog KwikPen 100units/ml solution for injection 3ml pre-filled pen (Eli Lilly and Company Ltd)         |
|       | 06010101        |  | Humalog Kwikpen 3ml INJ 100UNITS/ML                                                                       |
|       | 06010102        |  | Humalog Mix 25 Cartridge 3ml INJ 100UNITS/ML                                                              |
|       | 06010102        |  | HUMALOG MIX 25 CARTRIDGE 3ML INJ 100UNITS/ML                                                              |
|       | 06.01.01.02.00  |  | HUMALOG MIX 25 injection 25:75; 100 units/ml [LILLY]                                                      |
|       | 06010102        |  | HUMALOG MIX 25 KWICKPEN 3ML INJ 100UNITS/ML                                                               |
|       | 06010102        |  | HUMALOG MIX 25 PEN 3ML INJ 100UNITS/ML                                                                    |
|       | 06010102        |  | HUMALOG MIX 50 PREFILLED PEN 3ML INJ 100UNITS/ML                                                          |
|       | 06010102        |  | Humalog Mix25 Cartridges (3 ML) 100 units/ml                                                              |
|       | 06010102        |  | Humalog Mix25 Suspension For Injection 100 units/ml 3 ml pre-filled pen                                   |
|       | 06.01.01.02.00  |  | Humalog Mix25 100units/ml suspension for injection 10ml vials (Eli Lilly and Company Ltd)                 |
| fw11. | 06010102        |  | Humalog Mix25 100units/ml suspension for injection 3ml ca...                                              |
|       | 06.01.01.02.00  |  | Humalog Mix25 100units/ml suspension for injection 3ml cartridges (Eli Lilly and Company Ltd)             |
|       | 06010102        |  | Humalog Mix25 Kwikpen Suspension For Injection 100 units/ml 3 ml pre-filled pen                           |
| fw15. | 06010102        |  | Humalog Mix25 KwikPen 100units/ml suspension for injectio...                                              |
|       | 06.01.01.02.00  |  | Humalog Mix25 KwikPen 100units/ml suspension for injection 3ml pre-filled pen (Eli Lilly and Company Ltd) |
|       | 06.01.01.02.00  |  | Humalog Mix25 Pen 100units/ml suspension for injection 3ml pre-filled pen (Eli Lilly and Company Ltd)     |
|       | 06010102        |  | Humalog Mix50 Injection (cartridges) 100 units/ml 3 ml cartridge                                          |
|       | 06010102        |  | Humalog Mix50 Suspension For Injection 100 units/ml 3 ml pre-filled pen                                   |
| fw14. | 06010102        |  | Humalog Mix50 100units/ml suspension for injection 3ml ca...                                              |
|       | 06.01.01.02.00  |  | Humalog Mix50 100units/ml suspension for injection 3ml cartridges (Eli Lilly and Company Ltd)             |

|       |                  |  |                                                                                                           |
|-------|------------------|--|-----------------------------------------------------------------------------------------------------------|
|       | 06010102         |  | Humalog Mix50 Kwikpen Suspension For Injection 100 units/ml 3 ml pre-filled pen                           |
| fw16. | 06010102         |  | Humalog Mix50 KwikPen 100units/ml suspension for injectio...                                              |
|       | 06.01.01.02.00   |  | Humalog Mix50 KwikPen 100units/ml suspension for injection 3ml pre-filled pen (Eli Lilly and Company Ltd) |
|       | 06.01.01.02.00   |  | Humalog Mix50 Pen 100units/ml suspension for injection 3ml pre-filled pen (Eli Lilly and Company Ltd)     |
|       | 06.01.01.01.00   |  | Humalog Pen 100units/ml solution for injection 3ml pre-filled pen (Eli Lilly and Company Ltd)             |
|       | 06.01.01.02.00   |  | HUMAN ACTRAPHANE injection 100 units/ml [NOVO]                                                            |
|       | 0601011N0BF AEAL |  | Human Actrapid Injection 100 units/ml                                                                     |
|       | 0601011N0BF APAM |  | Human Actrapid Preloaded Pen 100 units/ml                                                                 |
|       | 06010101         |  | HUMAN ACTRAPID 3ML PENFIL CARTRIDGES                                                                      |
|       | 0601011N0BF AJAD |  | Human Actrapid Penfill Cartridges (1.5 MI) 100 units/ml                                                   |
|       | 0601011N0BF AQAS |  | Human Actrapid Penfill Cartridges (3 MI) 100 units/ml                                                     |
|       | 0601011N0BF AJAD |  | Human Actrapid Penfill 1.5ml INJ 100UNITS/ML                                                              |
|       | 06.01.01.01.00   |  | Human Actrapid Penfill 100units/ml solution for injection 1.5ml cartridges (Novo Nordisk Ltd)             |
|       | 06010101         |  | human actrapid penfill 3ml INJ 100 units/ml                                                               |
|       | 06010101         |  | Human Actrapid Penfill 3ml inj 100 units/ml                                                               |
|       | 06010101         |  | Human Actrapid Penfill 3ml INJ 100UNITS/ML                                                                |
|       | 06010101         |  | HUMAN ACTRAPID PENFILL 3ML INJ 100UNITS/ML                                                                |
|       | 06.01.01.02.00   |  | HUMAN INITARD 50/50 injection 100 units/ml [NOVO]                                                         |
|       | 06010102         |  | HUMAN INSULATARD 3ML PENFIL CARTRIDGES                                                                    |
|       | 06010102         |  | Human Insulatard Ge Penfill Cartridges (1.5 MI) 100 units/ml                                              |
|       | 0601012S0BDALAK  |  | Human Insulatard Ge Penfill cartridges (3 ml) 100 units/ml                                                |
|       | 0601012S0BDALAK  |  | Human Insulatard Ge Penfill Cartridges (3 MI) 100 units/ml                                                |
|       | 0601012S0AAAH AH |  | Human Insulatard Ge Preloaded Pen 100 units/ml                                                            |
|       | 0601012S0BD AJAC |  | HUMAN INSULATARD GE VIAL 10ML INJ 100UNITS/ML                                                             |
|       | 06010102         |  | Human Insulatard Penfill 1.5ml INJ 100UNITS/ML                                                            |
|       | 06010102         |  | Human Insulatard Penfill 3ml INJ 100UNITS/ML                                                              |
|       | 06010102         |  | HUMAN INSULATARD PENFILL 3ML INJ 100UNITS/ML                                                              |
|       | 0601012D0BCAZA0  |  | Human Mixtard 20 Penfill cartridges (3 ml)                                                                |
|       | 06010102         |  | HUMAN MIXTARD 20 PEN 3ML INJ 100UNITS/ML                                                                  |
|       | 0601012D0BCAZA0  |  | HUMAN MIXTARD 20 PEN 3ML INJ 100UNITS/ML                                                                  |
|       | 0601012D0BCAZA0  |  | HUMAN MIXTARD 20 PENFILL 3ML CARTRIDGE                                                                    |
|       | 06010102         |  | Human Mixtard 20 Penfill 3ml INJ 100UNITS/ML                                                              |
|       | 06010102         |  | HUMAN MIXTARD 20 PENFILL 3ML INJ 100UNITS/ML                                                              |
|       | 06010102         |  | Human Mixtard 30 Penfill Cartridges (1.5 MI)                                                              |
|       | 0601012D0BCARA5  |  | Human Mixtard 30 Preloaded pen                                                                            |
|       | 06010102         |  | HUMAN MIXTARD 30 100U/ML PENFILL 3ML                                                                      |

|  |                 |  |                                                                                                                                                    |
|--|-----------------|--|----------------------------------------------------------------------------------------------------------------------------------------------------|
|  | 0601012D0BCAWAQ |  | Human Mixtard 30 Ge Injection                                                                                                                      |
|  | 06010102        |  | Human Mixtard 30 Ge Vial 10ml INJ 100UNITS/ML                                                                                                      |
|  | 06010102        |  | human mixtard 30 innolet                                                                                                                           |
|  | 06010102        |  | HUMAN MIXTARD 30 INNOLET PREFILLED DEVICE 3ML INJ 100UNITS/ML                                                                                      |
|  | 0601012D0BCARA5 |  | HUMAN MIXTARD 30 PEN                                                                                                                               |
|  | 06010102        |  | Human Mixtard 30 Pen 3ml INJ 100UNITS/ML                                                                                                           |
|  | 06010102        |  | HUMAN MIXTARD 30 PEN 3ML INJ 100UNITS/ML                                                                                                           |
|  | 0601012D0BCARA5 |  | HUMAN MIXTARD 30 PEN 3ML INJ 100UNITS/ML                                                                                                           |
|  | 0601012D0BCARA5 |  | HUMAN MIXTARD 30 PEN 5 X 3ML                                                                                                                       |
|  | 06010102        |  | Human Mixtard 30 Penfill 3ml INJ 100UNITS/ML                                                                                                       |
|  | 06010102        |  | HUMAN MIXTARD 30 PENFILL 3ML INJ 100UNITS/ML                                                                                                       |
|  | 0601012D0BCBAA0 |  | HUMAN MIXTARD 30 PENFILL 3ML INJ 100UNITS/ML                                                                                                       |
|  | 0601012D0BCUA0  |  | Human Mixtard 40 Preloaded pen                                                                                                                     |
|  | 06010102        |  | Human Mixtard 40 Penfill 3ml INJ 100UNITS/ML                                                                                                       |
|  | 06.01.01.02.00  |  | Human Mixtard 50 100units/ml suspension for injection 10ml vials (Novo Nordisk Ltd)                                                                |
|  | 06010102        |  | Human Mixtard 50 Pen 3ml INJ 100UNITS/ML                                                                                                           |
|  | 06010102        |  | Human Mixtard 50 Penfill 3ml INJ 100UNITS/ML                                                                                                       |
|  | 0601012G0BDABAE |  | Human Monotard (Novo) Injection 100 units/ml                                                                                                       |
|  | 06010102        |  | Human Monotard Vial 10ml INJ 100UNITS/ML                                                                                                           |
|  | 06010102        |  | HUMAN MONOTARD VIAL 10ML INJ 100UNITS/ML                                                                                                           |
|  | 06.01.01.02.00  |  | HUMAN PROTAPHANE injection 100 units/ml [NOVO]                                                                                                     |
|  | 06.01.01.02.00  |  | HUMAN PROTAPHANE PENFILL 100 units/ml [NOVO]                                                                                                       |
|  | 0601011N0BFACAB |  | Human Velosulin Injection 100 u/ml                                                                                                                 |
|  | 06010101        |  | Human Velosulin Vial 10ml INJ 100UNITS/ML                                                                                                          |
|  | 06.01.01.04.00  |  | HumaPen Ergo hypodermic insulin injection pen reusable for 3ml cartridge 1 unit dial up / range 1-60 units Burgundy (Eli Lilly and Company Ltd)    |
|  | 06.01.01.04.00  |  | HumaPen Luxura HD hypodermic insulin injection pen reusable for 3ml cartridge 0.5 unit dial up / range 1-30 units (Eli Lilly and Company Ltd)      |
|  | 06.01.01.03.00  |  | HumaPen Luxura hypodermic insulin injection pen reusable for 3ml cartridge 1 unit dial up / range 1-60 units Champagne (Eli Lilly and Company Ltd) |
|  | 06010103        |  | Humapen Savvio Re-usable pen 3 ml 1-60 units Blue                                                                                                  |
|  | 06010103        |  | Humapen Savvio Re-usable pen 3 ml 1-60 units Graphite                                                                                              |
|  | 06010103        |  | Humapen Savvio Re-usable pen 3 ml 1-60 units Green                                                                                                 |
|  | 06010103        |  | Humapen Savvio Re-usable pen 3 ml 1-60 units Pink                                                                                                  |
|  | 06010103        |  | Humapen Savvio Re-usable pen 3 ml 1-60 units Red                                                                                                   |
|  | 06010103        |  | Humapen Savvio Re-usable pen 3 ml 1-60 units Silver                                                                                                |
|  | 06.01.01.03.00  |  | HumaPen Savvio hypodermic insulin injection pen reusable for 3ml cartridge 1 unit dial up / range 1-60 units Pink (Eli Lilly and Company Ltd)      |

|       |                 |  |                                                                                                                                              |
|-------|-----------------|--|----------------------------------------------------------------------------------------------------------------------------------------------|
|       | 06.01.01.04.00  |  | HumaPen Savvio hypodermic insulin injection pen reusable for 3ml cartridge 1 unit dial up / range 1-60 units Red (Eli Lilly and Company Ltd) |
|       | 0601012S0BGABAF |  | Humulin I Cartridges (1.5 MI) 100 units/ml                                                                                                   |
|       | 0601012S0BGADAL |  | Humulin I Cartridges (3 MI) 100 units/ml                                                                                                     |
|       | 0601012S0BGAAAE |  | Humulin I Injection 100 units/ml                                                                                                             |
|       | 06.01.01.02.00  |  | Humulin I 100units/ml suspension for injection 10ml vials (Eli Lilly and Company Ltd)                                                        |
| f25a. | 06010102        |  | Humulin I 100units/ml suspension for injection 10ml vials...                                                                                 |
| f25o. | 06010102        |  | Humulin I 100units/ml suspension for injection 3ml cartri...                                                                                 |
|       | 06.01.01.02.00  |  | Humulin I 100units/ml suspension for injection 3ml cartridges (Eli Lilly and Company Ltd)                                                    |
|       | 0601012S0BGABAF |  | Humulin I Cartridge 1.5ml INJ 100UNITS/ML                                                                                                    |
|       | 0601012S0BGABAF |  | HUMULIN I CARTRIDGE 1.5ML INJ 100UNITS/ML                                                                                                    |
|       | 0601012S0BGADAL |  | Humulin I Cartridge 3ml INJ 100UNITS/ML                                                                                                      |
|       | 0601012S0BGADAL |  | HUMULIN I CARTRIDGE 3ML INJ 100UNITS/ML                                                                                                      |
|       | 06.01.01.02.00  |  | HUMULIN I injection 100 units/ml [LILLY]                                                                                                     |
|       | 06010102        |  | Humulin I Kwikpen Suspension For Injection 100 units/ml 3 ml pre-filled pen                                                                  |
| f25G. | 06010102        |  | Humulin I KwikPen 100units/ml suspension for injection 3m...                                                                                 |
|       | 06.01.01.02.00  |  | Humulin I KwikPen 100units/ml suspension for injection 3ml pre-filled pen (Eli Lilly and Company Ltd)                                        |
|       | 06.01.01.02.00  |  | Humulin I Pen 100units/ml suspension for injection 3ml pre-filled pen (Eli Lilly and Company Ltd)                                            |
|       | 06010102        |  | Humulin I Prefilled Pen 3ml INJ 100UNITS/ML                                                                                                  |
|       | 0601012S0BGAAAE |  | HUMULIN I VIAL 10ML INJ 100UNITS/ML                                                                                                          |
|       | 0601012D0BBAQAY |  | Humulin M1 Cartridges (3 MI)                                                                                                                 |
|       | 06.01.01.02.00  |  | HUMULIN M1 injection 100 units/ml [LILLY]                                                                                                    |
|       | 0601012D0BBARAZ |  | Humulin M2 Cartridges (3 MI)                                                                                                                 |
|       | 06.01.01.02.00  |  | Humulin M2 100units/ml suspension for injection 3ml cartridges (Eli Lilly and Company Ltd)                                                   |
|       | 0601012D0BBAFAL |  | HUMULIN M2 CARTRIDGE 1.5ML INJ 100UNITS/ML                                                                                                   |
|       | 0601012D0BBARAZ |  | Humulin M2 Cartridge 3ml INJ 100UNITS/ML                                                                                                     |
|       | 0601012D0BBARAZ |  | HUMULIN M2 CARTRIDGE 3ML INJ 100UNITS/ML                                                                                                     |
|       | 0601012D0BBABAF |  | Humulin M2 Vial 10ml INJ 100UNITS/ML                                                                                                         |
|       | 0601012D0BBASBA |  | Humulin M3 Cartridges (3 MI)                                                                                                                 |
|       | 0601012D0BBACAG |  | Humulin M3 Suspension For Injection 100 units/ml 10 ml vial                                                                                  |
|       | 0601012D0BBASBA |  | Humulin M3 Suspension For Injection 100 units/ml 3 ml cartridge                                                                              |
|       | 06010102        |  | Humulin M3 Suspension For Injection 100 units/ml 3 ml pre-filled pen                                                                         |
| f27d. | 06010151        |  | Humulin M3 100units/ml suspension for injection 10ml vial...                                                                                 |

|       |                 |  |                                                                                                        |
|-------|-----------------|--|--------------------------------------------------------------------------------------------------------|
|       | 06.01.01.02.00  |  | Humulin M3 100units/ml suspension for injection 10ml vials (Eli Lilly and Company Ltd)                 |
| f27z. | 06010102        |  | Humulin M3 100units/ml suspension for injection 3ml cartr...                                           |
| f27z. | 06010151        |  | Humulin M3 100units/ml suspension for injection 3ml cartr...                                           |
|       | 06.01.01.02.00  |  | Humulin M3 100units/ml suspension for injection 3ml cartridges (Eli Lilly and Company Ltd)             |
|       | 0601012D0BBASBA |  | Humulin M3 Cartridge 3ml INJ 100UNITS/ML                                                               |
|       | 0601012D0BBASBA |  | HUMULIN M3 CARTRIDGE 3ML INJ 100UNITS/ML                                                               |
|       | 06.01.01.02.00  |  | HUMULIN M3 injection 100 units/ml [LILLY]                                                              |
|       | 06010102        |  | Humulin M3 Kwikpen Suspension For Injection 100 units/ml 3 ml pre-filled pen                           |
| f28E. | 06010151        |  | Humulin M3 KwikPen 100units/ml suspension for injection 3...                                           |
|       | 06.01.01.02.00  |  | Humulin M3 KwikPen 100units/ml suspension for injection 3ml pre-filled pen (Eli Lilly and Company Ltd) |
|       | 06.01.01.02.00  |  | Humulin M3 Pen 100units/ml suspension for injection 3ml pre-filled pen (Eli Lilly and Company Ltd)     |
|       | 06010102        |  | Humulin M3 Prefilled Pen 3ml INJ 100UNITS/ML                                                           |
|       | 06010102        |  | HUMULIN M3 PREFILLED PEN 3ML INJ 100UNITS/ML                                                           |
|       | 0601012D0BBACAG |  | Humulin M3 Vial 10ml INJ 100UNITS/ML                                                                   |
|       | 0601012D0BBADAH |  | Humulin M4 Vial 10ml INJ 100UNITS/ML                                                                   |
|       | 06.01.01.02.00  |  | Humulin M5 100units/ml suspension for injection 10ml vials (Eli Lilly and Company Ltd)                 |
|       | 0601011N0BHABAI |  | Humulin S Cartridges (1.5 MI) 100 units/ml                                                             |
|       | 0601011N0BHADAP |  | Humulin S Cartridges (3 MI) 100 units/ml                                                               |
|       | 0601011N0BHAAAG |  | Humulin S Injection 100 units/ml                                                                       |
|       | 06.01.01.01.00  |  | Humulin S 100units/ml solution for injection 10ml vials (Eli Lilly and Company Ltd)                    |
| f12s. | 06010101        |  | Humulin S 100units/ml solution for injection 3ml cartridg...                                           |
|       | 06.01.01.01.00  |  | Humulin S 100units/ml solution for injection 3ml cartridges (Eli Lilly and Company Ltd)                |
|       | 0601011N0BHABAI |  | Humulin S Cartridge 1.5ml INJ 100UNITS/ML                                                              |
|       | 0601011N0BHADAP |  | Humulin S Cartridge 3ml INJ 100UNITS/ML                                                                |
|       | 0601011N0BHADAP |  | HUMULIN S CARTRIDGE 3ML INJ 100UNITS/ML                                                                |
|       | 06.01.01.01.00  |  | HUMULIN S injection 100 units/ml [LILLY]                                                               |
|       | 0601011N0BHAAAG |  | HUMULIN S VIAL 10ML INJ 100UNITS/ML                                                                    |
|       | 06.01.01.02.00  |  | Humulin Zn 100units/ml suspension for injection 10ml vials (Eli Lilly and Company Ltd)                 |
| f25v. | 06010102        |  | Hypurin Bovine Isophane 100units/ml suspension for inject...                                           |
|       | 06.01.01.02.00  |  | Hypurin Bovine Isophane 100units/ml suspension for injection 10ml vials (Wockhardt UK Ltd)             |
|       | 06.01.01.02.00  |  | HYPURIN BOVINE ISOPHANE injection 100 units/ml [CP PHARM]                                              |

|       |                |  |                                                                                                                                |
|-------|----------------|--|--------------------------------------------------------------------------------------------------------------------------------|
|       | 06.01.01.02.00 |  | Hypurin Bovine Lente 100units/ml suspension for injection 10ml vials (Wockhardt UK Ltd)                                        |
|       | 06.01.03.00.00 |  | Hypurin Bovine Neutral 100units/ml solution for injection 10ml vials (Wockhardt UK Ltd)                                        |
| f12H. | 06010101       |  | Hypurin Bovine Neutral 100units/ml solution for injection...                                                                   |
|       | 06.01.01.01.00 |  | HYPURIN BOVINE NEUTRAL injection 100 units/ml [CP PHARM]                                                                       |
|       | 06.01.01.02.00 |  | Hypurin Bovine Protamine Zinc 100units/ml suspension for injection 10ml vials (Wockhardt UK Ltd)                               |
|       | 06.01.01.02.00 |  | Hypurin Porcine 30/70 Mix 100units/ml suspension for injection 10ml vials (Wockhardt UK Ltd)                                   |
|       | 06.01.01.02.00 |  | Hypurin Porcine 30/70 Mix 100units/ml suspension for injection 3ml cartridges (Wockhardt UK Ltd)                               |
|       | 06010102       |  | Hypurin Porcine 30/70 Mix Cartridge 3ml INJ 100UNITS/ML                                                                        |
| f25w. | 06010102       |  | Hypurin Porcine Isophane 100units/ml suspension for injec...                                                                   |
|       | 06.01.01.02.00 |  | Hypurin Porcine Isophane 100units/ml suspension for injection 10ml vials (Wockhardt UK Ltd)                                    |
|       | 06.01.01.02.00 |  | Hypurin Porcine Isophane 100units/ml suspension for injection 3ml cartridges (Wockhardt UK Ltd)                                |
|       | 06010102       |  | Hypurin Porcine Isophane Cartridge 3ml INJ 100UNITS/ML                                                                         |
|       | 06.01.01.02.00 |  | HYPURIN PORCINE ISOPHANE injection 100 units/ml [WOCKHARDT]                                                                    |
| f12I. | 06010101       |  | Hypurin Porcine Neutral 100units/ml solution for injectio...                                                                   |
|       | 06.01.03.00.00 |  | Hypurin Porcine Neutral 100units/ml solution for injection 10ml vials (Wockhardt UK Ltd)                                       |
|       | 06.01.03.00.00 |  | Hypurin Porcine Neutral 100units/ml solution for injection 3ml cartridges (Wockhardt UK Ltd)                                   |
|       | 06010101       |  | Hypurin Porcine Neutral Cartridge 3ml INJ 100UNITS/ML                                                                          |
|       | 06.01.01.01.00 |  | HYPURIN PORCINE NEUTRAL injection 100 units/ml [CP PHARM]                                                                      |
|       | 06.01.01.03.00 |  | Innovo hypodermic insulin injection pen reusable for 3ml cartridge 1 unit dial up / range 1-70 units Green (Novo Nordisk Ltd)  |
|       | 06.01.01.04.00 |  | Innovo hypodermic insulin injection pen reusable for 3ml cartridge 1 unit dial up / range 1-70 units Orange (Novo Nordisk Ltd) |
|       | 06.01.01.04.00 |  | Insulet needle free starter kit [EU PHAR BV]                                                                                   |
|       | 06010102       |  | Insulatard Injection 100 units/ml 10 ml vial                                                                                   |
| f25p. | 06010102       |  | Insulatard 100units/ml suspension for injection 10ml vial...                                                                   |
|       | 06.01.01.02.00 |  | Insulatard 100units/ml suspension for injection 10ml vials (Novo Nordisk Ltd)                                                  |
|       | 06.01.01.02.00 |  | Insulatard FlexPen 100units/ml suspension for injection (Novo Nordisk Ltd)                                                     |
|       | 06010102       |  | Insulatard Flexpen Prefilled Pen 3ml INJ 100UNITS/ML                                                                           |
|       | 06.01.01.02.00 |  | INSULATARD ge injection 100 units/ml [NOVO]                                                                                    |

|       |                |  |                                                                                                      |
|-------|----------------|--|------------------------------------------------------------------------------------------------------|
|       | 06010102       |  | INSULATARD HUMAN (INSULIN) 3ML CARTRIDGE                                                             |
|       | 06.01.01.02.00 |  | INSULATARD injection 100 units/ml [NOVO]                                                             |
|       | 06010102       |  | Insulatard Innolet Suspension For Injection 100 units/ml 3 ml pre-filled pen                         |
| f25c. | 06010102       |  | Insulatard InnoLet 100units/ml suspension for injection 3...                                         |
|       | 06.01.01.02.00 |  | Insulatard InnoLet 100units/ml suspension for injection 3ml pre-filled pen (Novo Nordisk Ltd)        |
|       | 06.01.01.02.00 |  | INSULATARD INNOLET injection 100 units/ml [NOVO]                                                     |
|       | 06.01.01.02.00 |  | Insulatard NovoLet 100units/ml suspension for injection (Novo Nordisk Ltd)                           |
|       | 06010102       |  | Insulatard Penfill Injection 100 units/ml 3 ml cartridge                                             |
|       | 06.01.01.02.00 |  | INSULATARD PENFILL 100 units/ml [NOVO]                                                               |
| f25x. | 06010102       |  | Insulatard Penfill 100units/ml suspension for injection 3...                                         |
|       | 06.01.01.02.00 |  | Insulatard Penfill 100units/ml suspension for injection 3ml cartridges (Novo Nordisk Ltd)            |
|       | 06010102       |  | Insulatard Penfill 3ml INJ 100UNITS/ML                                                               |
|       | 06.01.01.01.00 |  | Insulin aspart 100units/ml solution for injection 10ml vials                                         |
|       | 06.01.01.01.00 |  | Insulin aspart 100units/ml solution for injection 3ml cartridges                                     |
|       | 06.01.01.01.00 |  | Insulin aspart 100units/ml solution for injection 3ml pre-filled disposable devices                  |
|       | 06.01.01.02.00 |  | Insulin aspart biphasic 30/70 100units/ml suspension for injection 3ml cartridges                    |
|       | 06.01.01.02.00 |  | Insulin aspart biphasic 30/70 100units/ml suspension for injection 3ml pre-filled disposable devices |
|       | 06.01.01.01.00 |  | insulin aspart human pyr injection 100 units/ml                                                      |
|       | 06.01.01.02.00 |  | insulin biphasic injection 100 units/ml                                                              |
|       | 06.01.01.02.00 |  | insulin biphasic isophane human prb injection 30:70; 100 units/ml                                    |
|       | 06.01.01.02.00 |  | insulin biphasic isophane human pyr injection 30:70; 100 units/ml                                    |
|       | 06.01.01.02.00 |  | insulin biphasic lispro human prb injection 25:75; 100 units/ml                                      |
|       | 06.01.01.02.00 |  | insulin biphasic lispro human prb injection 50:50; 100 units/ml                                      |
|       | 06.01.01.02.00 |  | Insulin degludec 100units/ml solution for injection 3ml pre-filled disposable devices                |
|       | 06010102       |  | Insulin degludec 200units/ml solution for injection 3ml p...                                         |
|       | 06.01.01.02.00 |  | Insulin degludec 200units/ml solution for injection 3ml pre-filled disposable devices                |
|       | 06010102       |  | Insulin Detemir Solution for injection 100 units/ml 3 ml pre-filled pen                              |
|       | 06.01.01.02.00 |  | Insulin detemir 100units/ml solution for injection 3ml cartridges                                    |
|       | 06.01.01.02.00 |  | Insulin detemir 100units/ml solution for injection 3ml pre-filled disposable devices                 |



|       |                |  |                                                                                                              |
|-------|----------------|--|--------------------------------------------------------------------------------------------------------------|
|       | 06.01.01.02.00 |  | insulin detemir injection solution 100 units/ml                                                              |
|       | 06010102       |  | Insulin Glargine Injection 100 units/ml 3 ml cartridge                                                       |
|       | 06010102       |  | Insulin Glargine Pre-filled Disposable Pen 100 units/ml 3 ml pen                                             |
|       | 06010102       |  | INSULIN GLARGINE 100UNITS/ML 3ML CARTIDGES 100UNITS/ML                                                       |
|       | 06.01.01.02.00 |  | Insulin glargine 100units/ml solution for injection 10ml vials                                               |
| f291. | 06010102       |  | Insulin glargine 100units/ml solution for injection 3ml c...                                                 |
|       | 06.01.01.02.00 |  | Insulin glargine 100units/ml solution for injection 3ml cartridges                                           |
|       | 06.01.01.02.00 |  | Insulin glargine 100units/ml solution for injection 3ml pre-filled disposable devices                        |
|       | 06.01.01.02.00 |  | Insulin glargine 300units/ml solution for injection 1.5ml pre-filled disposable devices                      |
|       | 06.01.01.02.00 |  | insulin glargine injection 100 units/ml                                                                      |
|       | 06.01.01.01.00 |  | Insulin glulisine 100units/ml solution for injection 3ml cartridges                                          |
|       | 06.01.01.01.00 |  | Insulin glulisine 100units/ml solution for injection 3ml pre-filled disposable devices                       |
|       | 06.01.01.02.00 |  | Insulin isophane biphasic human 30/70 100units/ml suspension for injection 10ml vials                        |
|       | 06.01.01.02.00 |  | Insulin isophane biphasic human 30/70 100units/ml suspension for injection 3ml cartridges                    |
|       | 06.01.01.02.00 |  | Insulin isophane biphasic human 30/70 100units/ml suspension for injection 3ml pre-filled disposable devices |
|       | 06.01.01.02.00 |  | insulin isophane biphasic human crb injection 25:75; 100 units/ml                                            |
|       | 06.01.01.02.00 |  | Insulin isophane biphasic porcine 30/70 100units/ml suspension for injection 3ml cartridges                  |
|       | 06.01.01.02.00 |  | Insulin isophane human 100units/ml suspension for injection 1.5ml cartridges                                 |
|       | 06.01.01.02.00 |  | Insulin isophane human 100units/ml suspension for injection 3ml cartridges                                   |
|       | 06.01.01.02.00 |  | insulin isophane human emp injection 100 units/ml                                                            |
|       | 06.01.01.02.00 |  | insulin isophane human injection 100 units/ml                                                                |
|       | 06.01.01.02.00 |  | insulin isophane human prb injection 100 units/ml                                                            |
|       | 06.01.01.02.00 |  | Insulin isophane porcine 100units/ml suspension for injection 3ml cartridges                                 |
|       | 06.01.01.02.00 |  | insulin isophane porcine injection 100 units/ml                                                              |
|       | 06.01.01.01.00 |  | Insulin lispro 100units/ml solution for injection 10ml vials                                                 |
|       | 06.01.01.01.00 |  | Insulin lispro 100units/ml solution for injection 3ml cartridges                                             |
|       | 06.01.01.01.00 |  | Insulin lispro 100units/ml solution for injection 3ml pre-filled disposable devices                          |
|       | 06.01.01.02.00 |  | Insulin lispro biphasic 25/75 100units/ml suspension for injection 3ml cartridges                            |
|       | 06.01.01.01.00 |  | insulin lispro human prb injection 100 units/ml                                                              |
|       | 06.01.03.00.00 |  | insulin neutral human injection 100 units/ml                                                                 |

|       |                |  |                                                                                                                         |
|-------|----------------|--|-------------------------------------------------------------------------------------------------------------------------|
|       | 06.01.01.01.00 |  | insulin soluble bovine injection 100 units/ml                                                                           |
|       | 06.01.03.00.00 |  | Insulin soluble human 100units/ml solution for injection 10ml vials                                                     |
|       | 06.01.03.00.00 |  | Insulin soluble human 100units/ml solution for injection 3ml cartridges                                                 |
|       | 06.01.01.01.00 |  | insulin soluble human prb injection 100 units/ml                                                                        |
|       | 06.01.01.01.00 |  | insulin soluble human pyr injection 100 units/ml                                                                        |
|       | 06010103       |  | INSULIN SYRINGE 1 MLDISPOSABLE                                                                                          |
|       | 06010103       |  | Insulin Syringe-P42 1ml disposable                                                                                      |
|       | 06010103       |  | INSULIN SYRINGES 1ML                                                                                                    |
|       | 06.01.01.02.00 |  | Insuman Basal 100units/ml suspension for injection 3ml cartridges (Sanofi)                                              |
|       | 06.01.01.02.00 |  | Insuman Basal 100units/ml suspension for injection 3ml pre-filled SoloStar pen (Sanofi)                                 |
|       | 06010102       |  | Insuman Basal Solostar Pre-filled Disposable Pen 100 units/ml 3 ml pen                                                  |
|       | 06010102       |  | Insuman Comb 15 Injection (cartridges) 100 units/ml 3 ml cartridge                                                      |
| f286. | 06010151       |  | Insuman Comb 15 100units/ml suspension for injection 3ml ...                                                            |
|       | 06.01.01.02.00 |  | Insuman Comb 15 100units/ml suspension for injection 3ml cartridges (Sanofi)                                            |
|       | 06010102       |  | Insuman Comb 15 Optiset Pre-filled Disposable Pen 100 units/ml 3 ml pen                                                 |
|       | 06010102       |  | INSUMAN COMB 15 OPTISET PRE LOADED DISPOSABLE PEN 3ML INJ 100UNITS/ML                                                   |
|       | 06.01.01.02.00 |  | Insuman Comb 25 100units/ml suspension for injection 3ml cartridges (Sanofi)                                            |
|       | 06.01.01.02.00 |  | Insuman Comb 25 100units/ml suspension for injection 3ml pre-filled SoloStar pen (Sanofi)                               |
|       | 06010102       |  | INSUMAN COMB 25 CARTRIDGE 3ML INJ 100UNITS/ML                                                                           |
|       | 06010102       |  | Insuman Comb 50 Injection (cartridges) 100 units/ml 3 ml cartridge                                                      |
| f28C. | 06010151       |  | Insuman Comb 50 100units/ml suspension for injection 3ml ...                                                            |
|       | 06.01.01.02.00 |  | Insuman Comb 50 100units/ml suspension for injection 3ml cartridges (Sanofi)                                            |
|       | 06.01.01.01.00 |  | Insuman Rapid 100units/ml solution for injection 3ml pre-filled OptiSet pen (Sanofi)                                    |
|       | 06.01.01.03.00 |  | Insupen hypodermic insulin needles for pre-filled / reusable pen injectors screw on 4mm/32gauge (Spirit Healthcare Ltd) |
|       | 06.01.01.03.00 |  | Insupen hypodermic insulin needles for pre-filled / reusable pen injectors screw on 4mm/33gauge (Spirit Healthcare Ltd) |
|       | 06.01.01.03.00 |  | Insupen hypodermic insulin needles for pre-filled / reusable pen injectors screw on 6mm/31gauge (Spirit Healthcare Ltd) |

|       |                |  |                                                                                                                                                                    |
|-------|----------------|--|--------------------------------------------------------------------------------------------------------------------------------------------------------------------|
|       | 06.01.01.03.00 |  | Insupen hypodermic insulin needles for pre-filled / reusable pen injectors screw on 8mm/31gauge (Spirit Healthcare Ltd)                                            |
|       | 06.01.01.03.00 |  | Insupen hypodermic insulin needles for pre-filled / reusable pen injectors screw on 8mm/32gauge (Spirit Healthcare Ltd)                                            |
|       | 06.01.02.03.00 |  | Invokana 100mg tablets (Janssen-Cilag Ltd)                                                                                                                         |
|       | 06.01.02.03.00 |  | Invokana 300mg tablets (Janssen-Cilag Ltd)                                                                                                                         |
|       | 06.01.01.02.00 |  | isophane insulin injection 100 units/ml                                                                                                                            |
|       | 06010203       |  | Janumet Tablets 50 mg + 1000 mg                                                                                                                                    |
| fte1. | 06010203       |  | Janumet 50mg/1000mg tablets (Merck Sharp & Dohme Ltd)                                                                                                              |
|       | 06.01.02.03.00 |  | Janumet 50mg/1000mg tablets (Merck Sharp & Dohme Ltd)                                                                                                              |
|       | 06010203       |  | Januvia Tablets 100 mg                                                                                                                                             |
| ft81. | 06010203       |  | Januvia 100mg tablets (Merck Sharp & Dohme Ltd)                                                                                                                    |
|       | 06.01.02.03.00 |  | Januvia 100mg tablets (Merck Sharp & Dohme Ltd)                                                                                                                    |
|       | 06010203       |  | JANUVIA TABLETS 100MG                                                                                                                                              |
|       | 06010203       |  | Januvia TABS 100MG                                                                                                                                                 |
| ftg3. | 06010203       |  | Jentaduetto 2.5mg/1000mg tablets (Boehringer Ingelheim Ltd)                                                                                                        |
|       | 06.01.02.02.00 |  | Jentaduetto 2.5mg/1000mg tablets (Boehringer Ingelheim Ltd)                                                                                                        |
|       | 06.01.01.03.00 |  | Kendall Magellan hypodermic U100 insulin syringe sterile single use / single patient use 0.3ml with 8mm safety needle 0.3mm/30gauge (Covidien (UK) Commercial Ltd) |
|       | 06.01.01.03.00 |  | Kendall Magellan hypodermic U100 insulin syringe sterile single use / single patient use 0.5ml with 8mm safety needle 0.3mm/30gauge (Covidien (UK) Commercial Ltd) |
|       | 06010102       |  | Lantus Injection 100 units/ml 10 ml vial                                                                                                                           |
|       | 06010102       |  | Lantus Injection 100 units/ml 3 ml cartridge                                                                                                                       |
| f295. | 06010102       |  | Lantus 100units/ml solution for injection 10ml vials (San...                                                                                                       |
|       | 06.01.01.02.00 |  | Lantus 100units/ml solution for injection 10ml vials (Sanofi)                                                                                                      |
|       | 06.01.01.02.00 |  | Lantus 100units/ml solution for injection 3ml cartridges (Sanofi)                                                                                                  |
| f294. | 06010102       |  | Lantus 100units/ml solution for injection 3ml cartridges ...                                                                                                       |
|       | 06.01.01.02.00 |  | Lantus 100units/ml solution for injection 3ml OptiClik cartridges (Sanofi)                                                                                         |
| f298. | 06010102       |  | Lantus 100units/ml solution for injection 3ml pre-filled ...                                                                                                       |
|       | 06.01.01.02.00 |  | Lantus 100units/ml solution for injection 3ml pre-filled OptiSet pen (Sanofi)                                                                                      |
|       | 06.01.01.02.00 |  | Lantus 100units/ml solution for injection 3ml pre-filled SoloStar pen (Sanofi)                                                                                     |
|       | 06010102       |  | Lantus Cartridge 3ml INJ 100UNITS/ML                                                                                                                               |
|       | 06010102       |  | LANTUS CARTRIDGE 3ML INJ 100UNITS/ML                                                                                                                               |
| f294. | 06010102       |  | LANTUS CARTRIDGE inj soln 100 units/ml                                                                                                                             |

|       |                |  |                                                                                          |
|-------|----------------|--|------------------------------------------------------------------------------------------|
|       | 06010102       |  | lantus Glargine 3ml cartridge                                                            |
|       | 06.01.01.02.00 |  | LANTUS injection 100 units/ml [AVENTIS]                                                  |
|       | 06010102       |  | Lantus Insulin 3ml cartridge                                                             |
|       | 06010102       |  | LANTUS INSULIN 3ML CARTRIDGES                                                            |
|       | 06010102       |  | LANTUS INSULIN 3ML OPTISET                                                               |
|       | 06010102       |  | LANTUS INSULIN CARTRIDGES 5 X 3 ML                                                       |
|       | 06010102       |  | Lantus insulin INJ 3ml cartridge                                                         |
|       | 06010102       |  | LANTUS INSULIN Penfill Cartiridges 3ml                                                   |
|       | 06010102       |  | LANTUS LANTUS INSULIN 5 CART 3ML                                                         |
|       | 06010102       |  | Lantus Opticlick Cartridge 3ml INJ 100UNITS/ML                                           |
|       | 06010102       |  | Lantus Opticlik Injection 100 units/ml 3 ml cartridge                                    |
|       | 06010102       |  | Lantus OptiSet                                                                           |
|       | 06010102       |  | Lantus Optiset Pre-filled Disposable Pen 100 units/ml 3 ml pen                           |
|       | 06010102       |  | LANTUS OPTISET 3 ML PEN                                                                  |
|       | 06010102       |  | Lantus Optiset Prefilled Disposable Pen 3ml INJ 100UNITS/ML                              |
|       | 06010102       |  | LANTUS OPTISET PREFILLED DISPOSABLE PEN 3ML INJ 100UNITS/ML                              |
|       | 06010102       |  | Lantus Solostar Pre-filled Disposable Pen 100 units/ml 3 ml pen                          |
|       | 06010102       |  | lantus solostar disposable pen pre filled syringe 100units per ml                        |
| f298. | 06010102       |  | LANTUS SOLOSTAR inj soln 100 units/ml                                                    |
|       | 06010102       |  | Lantus Solostar Pen                                                                      |
|       | 06010102       |  | Lantus Solostar Prefilled Disposable Pen 3ml INJ 100UNITS/ML                             |
|       | 06010102       |  | LANTUS SOLOSTAR PREFILLED DISPOSABLE PEN 3ML INJ 100UNITS/ML                             |
|       | 06010102       |  | Lantus Vial 10ml INJ 100UNITS/ML                                                         |
|       | 06010102       |  | LEVEMIR 3ML FLEXPEN                                                                      |
|       | 06010102       |  | Levemir Flexpen Solution for injection 100 units/ml 3 ml pre-filled pen                  |
| f2A2. | 06010102       |  | Levemir FlexPen 100units/ml solution for injection 3ml pr...                             |
|       | 06.01.01.02.00 |  | Levemir FlexPen 100units/ml solution for injection 3ml pre-filled pen (Novo Nordisk Ltd) |
|       | 06010102       |  | Levemir Flexpen 3ml Insulin                                                              |
|       | 06010102       |  | Levemir Flexpen Prefilled Pen 3ml INJ 100UNITS/ML                                        |
|       | 06010102       |  | LEVEMIR FLEXPEN PREFILLED PEN 3ML INJ 100UNITS/ML                                        |
| f2A3. | 06010102       |  | Levemir InnoLet 100units/ml solution for injection 3ml pr...                             |
|       | 06.01.01.02.00 |  | Levemir InnoLet 100units/ml solution for injection 3ml pre-filled pen (Novo Nordisk Ltd) |
|       | 06010102       |  | LEVEMIR NOVO NORDISK FLEXIPEN INJ 3 ML                                                   |

|       |                |  |                                                                                                                                                                                       |
|-------|----------------|--|---------------------------------------------------------------------------------------------------------------------------------------------------------------------------------------|
|       | 06010102       |  | Levemir Penfill Injection (cartridges) 100 units/ml 3 ml cartridge                                                                                                                    |
|       | 06010102       |  | Levemir Penfill Injection (Cartridges) 100 units/ml 3 ml cartridge                                                                                                                    |
| f2A1. | 06010102       |  | Levemir Penfill 100units/ml solution for injection 3ml ca...                                                                                                                          |
|       | 06.01.01.02.00 |  | Levemir Penfill 100units/ml solution for injection 3ml cartridges (Novo Nordisk Ltd)                                                                                                  |
|       | 06010102       |  | Levemir Penfill 3ml INJ 100UNITS/ML                                                                                                                                                   |
|       | 06010102       |  | LEVEMIR PENFILL 3ML INJ 100UNITS/ML                                                                                                                                                   |
| f2A1. | 06010102       |  | LEVEMIR PENFILL inj soln 100 units/ml                                                                                                                                                 |
|       | 06010203       |  | Linagliptin Tablets 5 mg                                                                                                                                                              |
|       | 06.01.02.03.00 |  | Linagliptin 2.5mg / Metformin 1g tablets                                                                                                                                              |
|       | 06.01.02.02.00 |  | Linagliptin 2.5mg / Metformin 850mg tablets                                                                                                                                           |
|       | 06010203       |  | Linagliptin 2.5mg / Metformin 850mg tablets                                                                                                                                           |
| ftf2. | 06010203       |  | Linagliptin 5mg tablets                                                                                                                                                               |
|       | 06.01.02.03.00 |  | Linagliptin 5mg tablets                                                                                                                                                               |
|       | 06010203       |  | Liraglutide Solution for injection in pre-filled pen 6 mg/ml 3 ml pen                                                                                                                 |
| ftc2. | 06010203       |  | Liraglutide 6mg/ml solution for injection 3ml pre-filled ...                                                                                                                          |
|       | 06.01.02.03.00 |  | Liraglutide 6mg/ml solution for injection 3ml pre-filled disposable devices                                                                                                           |
|       | 06010203       |  | Liraglutide Prefilled Pen 3ml INJ 6MG/ML                                                                                                                                              |
|       | 06010203       |  | Lixisenatide Solution for injection 10 micrograms/0.2 ml 3 ml device                                                                                                                  |
|       | 06010203       |  | Lixisenatide Solution for injection 20 micrograms/0.2 ml 3 ml device                                                                                                                  |
| ftj2. | 06010203       |  | Lixisenatide 10micrograms/0.2ml solution for injection 3m...                                                                                                                          |
| ftj6. | 06010203       |  | Lixisenatide 10micrograms/0.2ml solution for injection 3m...                                                                                                                          |
|       | 06.01.02.03.00 |  | Lixisenatide 10micrograms/0.2ml solution for injection 3ml pre-filled disposable devices                                                                                              |
|       | 06.01.02.03.00 |  | Lixisenatide 10micrograms/0.2ml solution for injection 3ml pre-filled disposable devices and Lixisenatide 20micrograms/0.2ml solution for injection 3ml pre-filled disposable devices |
| ftj4. | 06010203       |  | Lixisenatide 20micrograms/0.2ml solution for injection 3m...                                                                                                                          |
|       | 06.01.02.03.00 |  | Lixisenatide 20micrograms/0.2ml solution for injection 3ml pre-filled disposable devices                                                                                              |
| ftj1. | 06010203       |  | Lyxumia 10micrograms/0.2ml solution for injection 3ml pre...                                                                                                                          |
| ftj5. | 06010203       |  | Lyxumia 10micrograms/0.2ml solution for injection 3ml pre...                                                                                                                          |
|       | 06.01.02.03.00 |  | Lyxumia 10micrograms/0.2ml solution for injection 3ml pre-filled pen (Sanofi)                                                                                                         |
|       | 06.01.02.03.00 |  | Lyxumia 10micrograms/20micrograms treatment initiation pack (Sanofi)                                                                                                                  |

|       |                 |  |                                                                               |
|-------|-----------------|--|-------------------------------------------------------------------------------|
| ftj3. | 06010203        |  | Lyxumia 20micrograms/0.2ml solution for injection 3ml pre...                  |
|       | 06.01.02.03.00  |  | Lyxumia 20micrograms/0.2ml solution for injection 3ml pre-filled pen (Sanofi) |
|       | 06.01.02.02.00  |  | Metabet SR 1000mg tablets (Morningside Healthcare Ltd)                        |
|       | 06.01.02.02.00  |  | Metabet SR 500mg tablets (Actavis UK Ltd)                                     |
| f41E. | 06010202        |  | Metabet SR 500mg tablets (Morningside Healthcare Ltd)                         |
|       | 06.01.02.02.00  |  | Metabet SR 500mg tablets (Morningside Healthcare Ltd)                         |
|       | 06.01.02.02.00  |  | metformin (roi) tablets 1000mg                                                |
| ftez. | 06010203        |  | Metformin 1g / Sitagliptin 50mg tablets                                       |
|       | 06.01.02.02.00  |  | Metformin 1g / Sitagliptin 50mg tablets                                       |
| f41u. | 06010202        |  | Metformin 1g modified-release tablets                                         |
|       | 06.01.02.02.00  |  | Metformin 1g modified-release tablets                                         |
|       | 06.01.02.02.00  |  | Metformin 1g modified-release tablets (Actavis UK Ltd)                        |
|       | 06.01.02.02.00  |  | Metformin 1g oral powder sachets sugar free                                   |
| f41.. | 06010202        |  | Metformin 1g/5ml oral solution sugar free                                     |
| f41x. | 06010202        |  | Metformin 500mg modified-release tablets                                      |
|       | 06.01.02.02.00  |  | Metformin 500mg modified-release tablets                                      |
|       | 06.01.02.02.00  |  | Metformin 500mg modified-release tablets (Actavis UK Ltd)                     |
|       | 06.01.02.02.00  |  | Metformin 500mg modified-release tablets (Almus Pharmaceuticals Ltd)          |
| f41t. | 06010202        |  | Metformin 500mg oral powder sachets sugar free                                |
|       | 06.01.02.02.00  |  | Metformin 500mg oral powder sachets sugar free                                |
| f41y. | 06010202        |  | Metformin 500mg tablets                                                       |
|       | 06.01.02.02.00  |  | Metformin 500mg tablets                                                       |
|       | 0601022B0AAABAB |  | Metformin 500mg tablets                                                       |
|       | 06.01.02.02.00  |  | Metformin 500mg tablets (A A H Pharmaceuticals Ltd)                           |
|       | 0601022B0AAABAB |  | Metformin 500mg tablets (A A H Pharmaceuticals Ltd)                           |
|       | 06.01.02.02.00  |  | Metformin 500mg tablets (Actavis UK Ltd)                                      |
|       | 06.01.02.02.00  |  | Metformin 500mg tablets (Almus Pharmaceuticals Ltd)                           |
|       | 06.01.02.02.00  |  | Metformin 500mg tablets (Kent Pharmaceuticals Ltd)                            |
|       | 06.01.02.02.00  |  | Metformin 500mg tablets (Mylan Ltd)                                           |
|       | 06.01.02.02.00  |  | Metformin 500mg tablets (Sandoz Ltd)                                          |
|       | 06.01.02.02.00  |  | Metformin 500mg tablets (Teva UK Ltd)                                         |
|       | 06.01.02.02.00  |  | Metformin 500mg tablets (Wockhardt UK Ltd)                                    |
|       | 06.01.02.02.00  |  | Metformin 500mg tablets (Zentiva)                                             |
| f41w. | 06010202        |  | Metformin 500mg/5ml oral solution sugar free                                  |
|       | 06.01.02.02.00  |  | Metformin 500mg/5ml oral solution sugar free                                  |
|       | 06.01.02.02.00  |  | Metformin 500mg/5ml oral solution sugar free (A A H Pharmaceuticals Ltd)      |
|       | 06.01.02.02.00  |  | Metformin 500mg/5ml oral solution sugar free (Rosemont Pharmaceuticals Ltd)   |
| f41v. | 06010202        |  | Metformin 750mg modified-release tablets                                      |

|       |                 |  |                                                                            |
|-------|-----------------|--|----------------------------------------------------------------------------|
|       | 06.01.02.02.00  |  | Metformin 750mg modified-release tablets                                   |
| f41z. | 06010202        |  | Metformin 850mg tablets                                                    |
|       | 06.01.02.02.00  |  | Metformin 850mg tablets                                                    |
|       | 06.01.02.02.00  |  | Metformin 850mg tablets (A A H Pharmaceuticals Ltd)                        |
|       | 06.01.02.02.00  |  | Metformin 850mg tablets (Actavis UK Ltd)                                   |
|       | 06.01.02.02.00  |  | Metformin 850mg tablets (Kent Pharmaceuticals Ltd)                         |
|       | 06.01.02.02.00  |  | Metformin 850mg tablets (Teva UK Ltd)                                      |
|       | 06.01.02.02.00  |  | Metformin 850mg tablets (Wockhardt UK Ltd)                                 |
|       | 06010203        |  | Metformin And Linagliptin Tablets 1000 mg + 2.5 mg                         |
|       | 06010203        |  | Metformin And Sitagliptin Tablets 1000 mg + 50 mg                          |
|       | 06010203        |  | Metformin And Vildagliptin Tablets 1 gram + 50 mg                          |
|       | 06010203        |  | Metformin And Vildagliptin Tablets 850 mg + 50 mg                          |
|       | 06010202        |  | Metformin Hydrochloride M/R tablets 1 gram                                 |
|       | 06010202        |  | Metformin Hydrochloride M/R tablets 500 mg                                 |
|       | 06010202        |  | Metformin Hydrochloride M/R tablets 750 mg                                 |
|       | 06010202        |  | Metformin Hydrochloride Oral solution 500 mg/5 ml                          |
|       | 06010202        |  | Metformin Hydrochloride Oral solution Sugar Free 500 mg/5 ml               |
|       | 06010202        |  | Metformin Hydrochloride Sugar free suspension 500 mg/5 ml                  |
|       | 0601022B0AAABAB |  | Metformin Hydrochloride Tablets 500 mg                                     |
|       | 0601022B0AADAD  |  | Metformin Hydrochloride Tablets 850 mg                                     |
|       | 06010202        |  | METFORMIN HYDROCHLORIDE MR TABLETS 500MG                                   |
|       | 06010202        |  | Metformin Hydrochloride Mr TABS 1G                                         |
|       | 06010202        |  | Metformin Hydrochloride Mr TABS 500MG                                      |
|       | 06010202        |  | METFORMIN HYDROCHLORIDE SF ORAL SOLN 500MG/5ML                             |
|       | 06010202        |  | Metformin Hydrochloride Sf Powder For Oral Solution SACH 500MG             |
| f41y. | 06010202        |  | Metformin Hydrochloride Tablets 500mg                                      |
|       | 0601022B0AAABAB |  | Metformin Hydrochloride TABLETS 500MG                                      |
|       | 0601022B0AAABAB |  | METFORMIN HYDROCHLORIDE TABLETS 500MG                                      |
|       | 0601022B0AADAD  |  | METFORMIN HYDROCHLORIDE TABLETS 850MG                                      |
|       | 0601022B0AAABAB |  | Metformin Hydrochloride TABS 500MG                                         |
|       | 0601022B0AADAD  |  | Metformin Hydrochloride TABS 850MG                                         |
| f41x. | 06010202        |  | METFORMIN mr tab 500mg                                                     |
|       | 06.01.02.02.00  |  | metformin oral suspension 100mg/ml                                         |
|       | 0601022B0AAABAB |  | METFORMIN TABLETS 500MG                                                    |
|       | 0601022B0AAABAB |  | METFORMIN tablets TAB 500mg-P42 0                                          |
| f41y. | 06010202        |  | METFORMIN tabs 500mg                                                       |
|       | 06.01.02.01.00  |  | Minodiab 5mg tablets (Pfizer Ltd)                                          |
|       | 06.01.01.02.00  |  | Mixtard 10 NovoLet 100units/ml suspension for injection (Novo Nordisk Ltd) |

|  |                |  |                                                                                                 |
|--|----------------|--|-------------------------------------------------------------------------------------------------|
|  | 06.01.01.02.00 |  | MIXTARD 10 PENFILL 100 units/ml [NOVO]                                                          |
|  | 06.01.01.02.00 |  | Mixtard 10 Penfill 100units/ml suspension for injection 3ml cartridges (Novo Nordisk Ltd)       |
|  | 06010102       |  | Mixtard 10 Penfill 3ml INJ 100UNITS/ML                                                          |
|  | 06010102       |  | Mixtard 20 Novolet Pre-filled Disposable Injection 100 units/ml 3 ml device                     |
|  | 06.01.01.02.00 |  | Mixtard 20 NovoLet 100units/ml suspension for injection (Novo Nordisk Ltd)                      |
|  | 06.01.01.02.00 |  | MIXTARD 20 PENFILL 100 units/ml [NOVO]                                                          |
|  | 06.01.01.02.00 |  | Mixtard 20 Penfill 100units/ml suspension for injection 3ml cartridges (Novo Nordisk Ltd)       |
|  | 06010102       |  | Mixtard 20 Penfill 3ml INJ 100UNITS/ML                                                          |
|  | 06010102       |  | MIXTARD 20 PENFILL 3ML INJ 100UNITS/ML                                                          |
|  | 06.01.01.02.00 |  | Mixtard 30 100units/ml suspension for injection 10ml vials (Novo Nordisk Ltd)                   |
|  | 06.01.01.02.00 |  | MIXTARD 30 ge injection 100 units/ml [NOVO]                                                     |
|  | 06010102       |  | Mixtard 30 Innolet Suspension For Injection 100 units/ml 3 ml pre-filled pen                    |
|  | 06.01.01.02.00 |  | Mixtard 30 InnoLet 100units/ml suspension for injection 3ml pre-filled pen (Novo Nordisk Ltd)   |
|  | 06010102       |  | Mixtard 30 Innolet Prefilled Device 3ml INJ 100UNITS/ML                                         |
|  | 06010102       |  | MIXTARD 30 INNOLET PREFILLED DEVICE 3ML INJ 100UNITS/ML                                         |
|  | 06010102       |  | Mixtard 30 Novolet Pre-filled Disposable Injection 100 units/ml 3 ml device                     |
|  | 06.01.01.02.00 |  | Mixtard 30 NovoLet 100units/ml suspension for injection (Novo Nordisk Ltd)                      |
|  | 06010102       |  | Mixtard 30 Novolet Pen 3ml INJ 100UNITS/ML                                                      |
|  | 06010102       |  | Mixtard 30 Penfill Injection 100 units/ml 3 ml cartridge                                        |
|  | 06.01.01.02.00 |  | MIXTARD 30 PENFILL 100 units/ml [NOVO]                                                          |
|  | 06.01.01.02.00 |  | Mixtard 30 Penfill 100units/ml suspension for injection 3ml cartridges (Novo Nordisk Ltd)       |
|  | 06010102       |  | Mixtard 30 Penfill 3ml INJ 100UNITS/ML                                                          |
|  | 06010102       |  | MIXTARD 30 PENFILL 3ML INJ 100UNITS/ML                                                          |
|  | 06010102       |  | Mixtard 30 Vial 10ml INJ 100UNITS/ML                                                            |
|  | 06.01.01.02.00 |  | MIXTARD 30/70 injection 100 units/ml [NOVO]                                                     |
|  | 06010102       |  | Mixtard 40 Novolet Pen 3ml INJ 100UNITS/ML                                                      |
|  | 06.01.01.02.00 |  | MIXTARD 40 PENFILL 100 units/ml [NOVO]                                                          |
|  | 06.01.01.02.00 |  | Mixtard 40 Penfill 100units/ml suspension for injection 3ml cartridges (Novo Nordisk Ltd)       |
|  | 06010102       |  | Mixtard 40 Penfill 3ml INJ 100UNITS/ML                                                          |
|  | 06010102       |  | MIXTARD 40 PENFILL 3ML INJ 100UNITS/ML                                                          |
|  | 06.01.01.02.00 |  | MIXTARD 50 PENFILL 100 units/ml [NOVO]                                                          |
|  | 06.01.01.02.00 |  | Mixtard 50 Penfill 100units/ml suspension for injection 3ml cartridges (Novo Nordisk Ltd)       |
|  | 06.01.01.03.00 |  | Monoject hypodermic needle sterile single use 0.4mm/27gauge 12mm (Covidien (UK) Commercial Ltd) |



|       |                |  |                                                                                                                                                       |
|-------|----------------|--|-------------------------------------------------------------------------------------------------------------------------------------------------------|
|       | 06.01.01.04.00 |  | Monoject hypodermic U100 insulin syringe sterile single use / single patient use 0.5ml with 12mm needle 0.36mm/28gauge (Covidien (UK) Commercial Ltd) |
|       | 06.01.01.03.00 |  | Monoject hypodermic U100 insulin syringe sterile single use / single patient use 1ml with 12mm needle 0.36mm/28gauge (Covidien (UK) Commercial Ltd)   |
|       | 06.01.01.02.00 |  | Monotard 100units/ml suspension for injection 10ml vials (Novo Nordisk Ltd)                                                                           |
|       | 06.01.01.02.00 |  | MONOTARD MC injection 100 units/ml [NOVO]                                                                                                             |
|       | 06.01.02.03.00 |  | Nateglinide 120mg tablets                                                                                                                             |
|       | 06.01.02.03.00 |  | Nateglinide 180mg tablets                                                                                                                             |
|       | 06.01.02.03.00 |  | Nateglinide 60mg tablets                                                                                                                              |
|       | 06010203       |  | Nateglinide TABS 120MG                                                                                                                                |
|       | 06010203       |  | Nateglinide TABS 180MG                                                                                                                                |
|       | 06010203       |  | Nateglinide TABS 60MG                                                                                                                                 |
|       | 06010102       |  | NOVOMIX 30 FLEXPEN                                                                                                                                    |
|       | 06010102       |  | Novomix 30 Flexpen Suspension For Injection 100 units/ml 3 ml pre-filled pen                                                                          |
| fw22. | 06010102       |  | NovoMix 30 FlexPen 100units/ml suspension for injection 3...                                                                                          |
| fw22. | 06010151       |  | NovoMix 30 FlexPen 100units/ml suspension for injection 3...                                                                                          |
|       | 06.01.01.02.00 |  | NovoMix 30 FlexPen 100units/ml suspension for injection 3ml pre-filled pen (Novo Nordisk Ltd)                                                         |
|       | 06010102       |  | Novomix 30 Flexpen Prefilled Pen 3ml INJ 100UNITS/ML                                                                                                  |
|       | 06010102       |  | NOVOMIX 30 FLEXPEN PREFILLED PEN 3ML INJ 100UNITS/ML                                                                                                  |
|       | 06.01.01.02.00 |  | NOVOMIX 30 injection 30:70; 100 units/ml [NOVO]                                                                                                       |
|       | 06010102       |  | Novomix 30 Penfill Injection (cartridges) 100 units/ml 3 ml cartridge                                                                                 |
| fw21. | 06010102       |  | NovoMix 30 Penfill 100units/ml suspension for injection 3...                                                                                          |
| fw21. | 06010151       |  | NovoMix 30 Penfill 100units/ml suspension for injection 3...                                                                                          |
|       | 06.01.01.02.00 |  | NovoMix 30 Penfill 100units/ml suspension for injection 3ml cartridges (Novo Nordisk Ltd)                                                             |
|       | 06010102       |  | Novomix 30 Penfill 3ml INJ 100UNITS/ML                                                                                                                |
|       | 06010102       |  | NOVOMIX 30 PENFILL 3ML INJ 100UNITS/ML                                                                                                                |
|       | 06.01.02.03.00 |  | NovoNorm 1mg tablets (Novo Nordisk Ltd)                                                                                                               |
|       | 06.01.02.03.00 |  | NovoNorm 2mg tablets (Novo Nordisk Ltd)                                                                                                               |
|       | 06.01.02.03.00 |  | NovoNorm 500microgram tablets (Novo Nordisk Ltd)                                                                                                      |
|       | 06.01.01.03.00 |  | NovoPen 3 Demi hypodermic insulin injection pen reusable for 3ml cartridge 0.5 unit dial up / range 1-35 units (Novo Nordisk Ltd)                     |
|       | 06.01.01.04.00 |  | NovoPen 3 Fun hypodermic insulin injection pen reusable for 3ml cartridge 1 unit dial up / range 2-70 units Red (Novo Nordisk Ltd)                    |

|       |                |  |                                                                                                                                        |
|-------|----------------|--|----------------------------------------------------------------------------------------------------------------------------------------|
| pm1y. | 06010103       |  | NovoPen 4 hypodermic insulin injection pen reusable for 3...                                                                           |
|       | 06.01.01.04.00 |  | NovoPen 5 hypodermic insulin injection pen reusable for 3ml cartridge 1 unit dial up / range 1-60 units Blue (Novo Nordisk Ltd)        |
|       | 06.01.01.04.00 |  | NovoPen CLASSIC injection device [NOVO]                                                                                                |
|       | 06.01.01.03.00 |  | NovoPen Echo hypodermic insulin injection pen reusable for 3ml cartridge 0.5 unit dial up / range 0.5-30 units Blue (Novo Nordisk Ltd) |
|       | 06.01.01.01.00 |  | NOVOPEN injection device 100 units/ml [NOVO]                                                                                           |
|       | 06010101       |  | Novorapid Injection 100 units/ml 10 ml vial                                                                                            |
| f141. | 06010101       |  | NovoRapid 100units/ml solution for injection 10ml vials (...)                                                                          |
|       | 06.01.01.01.00 |  | NovoRapid 100units/ml solution for injection 10ml vials (Novo Nordisk Ltd)                                                             |
|       | 06010101       |  | Novorapid Flexpen Pre-filled Disposable Pen 100 units/ml 3 ml pen                                                                      |
|       | 06010101       |  | Novorapid Flexpen Solution for injection 100 units/ml 3 ml pre-filled pen                                                              |
| f144. | 06010101       |  | NovoRapid FlexPen 100units/ml solution for injection 3ml ...                                                                           |
|       | 06.01.01.01.00 |  | NovoRapid FlexPen 100units/ml solution for injection 3ml pre-filled pen (Novo Nordisk Ltd)                                             |
| f144. | 06010101       |  | NOVORAPID FLEXPEN inj soln 100 units/ml                                                                                                |
|       | 06010101       |  | Novorapid Flexpen Prefilled Pen 3ml INJ 100UNITS/ML                                                                                    |
|       | 06010101       |  | NOVORAPID FLEXPEN PREFILLED PEN 3ML INJ 100UNITS/ML                                                                                    |
|       | 06010101       |  | Novorapid Flextouch Solution for injection 100 units/ml 3 ml pre-filled pen                                                            |
| f145. | 06010101       |  | NovoRapid FlexTouch 100units/ml solution for injection 3m...                                                                           |
|       | 06.01.01.01.00 |  | NovoRapid FlexTouch 100units/ml solution for injection 3ml pre-filled pen (Novo Nordisk Ltd)                                           |
|       | 06010101       |  | Novorapid Novolet Prefilled syringes 100 units/ml                                                                                      |
|       | 06.01.01.01.00 |  | NovoRapid Novolet 100units/ml solution for injection (Novo Nordisk Ltd)                                                                |
|       | 06010101       |  | Novorapid Novolet 3ml INJ 100UNITS/ML                                                                                                  |
|       | 06010101       |  | NOVORAPID PENFIL 3ML INJ 100U/ML 5                                                                                                     |
|       | 06010101       |  | NOVORAPID PENFILL                                                                                                                      |
|       | 06010101       |  | Novorapid Penfill Cartridges (3 MI) 100 units/ml                                                                                       |
| f143. | 06010101       |  | NovoRapid Penfill 100units/ml solution for injection 3ml ...                                                                           |
|       | 06.01.01.01.00 |  | NovoRapid Penfill 100units/ml solution for injection 3ml cartridges (Novo Nordisk Ltd)                                                 |
|       | 06010101       |  | Novorapid Penfill 3ml INJ 100UNITS/ML                                                                                                  |
|       | 06010101       |  | NOVORAPID PENFILL 3ML INJ 100UNITS/ML                                                                                                  |
| f143. | 06010101       |  | NOVORAPID PENFILL inj soln 100 units/ml                                                                                                |

|       |                |  |                                                                                                                      |
|-------|----------------|--|----------------------------------------------------------------------------------------------------------------------|
|       | 06.01.01.01.00 |  | NovoRapid PumpCart 100units/ml solution for injection 1.6ml cartridges (Novo Nordisk Ltd)                            |
|       | 06010101       |  | Novorapid Vial 10ml INJ 100UNITS/ML                                                                                  |
|       | 06010101       |  | NOVORAPID VIAL 10ML INJ 100UNITS/ML                                                                                  |
|       | 06.01.02.03.00 |  | Onglyza 2.5mg tablets (AstraZeneca UK Ltd)                                                                           |
|       | 06.01.01.04.00 |  | OptiClik hypodermic insulin injection pen reusable for 3ml cartridge 1 unit dial up / range 1-80 units Blue (Sanofi) |
|       | 06.01.01.03.00 |  | OptiClik hypodermic insulin injection pen reusable for 3ml cartridge 1 unit dial up / range 1-80 units Grey (Sanofi) |
|       | 06.01.01.02.00 |  | PENMIX 30/70 injection 100 units/ml [NOVO]                                                                           |
|       | 06.01.01.02.00 |  | PENMIX 30/70 PENFILL injection 100 units/ml [NOVO]                                                                   |
| ft7.. | 06010203       |  | Pioglitazone 15mg / Metformin 850mg tablets                                                                          |
|       | 06.01.02.02.00 |  | Pioglitazone 15mg / Metformin 850mg tablets                                                                          |
| ft5z. | 06010203       |  | Pioglitazone 15mg tablets                                                                                            |
|       | 06.01.02.03.00 |  | Pioglitazone 15mg tablets                                                                                            |
|       | 06010203       |  | Pioglitazone 15mg tablets                                                                                            |
|       | 06.01.02.03.00 |  | Pioglitazone 15mg tablets (A A H Pharmaceuticals Ltd)                                                                |
|       | 06.01.02.03.00 |  | Pioglitazone 15mg tablets (Actavis UK Ltd)                                                                           |
|       | 06.01.02.03.00 |  | Pioglitazone 15mg tablets (Teva UK Ltd)                                                                              |
| ft5y. | 06010203       |  | Pioglitazone 30mg tablets                                                                                            |
|       | 06.01.02.03.00 |  | Pioglitazone 30mg tablets                                                                                            |
|       | 06010203       |  | Pioglitazone 30mg tablets                                                                                            |
|       | 06010203       |  | PIOGLITAZONE 30MG TABLETS                                                                                            |
|       | 06.01.02.03.00 |  | Pioglitazone 30mg tablets (A A H Pharmaceuticals Ltd)                                                                |
|       | 06.01.02.03.00 |  | Pioglitazone 30mg tablets (Actavis UK Ltd)                                                                           |
| ft5x. | 06010203       |  | Pioglitazone 45mg tablets                                                                                            |
|       | 06.01.02.03.00 |  | Pioglitazone 45mg tablets                                                                                            |
|       | 06010203       |  | Pioglitazone And Metformin Tablets 15 mg + 850 mg                                                                    |
|       | 06010203       |  | Pioglitazone Hydrochloride Tablets 15 mg                                                                             |
|       | 06010203       |  | Pioglitazone Hydrochloride Tablets 30 mg                                                                             |
|       | 06010203       |  | Pioglitazone Hydrochloride Tablets 45 mg                                                                             |
|       | 06010203       |  | Pioglitazone TABLETS 15MG                                                                                            |
|       | 06010203       |  | PIOGLITAZONE TABLETS 15MG                                                                                            |
|       | 06010203       |  | Pioglitazone TABLETS 30MG                                                                                            |
|       | 06010203       |  | PIOGLITAZONE TABLETS 30MG                                                                                            |
|       | 06010203       |  | PIOGLITAZONE TABLETS 45MG                                                                                            |
| ft5z. | 06010203       |  | PIOGLITAZONE tabs 15mg                                                                                               |
|       | 06010203       |  | Pioglitazone TABS 15MG                                                                                               |
|       | 06010203       |  | Pioglitazone TABS 30MG                                                                                               |
| ft5x. | 06010203       |  | PIOGLITAZONE tabs 45mg                                                                                               |
|       | 06010203       |  | Pioglitazone TABS 45MG                                                                                               |
|       | 06010101       |  | Pork Actrapid Injection 100 units/ml 10 ml vial                                                                      |

|       |                 |  |                                                                                    |
|-------|-----------------|--|------------------------------------------------------------------------------------|
|       | 06.01.03.00.00  |  | Pork Actrapid 100units/ml solution for injection 10ml vials (Novo Nordisk Ltd)     |
|       | 06010101        |  | Pork Actrapid Vial 10ml INJ 100UNITS/ML                                            |
|       | 06010102        |  | Pork Insulatard Injection 100 units/ml 10 ml vial                                  |
|       | 06.01.01.02.00  |  | Pork Insulatard 100units/ml suspension for injection 10ml vials (Novo Nordisk Ltd) |
|       | 06010102        |  | Pork Insulatard Vial 10ml INJ 100UNITS/ML                                          |
|       | 06.01.01.02.00  |  | Pork Mixtard 30 100units/ml suspension for injection 10ml vials (Novo Nordisk Ltd) |
|       | 0601012D0BCABAI |  | Pork Mixtard 30 Vial 10ml INJ 100UNITS/ML                                          |
|       | 0601011N0BFAAAC |  | Pork Velosulin Injection 100 units/ml                                              |
|       | 06.01.01.01.00  |  | PORK VELOSULIN injection 100 units/ml [NOVO]                                       |
|       | 0601011N0BFAAAC |  | PORK VELOSULIN VIAL 10ML INJ 100UNITS/ML                                           |
|       | 06.01.02.01.00  |  | RASTINON tablets 500mg [HOECHSTMAR]                                                |
|       | 06.01.02.03.00  |  | Repaglinide 1mg tablets                                                            |
|       | 06.01.02.03.00  |  | Repaglinide 1mg tablets (Actavis UK Ltd)                                           |
|       | 06.01.02.03.00  |  | Repaglinide 2mg tablets                                                            |
|       | 06.01.02.03.00  |  | Repaglinide 500microgram tablets                                                   |
|       | 0601023R0AAABAB |  | Repaglinide TABS 1MG                                                               |
|       | 06.01.02.03.00  |  | ROMOZIN tablets 200mg [GLAXO]                                                      |
|       | 06.01.02.02.00  |  | Rosiglitazone 1mg / Metformin 500mg tablets                                        |
|       | 06.01.02.03.00  |  | Rosiglitazone 2mg / Metformin 1g tablets                                           |
|       | 06.01.02.03.00  |  | Rosiglitazone 2mg / Metformin 500mg tablets                                        |
|       | 06.01.02.03.00  |  | Rosiglitazone 4mg / Metformin 1g tablets                                           |
|       | 06.01.02.03.00  |  | Rosiglitazone 4mg tablets                                                          |
|       | 06010203        |  | ROSIGLITAZONE 4MG TABLETS                                                          |
|       | 06010203        |  | Rosiglitazone 8mg tab                                                              |
|       | 06.01.02.03.00  |  | Rosiglitazone 8mg tablets                                                          |
|       | 06010203        |  | Rosiglitazone And Metformin Tablets 2 mg + 1 gram                                  |
|       | 06010203        |  | Rosiglitazone And Metformin Tablets 2 mg + 500 mg                                  |
|       | 06010203        |  | Rosiglitazone And Metformin Tablets 4 mg + 1 gram                                  |
|       | 06010203        |  | Rosiglitazone Maleate Tablets 4 mg                                                 |
|       | 06010203        |  | Rosiglitazone Maleate Tablets 8 mg                                                 |
|       | 06010203        |  | ROSIGLITAZONE TABLETS 4MG                                                          |
|       | 06010203        |  | ROSIGLITAZONE TABLETS 8MG                                                          |
|       | 06010203        |  | Rosiglitazone TABS 4MG                                                             |
|       | 06010203        |  | Rosiglitazone TABS 8MG                                                             |
|       | 06010203        |  | Saxagliptin Tablets 2.5 mg                                                         |
|       | 06010203        |  | Saxagliptin Tablets 5 mg                                                           |
|       | 06.01.02.03.00  |  | Saxagliptin 2.5mg / Metformin 1g tablets                                           |
| ftdy. | 06010203        |  | Saxagliptin 2.5mg tablets                                                          |
|       | 06.01.02.03.00  |  | Saxagliptin 2.5mg tablets                                                          |

|       |                 |  |                                                                                            |
|-------|-----------------|--|--------------------------------------------------------------------------------------------|
| ftdz. | 06010203        |  | Saxagliptin 5mg tablets                                                                    |
|       | 06.01.02.03.00  |  | Saxagliptin 5mg tablets                                                                    |
|       | 06010203        |  | SAXAGLIPTIN TABLETS 5MG                                                                    |
|       | 06010203        |  | Sitagliptin Tablets 100 mg                                                                 |
|       | 06010203        |  | Sitagliptin Tablets 25 mg                                                                  |
|       | 06010203        |  | Sitagliptin Tablets 50 mg                                                                  |
| ft8z. | 06010203        |  | Sitagliptin 100mg tablets                                                                  |
|       | 06.01.02.03.00  |  | Sitagliptin 100mg tablets                                                                  |
| ft8x. | 06010203        |  | Sitagliptin 25mg tablets                                                                   |
|       | 06.01.02.03.00  |  | Sitagliptin 25mg tablets                                                                   |
| ft8y. | 06010203        |  | Sitagliptin 50mg tablets                                                                   |
|       | 06.01.02.03.00  |  | Sitagliptin 50mg tablets                                                                   |
|       | 06010203        |  | SITAGLIPTIN TABLETS 100 MG                                                                 |
|       | 06010203        |  | Sitagliptin TABLETS 100MG                                                                  |
|       | 06010203        |  | SITAGLIPTIN TABLETS 100MG                                                                  |
| ft8z. | 06010203        |  | SITAGLIPTIN tabs 100mg                                                                     |
|       | 06010203        |  | Sitagliptin TABS 100MG                                                                     |
|       | 06.01.02.02.00  |  | Sukkarto SR 1000mg tablets (Morningside Healthcare Ltd)                                    |
|       | 06.01.02.02.00  |  | Sukkarto SR 500mg tablets (Morningside Healthcare Ltd)                                     |
|       | 06.01.02.01.00  |  | TOLANASE tablets 250mg [PHARMACIA]                                                         |
|       | 06.01.02.01.00  |  | tolazamide tablets 100mg                                                                   |
|       | 06.01.02.01.00  |  | tolazamide tablets 250mg                                                                   |
|       | 0601021X0AAADAD |  | Tolbutamide Tablets 500 mg                                                                 |
| f3a1. | 06010201        |  | Tolbutamide 500mg tablets                                                                  |
|       | 06.01.02.01.00  |  | Tolbutamide 500mg tablets                                                                  |
|       | 06.01.02.01.00  |  | Tolbutamide 500mg tablets (Actavis UK Ltd)                                                 |
|       | 0601021X0AAADAD |  | Tolbutamide TABS 500MG                                                                     |
| f299. | 06010102        |  | Toujeo 300units/ml solution for injection 1.5ml pre-fille...                               |
|       | 06.01.01.02.00  |  | Toujeo 300units/ml solution for injection 1.5ml pre-filled SoloStar pen (Sanofi)           |
|       | 06010102        |  | Toujeo Solostar Pre-filled Disposable Pen 300 units/ml 1.5 ml pen                          |
|       | 06.01.02.03.00  |  | Trajenta 5mg tablets (Boehringer Ingelheim Ltd)                                            |
|       | 06010102        |  | Tresiba Flextouch Solution for injection 100 units/ml 3 ml pre-filled pen                  |
| f2B1. | 06010102        |  | Tresiba FlexTouch 100units/ml solution for injection 3ml ...                               |
|       | 06.01.01.02.00  |  | Tresiba FlexTouch 100units/ml solution for injection 3ml pre-filled pen (Novo Nordisk Ltd) |
|       | 06.01.01.02.00  |  | Tresiba FlexTouch 200units/ml solution for injection 3ml pre-filled pen (Novo Nordisk Ltd) |
|       | 06.01.01.02.00  |  | Tresiba Penfill 100units/ml solution for injection 3ml cartridges (Novo Nordisk Ltd)       |

|                      |                |  |                                                                                              |
|----------------------|----------------|--|----------------------------------------------------------------------------------------------|
|                      | 06.01.02.03.00 |  | Trulicity 0.75mg/0.5ml solution for injection pre-filled pen (Eli Lilly and Company Ltd)     |
| ftq7.                | 06010203       |  | Trulicity 1.5mg/0.5ml solution for injection pre-filled p...                                 |
|                      | 06.01.02.03.00 |  | Trulicity 1.5mg/0.5ml solution for injection pre-filled pen (Eli Lilly and Company Ltd)      |
|                      | 06.01.01.04.00 |  | u100 insulin syringe 0.5ml                                                                   |
|                      | 06.01.01.04.00 |  | u100 single use insulin syringe with 12mm needle(26G) 0.5ml                                  |
|                      | 06.01.01.03.00 |  | u100 single use insulin syringe with 12mm needle(26G) 1ml                                    |
|                      | 06.01.01.04.00 |  | u100 single use insulin syringe with 12mm needle(27G) 0.3ml                                  |
|                      | 06.01.01.03.00 |  | u100 single use insulin syringe with 12mm needle(28G) 0.3ml                                  |
|                      | 06.01.01.02.00 |  | Ultratard 100units/ml suspension for injection 10ml vials (Novo Nordisk Ltd)                 |
|                      | 06.01.02.01.00 |  | Vamju 30mg modified-release tablets (AMCo)                                                   |
|                      | 06.01.03.00.00 |  | Velosulin 100units/ml solution for injection 10ml vials (Novo Nordisk Ltd)                   |
|                      | 06.01.01.01.00 |  | VELOSULIN CARTRIDGE injection 100 units/ml [NOVO]                                            |
|                      | 06010203       |  | Victoza Solution for injection in pre-filled pen 6 mg/ml 3 ml pen                            |
|                      | 06.01.02.03.00 |  | Victoza 6mg/ml solution for injection 3ml pre-filled pen (Novo Nordisk Ltd)                  |
| ftc1.                | 06010203       |  | Victoza 6mg/ml solution for injection 3ml pre-filled pen ...                                 |
|                      | 06010203       |  | Victoza Prefilled Pen 3ml INJ 6MG/ML                                                         |
|                      | 06010203       |  | VICTOZA PREFILLED PEN 3ML INJ 6MG/ML                                                         |
|                      | 06010203       |  | Vildagliptin Tablets 50 mg                                                                   |
|                      | 06.01.02.03.00 |  | Vildagliptin 50mg / Metformin 1g tablets                                                     |
|                      | 06.01.02.02.00 |  | Vildagliptin 50mg / Metformin 850mg tablets                                                  |
| ftaZ.                | 06010203       |  | Vildagliptin 50mg tablets                                                                    |
|                      | 06.01.02.03.00 |  | Vildagliptin 50mg tablets                                                                    |
|                      | 06010203       |  | VILDAGLIPTIN TABLETS 50MG                                                                    |
|                      | 06010203       |  | VILDAGLIPTIN/METFORMIN TABLETS 50MG/1000MG                                                   |
|                      | 06.01.02.03.00 |  | Vipdomet 12.5mg/1000mg tablets (Takeda UK Ltd)                                               |
|                      | 06.01.02.03.00 |  | Vipidia 25mg tablets (Takeda UK Ltd)                                                         |
|                      | 06.01.01.03.00 |  | Vitrex Soft lancets 0.65mm/23gauge (Vitrex Medical Ltd)                                      |
|                      | 06010203       |  | Xultophy Solution for injection 100 units/ml + 3.6 mg/ml 3 ml pen                            |
| f2C1.                | 06010203       |  | Xultophy 100units/ml / 3.6mg/ml solution for injection 3m...                                 |
|                      | 06.01.02.03.00 |  | Xultophy 100units/ml / 3.6mg/ml solution for injection 3ml pre-filled pen (Novo Nordisk Ltd) |
|                      | 06010201       |  | Zicron Tablets 40 mg                                                                         |
|                      | 06.01.02.01.00 |  | Zicron 40mg tablets (Bristol Laboratories Ltd)                                               |
| <b>Thyroid drugs</b> |                |  |                                                                                              |

|         |                |            |                                                                         |
|---------|----------------|------------|-------------------------------------------------------------------------|
|         | 06.02.01.00.00 |            | levothyroxine capsules                                                  |
|         | 06.02.01.00.00 |            | levothyroxine lactose free oral suspension sugar-free 100microgram/5ml  |
|         | 06.02.01.00.00 |            | levothyroxine lactose free oral suspension sugar-free 25micrograms/ml   |
|         | 06.02.01.00.00 |            | levothyroxine oral liquid                                               |
|         | 06.02.01.00.00 |            | levothyroxine oral powder                                               |
|         | 06.02.01.00.00 |            | levothyroxine oral suspension 25micrograms/5ml                          |
|         | 06.02.01.00.00 |            | levothyroxine oral suspension 50micrograms/5ml                          |
| f929.00 |                | 1.075E+16  | LEVOTHYROXINE sf oral soln 100microgram/5ml                             |
| f927.00 |                | 1.075E+16  | LEVOTHYROXINE sf oral soln 25micrograms/5ml                             |
| f928.00 |                | 1.075E+16  | LEVOTHYROXINE sf oral soln 50micrograms/5ml                             |
|         | 60201          |            | Levothyroxine Sodium Oral solution Sugar Free 100 micrograms/5 ml       |
|         | 60201          |            | Levothyroxine Sodium Suspension 100 micrograms/5 ml                     |
| f923.00 |                | 374296008  | Levothyroxine Sodium Tablets 100 micrograms                             |
|         | 60201          |            | Levothyroxine Sodium Tablets 100 micrograms                             |
| f923.00 |                | 374296008  | Levothyroxine Sodium Tablets 100 micrograms~(f923.)                     |
| f921.00 |                | 374294006  | Levothyroxine Sodium Tablets 25 micrograms                              |
|         | 60201          |            | Levothyroxine Sodium Tablets 25 micrograms                              |
| f922.00 |                | 374295007  | Levothyroxine Sodium Tablets 50 micrograms                              |
|         | 60201          |            | Levothyroxine Sodium Tablets 50 micrograms                              |
| f92..00 |                | 424608008  | Levothyroxine sodium 100microgram capsules                              |
|         | 06.02.01.00.00 |            | Levothyroxine sodium 100microgram capsules                              |
| f92..00 |                | 8.8164E+15 | Levothyroxine sodium 100microgram oral powder sachets                   |
| f923.   | 6020100        |            | Levothyroxine sodium 100microgram tablets                               |
| f923.00 |                | 374296008  | Levothyroxine sodium 100microgram tablets                               |
|         | 06.02.01.00.00 |            | Levothyroxine sodium 100microgram tablets                               |
|         | 06.02.01.00.00 |            | Levothyroxine sodium 100microgram tablets (A A H Pharmaceuticals Ltd)   |
|         | 06.02.01.00.00 |            | Levothyroxine sodium 100microgram tablets (Actavis UK Ltd)              |
|         | 06.02.01.00.00 |            | Levothyroxine sodium 100microgram tablets (Almus Pharmaceuticals Ltd)   |
|         | 06.02.01.00.00 |            | Levothyroxine sodium 100microgram tablets (IVAX Pharmaceuticals UK Ltd) |
|         |                | 2.1031E+14 | Levothyroxine sodium 100microgram tablets (IVAX Pharmaceuticals UK Ltd) |
|         | 06.02.01.00.00 |            | Levothyroxine sodium 100microgram tablets (Mylan Ltd)                   |
|         | 06.02.01.00.00 |            | Levothyroxine sodium 100microgram tablets (Teva UK Ltd)                 |
|         |                | 9.0201E+14 | Levothyroxine sodium 100microgram tablets (Teva UK Ltd)                 |
| f929.   | 6020100        |            | Levothyroxine sodium 100micrograms/5ml oral solution suga...            |

|         |                |            |                                                                                             |
|---------|----------------|------------|---------------------------------------------------------------------------------------------|
| f929.00 |                | 1.075E+16  | Levothyroxine sodium 100micrograms/5ml oral solution sugar free                             |
|         | 06.02.01.00.00 |            | Levothyroxine sodium 100micrograms/5ml oral solution sugar free                             |
|         | 06.02.01.00.00 |            | Levothyroxine sodium 100micrograms/5ml oral solution sugar free (A A H Pharmaceuticals Ltd) |
|         | 06.02.01.00.00 |            | Levothyroxine sodium 100micrograms/5ml oral solution sugar free (Teva UK Ltd)               |
| f92..   | 6020100        |            | Levothyroxine sodium 12.5microgram tablets                                                  |
| f92..00 |                | 3.362E+16  | Levothyroxine sodium 12.5microgram tablets                                                  |
|         | 06.02.01.00.00 |            | Levothyroxine sodium 250micrograms/5ml oral solution                                        |
|         | 06.02.01.00.00 |            | Levothyroxine sodium 250micrograms/5ml oral suspension                                      |
| f92..   | 6020100        |            | Levothyroxine sodium 25microgram capsules                                                   |
| f92..00 |                | 424458007  | Levothyroxine sodium 25microgram capsules                                                   |
|         | 06.02.01.00.00 |            | Levothyroxine sodium 25microgram capsules                                                   |
| f921.   | 6020100        |            | Levothyroxine sodium 25microgram tablets                                                    |
| f921.00 |                | 374294006  | Levothyroxine sodium 25microgram tablets                                                    |
|         | 06.02.01.00.00 |            | Levothyroxine sodium 25microgram tablets                                                    |
|         | 06.02.01.00.00 |            | Levothyroxine sodium 25microgram tablets (A A H Pharmaceuticals Ltd)                        |
|         | 06.02.01.00.00 |            | Levothyroxine sodium 25microgram tablets (Actavis UK Ltd)                                   |
|         |                | 4.8011E+13 | Levothyroxine sodium 25microgram tablets (Actavis UK Ltd)                                   |
|         | 06.02.01.00.00 |            | Levothyroxine sodium 25microgram tablets (AMCo)                                             |
|         | 06.02.01.00.00 |            | Levothyroxine sodium 25microgram tablets (IVAX Pharmaceuticals UK Ltd)                      |
|         | 06.02.01.00.00 |            | Levothyroxine sodium 25microgram tablets (Teva UK Ltd)                                      |
|         | 06.02.01.00.00 |            | Levothyroxine sodium 25microgram tablets (Wockhardt UK Ltd)                                 |
| f927.00 |                | 1.075E+16  | Levothyroxine sodium 25micrograms/5ml oral solution sugar free                              |
|         | 06.02.01.00.00 |            | Levothyroxine sodium 25micrograms/5ml oral solution sugar free                              |
| f927.00 |                | 1.075E+16  | Levothyroxine sodium 25micrograms/5ml oral solution sugar...                                |
|         | 06.02.01.00.00 |            | Levothyroxine sodium 38microgram / Liothyronine 9microgram tablets                          |
| f92..00 |                | 424293002  | Levothyroxine sodium 50microgram capsules                                                   |
|         | 06.02.01.00.00 |            | Levothyroxine sodium 50microgram capsules                                                   |
| f922.   | 6020100        |            | Levothyroxine sodium 50microgram tablets                                                    |
| f922.00 |                | 374295007  | Levothyroxine sodium 50microgram tablets                                                    |
|         | 60201          |            | Levothyroxine sodium 50microgram tablets                                                    |
|         | 06.02.01.00.00 |            | Levothyroxine sodium 50microgram tablets                                                    |
|         | 06.02.01.00.00 |            | Levothyroxine sodium 50microgram tablets (A A H Pharmaceuticals Ltd)                        |



|         |                 |            |                                                                      |
|---------|-----------------|------------|----------------------------------------------------------------------|
|         | 06.02.01.00.00  |            | Levothyroxine sodium 50microgram tablets (Actavis UK Ltd)            |
| f922.00 |                 | 9.8095E+15 | Levothyroxine sodium 50microgram tablets (Almus Pharmaceu...         |
|         | 06.02.01.00.00  |            | Levothyroxine sodium 50microgram tablets (Almus Pharmaceuticals Ltd) |
|         | 06.02.01.00.00  |            | Levothyroxine sodium 50microgram tablets (Mylan Ltd)                 |
|         | 06.02.01.00.00  |            | Levothyroxine sodium 50microgram tablets (Sigma Pharmaceuticals Plc) |
| f922.00 |                 | 8.3011E+13 | Levothyroxine sodium 50microgram tablets (Teva UK Ltd)               |
|         | 06.02.01.00.00  |            | Levothyroxine sodium 50microgram tablets (Teva UK Ltd)               |
|         |                 | 8.3011E+13 | Levothyroxine sodium 50microgram tablets (Teva UK Ltd)               |
| f928.00 |                 | 1.075E+16  | Levothyroxine sodium 50micrograms/5ml oral solution sugar free       |
|         | 06.02.01.00.00  |            | Levothyroxine sodium 50micrograms/5ml oral solution sugar free       |
| f92..   | 6020100         |            | Levothyroxine sodium 75microgram tablets                             |
| f92..00 |                 | 376988009  | Levothyroxine sodium 75microgram tablets                             |
|         | 60201           |            | LEVOTHYROXINE SODIUM NON TARIFF TABLETS 100MICROGRAMS                |
|         | 60201           |            | Levothyroxine Sodium Non Tariff TABS 25MICROGRAMS                    |
|         | 60201           |            | Levothyroxine Sodium Sf Oral SOLN 25MCG/5ML                          |
| f923.00 |                 | 374296008  | Levothyroxine Sodium Tablets 100 micrograms                          |
| f923.00 |                 | 374296008  | Levothyroxine Sodium Tablets 100micrograms                           |
|         | 60201           |            | Levothyroxine Sodium TABLETS 100MICROGRAMS                           |
|         | 60201           |            | LEVOTHYROXINE SODIUM TABLETS 100MICROGRAMS                           |
| f921.00 |                 | 374294006  | Levothyroxine Sodium Tablets 25 micrograms                           |
|         | 60201           |            | Levothyroxine Sodium TABLETS 25MICROGRAMS                            |
|         | 60201           |            | LEVOTHYROXINE SODIUM TABLETS 25MICROGRAMS                            |
| f922.00 |                 | 374295007  | Levothyroxine Sodium Tablets 50 micrograms                           |
|         | 60201           |            | Levothyroxine Sodium TABLETS 50MICROGRAMS                            |
|         | 60201           |            | LEVOTHYROXINE SODIUM TABLETS 50MICROGRAMS                            |
|         | 60201           |            | Levothyroxine Sodium TABS 100MICROGRAMS                              |
|         | 60201           |            | Levothyroxine Sodium TABS 25MICROGRAMS                               |
|         | 60201           |            | Levothyroxine Sodium TABS 50MICROGRAMS                               |
| f929.00 |                 | 1.075E+16  | levothyroxine sugar free oral solution 100microgram/5ml              |
| f927.00 |                 | 1.075E+16  | levothyroxine sugar free oral solution 25micrograms/5ml              |
| f923.00 |                 | 374296008  | levothyroxine tablets 100micrograms                                  |
| f923.00 |                 | 374296008  | Levothyroxine tablets 100micrograms                                  |
| f921.00 |                 | 374294006  | levothyroxine tablets 25micrograms                                   |
| f921.00 |                 | 374294006  | Levothyroxine tablets 25micrograms                                   |
| f921.00 |                 | 374294006  | LEVOTHYROXINE tablets 25micrograms                                   |
|         | 0602010V0AABWBW |            | LEVOTHYROXINE TABLETS 25MICROGRAMS                                   |
| f922.00 |                 | 374295007  | levothyroxine tablets 50micrograms                                   |

|                                |                 |                                                      |                                              |
|--------------------------------|-----------------|------------------------------------------------------|----------------------------------------------|
| f922.00                        |                 | 374295007                                            | Levothyroxine tablets 50micrograms           |
| f922.00                        |                 | 374295007                                            | LEVOTHYROXINE tablets 50micrograms           |
|                                | 60201           |                                                      | LEVOTHYROXINE TABLETS 50MICROGRAMS           |
|                                |                 | 2.9928E+17                                           | LEVOTHYROXINE tablets 50micrograms           |
| f923.                          | 6020100         |                                                      | LEVOTHYROXINE tabs 100micrograms             |
| f923.00                        |                 | 374296008                                            | LEVOTHYROXINE tabs 100micrograms             |
|                                |                 | 9.0201E+14                                           | LEVOTHYROXINE tabs 100micrograms [APS]       |
|                                |                 | 2.1031E+14                                           | LEVOTHYROXINE tabs 100micrograms [IVAX]      |
|                                |                 | 9.0201E+14                                           | LEVOTHYROXINE tabs 100micrograms [TEVA]      |
| f921.                          | 6020100         |                                                      | LEVOTHYROXINE tabs 25micrograms              |
| f921.00                        |                 | 374294006                                            | LEVOTHYROXINE tabs 25micrograms              |
|                                |                 | 4.8011E+13                                           | LEVOTHYROXINE tabs 25micrograms [ACTAVIS]    |
|                                |                 | 4.8011E+13                                           | LEVOTHYROXINE tabs 25micrograms [ALPHAR/COX] |
| f922.                          | 6020100         |                                                      | LEVOTHYROXINE tabs 50micrograms              |
| f922.00                        |                 | 374295007                                            | LEVOTHYROXINE tabs 50micrograms              |
|                                |                 | 8.3011E+13                                           | LEVOTHYROXINE tabs 50micrograms [APS]        |
|                                |                 | 8.3011E+13                                           | LEVOTHYROXINE tabs 50micrograms [TEVA]       |
| <b>Rhythm and rate-control</b> |                 |                                                      |                                              |
| Read2                          | 0203020D0AAAAAA |                                                      | AMIODARONE                                   |
|                                | 0203020D0AAABAB |                                                      | AMIODARONE                                   |
|                                | 2030201         |                                                      | AMIODARONE                                   |
|                                |                 | Amiodarone 100mg tablets                             | AMIODARONE                                   |
|                                |                 | Amiodarone 100mg tablets (Actavis UK Ltd)            | AMIODARONE                                   |
|                                |                 | Amiodarone 100mg tablets (Teva UK Ltd)               | AMIODARONE                                   |
|                                |                 | Amiodarone 200mg tablets                             | AMIODARONE                                   |
|                                |                 | Amiodarone 200mg tablets (A A H Pharmaceuticals Ltd) | AMIODARONE                                   |
|                                |                 | Amiodarone 200mg tablets (Actavis UK Ltd)            | AMIODARONE                                   |
|                                |                 | Amiodarone 200mg tablets (Teva UK Ltd)               | AMIODARONE                                   |
|                                |                 | Cordarone X 200 tablets (Sanofi)                     | AMIODARONE                                   |
|                                | 02.08.02.00.00  |                                                      | APIXABAN                                     |
|                                | 20802           |                                                      | APIXABAN                                     |
|                                | 2080200         |                                                      | APIXABAN                                     |
|                                | 02.02.01.00.00  |                                                      | BISOPROLOL                                   |
|                                | 0204000H0AAAAAA |                                                      | BISOPROLOL                                   |

|  |                 |                                                       |            |
|--|-----------------|-------------------------------------------------------|------------|
|  | 0204000H0AAABAB |                                                       | BISOPROLOL |
|  | 0204000H0BCABAB |                                                       | BISOPROLOL |
|  | 204             |                                                       | BISOPROLOL |
|  | 2040000         |                                                       | BISOPROLOL |
|  |                 | Bisoprolol 5mg tablets                                | BISOPROLOL |
|  |                 | Bisoprolol Fumarate Tablets 5mg                       | BISOPROLOL |
|  |                 | BISOPROLOL tabs 5mg                                   | BISOPROLOL |
|  |                 | Bisoprolol 10mg tablets                               | BISOPROLOL |
|  |                 | BISOPROLOL tabs 10mg                                  | BISOPROLOL |
|  |                 | Cardicor 2.5mg tablets (Merck Serono Ltd)             | BISOPROLOL |
|  |                 | Bisoprolol 1.25mg tablets                             | BISOPROLOL |
|  |                 | BISOPROLOL tabs 1.25mg                                | BISOPROLOL |
|  |                 | Bisoprolol 2.5mg tablets                              | BISOPROLOL |
|  |                 | BISOPROLOL tabs 2.5mg                                 | BISOPROLOL |
|  |                 | Bisoprolol 3.75mg tablets                             | BISOPROLOL |
|  |                 | Bisoprolol 7.5mg tablets                              | BISOPROLOL |
|  |                 | Bisoprolol 10mg tablets                               | BISOPROLOL |
|  |                 | Bisoprolol 10mg tablets (A A H Pharmaceuticals Ltd)   | BISOPROLOL |
|  |                 | Bisoprolol 10mg tablets (Actavis UK Ltd)              | BISOPROLOL |
|  |                 | Bisoprolol 10mg tablets (Almus Pharmaceuticals Ltd)   | BISOPROLOL |
|  |                 | Bisoprolol 10mg tablets (Mylan Ltd)                   | BISOPROLOL |
|  |                 | Bisoprolol 10mg tablets (Niche Generics Ltd)          | BISOPROLOL |
|  |                 | Bisoprolol 10mg tablets (Teva UK Ltd)                 | BISOPROLOL |
|  |                 | Bisoprolol 1.25mg tablets                             | BISOPROLOL |
|  |                 | Bisoprolol 1.25mg tablets (A A H Pharmaceuticals Ltd) | BISOPROLOL |

|  |  |                                                       |            |
|--|--|-------------------------------------------------------|------------|
|  |  | Bisoprolol 1.25mg tablets (Almus Pharmaceuticals Ltd) | BISOPROLOL |
|  |  | Bisoprolol 1.25mg tablets (Mylan Ltd)                 | BISOPROLOL |
|  |  | Bisoprolol 1.25mg tablets (Teva UK Ltd)               | BISOPROLOL |
|  |  | Bisoprolol 2.5mg/5ml oral suspension                  | BISOPROLOL |
|  |  | Bisoprolol 2.5mg tablets                              | BISOPROLOL |
|  |  | Bisoprolol 2.5mg tablets (A A H Pharmaceuticals Ltd)  | BISOPROLOL |
|  |  | Bisoprolol 2.5mg tablets (Actavis UK Ltd)             | BISOPROLOL |
|  |  | Bisoprolol 2.5mg tablets (Almus Pharmaceuticals Ltd)  | BISOPROLOL |
|  |  | Bisoprolol 2.5mg tablets (Mylan Ltd)                  | BISOPROLOL |
|  |  | Bisoprolol 2.5mg tablets (Teva UK Ltd)                | BISOPROLOL |
|  |  | Bisoprolol 3.75mg tablets                             | BISOPROLOL |
|  |  | Bisoprolol 3.75mg tablets (A A H Pharmaceuticals Ltd) | BISOPROLOL |
|  |  | Bisoprolol 3.75mg tablets (Almus Pharmaceuticals Ltd) | BISOPROLOL |
|  |  | Bisoprolol 3.75mg tablets (Teva UK Ltd)               | BISOPROLOL |
|  |  | Bisoprolol 5mg/5ml oral suspension                    | BISOPROLOL |
|  |  | Bisoprolol 5mg tablets                                | BISOPROLOL |
|  |  | Bisoprolol 5mg tablets (A A H Pharmaceuticals Ltd)    | BISOPROLOL |
|  |  | Bisoprolol 5mg tablets (Actavis UK Ltd)               | BISOPROLOL |
|  |  | Bisoprolol 5mg tablets (C P Pharmaceuticals Ltd)      | BISOPROLOL |
|  |  | Bisoprolol 5mg tablets (Kent Pharmaceuticals Ltd)     | BISOPROLOL |
|  |  | Bisoprolol 5mg tablets (Ranbaxy (UK) Ltd)             | BISOPROLOL |

|  |                  |                                                      |            |
|--|------------------|------------------------------------------------------|------------|
|  |                  | Bisoprolol 5mg tablets (Sandoz Ltd)                  | BISOPROLOL |
|  |                  | Bisoprolol 5mg tablets (Teva UK Ltd)                 | BISOPROLOL |
|  |                  | Bisoprolol 7.5mg tablets                             | BISOPROLOL |
|  |                  | Bisoprolol 7.5mg tablets (A A H Pharmaceuticals Ltd) | BISOPROLOL |
|  |                  | Bisoprolol 7.5mg tablets (Almus Pharmaceuticals Ltd) | BISOPROLOL |
|  |                  | Cardicor 10mg tablets (Merck Serono Ltd)             | BISOPROLOL |
|  |                  | Cardicor 1.25mg tablets (Merck Serono Ltd)           | BISOPROLOL |
|  |                  | Cardicor 2.5mg tablets (Merck Serono Ltd)            | BISOPROLOL |
|  |                  | Cardicor 3.75mg tablets (Merck Serono Ltd)           | BISOPROLOL |
|  |                  | Cardicor 5mg tablets (Merck Serono Ltd)              | BISOPROLOL |
|  |                  | Cardicor 7.5mg tablets (Merck Serono Ltd)            | BISOPROLOL |
|  |                  | Monocor 10mg tablets (Wyeth Pharmaceuticals)         | BISOPROLOL |
|  |                  | Monocor 5mg tablets (Wyeth Pharmaceuticals)          | BISOPROLOL |
|  | 020400080AAABAB  |                                                      | CARVEDILOL |
|  | 020400080AAACAC  |                                                      | CARVEDILOL |
|  | 020400080AAAEAE  |                                                      | CARVEDILOL |
|  | 020400080AAAF AF |                                                      | CARVEDILOL |
|  | 2040000          |                                                      | CARVEDILOL |
|  |                  | Carvedilol 12.5mg tablets                            | CARVEDILOL |
|  |                  | Carvedilol 25mg tablets                              | CARVEDILOL |
|  |                  | Carvedilol 3.125mg tablets                           | CARVEDILOL |
|  |                  | Carvedilol 6.25mg tablets                            | CARVEDILOL |
|  |                  | Carvedilol 12.5mg tablets                            | CARVEDILOL |

|  |                 |                                                        |             |
|--|-----------------|--------------------------------------------------------|-------------|
|  |                 | Carvedilol 12.5mg tablets (Almus Pharmaceuticals Ltd)  | CARVEDILOL  |
|  |                 | Carvedilol 12.5mg tablets (Teva UK Ltd)                | CARVEDILOL  |
|  |                 | Carvedilol 25mg tablets                                | CARVEDILOL  |
|  |                 | Carvedilol 3.125mg tablets                             | CARVEDILOL  |
|  |                 | Carvedilol 3.125mg tablets (A A H Pharmaceuticals Ltd) | CARVEDILOL  |
|  |                 | Carvedilol 6.25mg tablets                              | CARVEDILOL  |
|  |                 | Eucardic 12.5mg tablets (Roche Products Ltd)           | CARVEDILOL  |
|  |                 | Eucardic 25mg tablets (Roche Products Ltd)             | CARVEDILOL  |
|  | 02.08.02.00.00  |                                                        | DABIGATRAN  |
|  | 20802           |                                                        | DABIGATRAN  |
|  | 2080200         |                                                        | DABIGATRAN  |
|  | 02.01.01.00.00  |                                                        | DIGITOXIN   |
|  | 02.01.01.00.00  |                                                        | DIGOXIN     |
|  | 0201010F0AAAAAA |                                                        | DIGOXIN     |
|  | 0201010F0AADAD  |                                                        | DIGOXIN     |
|  | 0201010F0AAAEAE |                                                        | DIGOXIN     |
|  | 0201010F0AAAFAF |                                                        | DIGOXIN     |
|  | 2010100         |                                                        | DIGOXIN     |
|  | 02.06.02.00.00  |                                                        | DILTIAZEM   |
|  | 0206020C0AAAAAA |                                                        | DILTIAZEM   |
|  | 0206020C0AAACAC |                                                        | DILTIAZEM   |
|  | 0206020C0AAAEAE |                                                        | DILTIAZEM   |
|  | 0206020C0AAAJAJ |                                                        | DILTIAZEM   |
|  | 0206020C0AAASAS |                                                        | DILTIAZEM   |
|  | 0206020C0AAATAT |                                                        | DILTIAZEM   |
|  | 0206020C0AAAUAU |                                                        | DILTIAZEM   |
|  | 0206020C0AAAVAV |                                                        | DILTIAZEM   |
|  | 0206020C0AAAXAX |                                                        | DILTIAZEM   |
|  | 0206020C0AAAYAY |                                                        | DILTIAZEM   |
|  | 2060200         |                                                        | DILTIAZEM   |
|  | 20302           |                                                        | DRONEDARONE |
|  | 2030202         |                                                        | DRONEDARONE |
|  |                 | Dronedarone 400mg tablets                              | DRONEDARONE |

|  |                 |                                                             |             |
|--|-----------------|-------------------------------------------------------------|-------------|
|  |                 | DRONEDARONE tabs<br>400mg                                   | DRONEDARONE |
|  | 02.08.02.00.00  |                                                             | EDOXABAN    |
|  | 0203020I0AAADAD |                                                             | FLECAINIDE  |
|  | 0203020I0AAAKAK |                                                             | FLECAINIDE  |
|  | 2030200         |                                                             | FLECAINIDE  |
|  | 2030201         |                                                             | FLECAINIDE  |
|  |                 | Flecainide 100mg<br>tablets                                 | FLECAINIDE  |
|  |                 | Flecainide 100mg<br>tablets (A A H<br>Pharmaceuticals Ltd)  | FLECAINIDE  |
|  |                 | Flecainide 100mg<br>tablets (Almus<br>Pharmaceuticals Ltd)  | FLECAINIDE  |
|  |                 | Flecainide 100mg<br>tablets (Mylan Ltd)                     | FLECAINIDE  |
|  |                 | Flecainide 100mg<br>tablets (Zentiva)                       | FLECAINIDE  |
|  |                 | Flecainide 200mg<br>modified-release<br>capsules            | FLECAINIDE  |
|  |                 | Flecainide 25mg/5ml<br>oral suspension                      | FLECAINIDE  |
|  |                 | Flecainide 50mg<br>tablets                                  | FLECAINIDE  |
|  |                 | Flecainide 50mg<br>tablets (A A H<br>Pharmaceuticals Ltd)   | FLECAINIDE  |
|  |                 | Flecainide 50mg<br>tablets (Actavis UK<br>Ltd)              | FLECAINIDE  |
|  |                 | Flecainide 50mg<br>tablets (Almus<br>Pharmaceuticals Ltd)   | FLECAINIDE  |
|  |                 | Flecainide 50mg<br>tablets (Mylan Ltd)                      | FLECAINIDE  |
|  |                 | Flecainide 50mg<br>tablets (Teva UK Ltd)                    | FLECAINIDE  |
|  |                 | Tambocor 100mg<br>tablets (Meda<br>Pharmaceuticals Ltd)     | FLECAINIDE  |
|  |                 | Tambocor 50mg<br>tablets (Meda<br>Pharmaceuticals Ltd)      | FLECAINIDE  |
|  |                 | Tambocor XL 200mg<br>capsules (Meda<br>Pharmaceuticals Ltd) | FLECAINIDE  |
|  | 0204000K0AAABAB |                                                             | METOPROLOL  |
|  | 0204000K0AAACAC |                                                             | METOPROLOL  |

|  |                 |                                                           |            |
|--|-----------------|-----------------------------------------------------------|------------|
|  | 0204000K0AAADAD |                                                           | METOPROLOL |
|  | 2040000         |                                                           | METOPROLOL |
|  |                 | Betaloc 100mg tablets (AstraZeneca UK Ltd)                | METOPROLOL |
|  |                 | Betaloc 50mg tablets (AstraZeneca UK Ltd)                 | METOPROLOL |
|  |                 | Betaloc-SA 200mg tablets (AstraZeneca UK Ltd)             | METOPROLOL |
|  |                 | Lopresor SR 200mg tablets (Recordati Pharmaceuticals Ltd) | METOPROLOL |
|  |                 | LOPRESOR tablets 100mg [NOVARTIS]                         | METOPROLOL |
|  |                 | LOPRESOR tablets 50mg [NOVARTIS]                          | METOPROLOL |
|  |                 | Metoprolol 100mg / Hydrochlorothiazide 12.5mg tablets     | METOPROLOL |
|  |                 | Metoprolol 100mg tablets                                  | METOPROLOL |
|  |                 | Metoprolol 100mg tablets (Mylan Ltd)                      | METOPROLOL |
|  |                 | Metoprolol 100mg tablets (Sandoz Ltd)                     | METOPROLOL |
|  |                 | Metoprolol 200mg modified-release tablets                 | METOPROLOL |
|  |                 | Metoprolol 50mg tablets                                   | METOPROLOL |
|  |                 | Metoprolol 50mg tablets (A A H Pharmaceuticals Ltd)       | METOPROLOL |
|  |                 | Metoprolol 50mg tablets (Actavis UK Ltd)                  | METOPROLOL |
|  |                 | Metoprolol 50mg tablets (Almus Pharmaceuticals Ltd)       | METOPROLOL |
|  |                 | Metoprolol 50mg tablets (Mylan Ltd)                       | METOPROLOL |
|  |                 | Metoprolol 50mg tablets (Sandoz Ltd)                      | METOPROLOL |
|  |                 | Metoprolol 50mg tablets (Teva UK Ltd)                     | METOPROLOL |
|  |                 | Metoprolol 5mg/5ml solution for injection ampoules        | METOPROLOL |
|  | 204             |                                                           | NEBIVOLOL  |
|  | 2040000         |                                                           | NEBIVOLOL  |



|  |                 |                                                                   |             |
|--|-----------------|-------------------------------------------------------------------|-------------|
|  |                 | Nebivolol 2.5mg tablets                                           | NEBIVOLOL   |
|  |                 | Nebivolol 5mg tablets                                             | NEBIVOLOL   |
|  |                 | Nebilet 5mg tablets (A. Menarini Farmaceutica Internazionale SRL) | NEBIVOLOL   |
|  |                 | Nebivolol 10mg tablets                                            | NEBIVOLOL   |
|  |                 | Nebivolol 2.5mg tablets                                           | NEBIVOLOL   |
|  |                 | Nebivolol 2.5mg tablets (A A H Pharmaceuticals Ltd)               | NEBIVOLOL   |
|  |                 | Nebivolol 5mg tablets                                             | NEBIVOLOL   |
|  |                 | Nebivolol 5mg tablets (Actavis UK Ltd)                            | NEBIVOLOL   |
|  |                 | Nebivolol 5mg tablets (Teva UK Ltd)                               | NEBIVOLOL   |
|  |                 | Nebivolol 5mg tablets (Zentiva)                                   | NEBIVOLOL   |
|  | 0203020R0AAAAAA |                                                                   | PROPAFENONE |
|  | 0203020R0AAABAB |                                                                   | PROPAFENONE |
|  | 2030201         |                                                                   | PROPAFENONE |
|  |                 | Arythmol 150mg tablets (BGP Products Ltd)                         | PROPAFENONE |
|  |                 | Propafenone 150mg tablets                                         | PROPAFENONE |
|  |                 | Propafenone 300mg tablets                                         | PROPAFENONE |
|  | 02.08.02.00.00  |                                                                   | RIVAROXABAN |
|  | 20802           |                                                                   | RIVAROXABAN |
|  | 2080200         |                                                                   | RIVAROXABAN |
|  | 0204000T0AAABAB |                                                                   | SOTALOL     |
|  | 0204000T0AAACAC |                                                                   | SOTALOL     |
|  | 0204000T0AAAEAE |                                                                   | SOTALOL     |
|  | 2040000         |                                                                   | SOTALOL     |
|  |                 | Sotalol 40mg tablets                                              | SOTALOL     |
|  |                 | Sotalol 80mg tablets                                              | SOTALOL     |
|  |                 | Sotacor 160mg tablets (Bristol-Myers Squibb Pharmaceuticals Ltd)  | SOTALOL     |
|  |                 | Sotacor 80mg tablets (Bristol-Myers Squibb Pharmaceuticals Ltd)   | SOTALOL     |
|  |                 | Sotalol 40mg tablets                                              | SOTALOL     |

|  |  |                                                                           |         |
|--|--|---------------------------------------------------------------------------|---------|
|  |  | Sotalol 40mg tablets<br>(A A H<br>Pharmaceuticals Ltd)                    | SOTALOL |
|  |  | Sotalol 40mg tablets<br>(Teva UK Ltd)                                     | SOTALOL |
|  |  | Sotalol 40mg tablets<br>(Tillomed<br>Laboratories Ltd)                    | SOTALOL |
|  |  | Sotalol 80mg tablets<br>(Sandoz Ltd)                                      | SOTALOL |
|  |  | SOTAZIDE tablets<br>[BRISTOL]                                             | SOTALOL |
|  |  | Beta-Cardone 200mg<br>tablets (Focus<br>Pharmaceuticals Ltd)              | SOTALOL |
|  |  | Beta-Cardone 40mg<br>tablets (Focus<br>Pharmaceuticals Ltd)               | SOTALOL |
|  |  | Beta-Cardone 80mg<br>tablets (Focus<br>Pharmaceuticals Ltd)               | SOTALOL |
|  |  | Sotalol 160mg tablets                                                     | SOTALOL |
|  |  | Sotalol 200mg tablets                                                     | SOTALOL |
|  |  | Sotalol 80mg tablets                                                      | SOTALOL |
|  |  | Sotalol 80mg tablets<br>(A A H<br>Pharmaceuticals Ltd)                    | SOTALOL |
|  |  | Sotalol 80mg tablets<br>(Teva UK Ltd)                                     | SOTALOL |
|  |  | Sotalol 40mg tablets                                                      | SOTALOL |
|  |  | Sotalol 80mg tablets                                                      | SOTALOL |
|  |  | Sotacor 160mg<br>tablets (Bristol-Myers<br>Squibb<br>Pharmaceuticals Ltd) | SOTALOL |
|  |  | Sotacor 80mg tablets<br>(Bristol-Myers Squibb<br>Pharmaceuticals Ltd)     | SOTALOL |
|  |  | Sotalol 40mg tablets                                                      | SOTALOL |
|  |  | Sotalol 40mg tablets<br>(A A H<br>Pharmaceuticals Ltd)                    | SOTALOL |
|  |  | Sotalol 40mg tablets<br>(Teva UK Ltd)                                     | SOTALOL |
|  |  | Sotalol 40mg tablets<br>(Tillomed<br>Laboratories Ltd)                    | SOTALOL |
|  |  | Sotalol 80mg tablets<br>(Sandoz Ltd)                                      | SOTALOL |

|  |                  |                                                                  |           |
|--|------------------|------------------------------------------------------------------|-----------|
|  |                  | SOTAZIDE tablets<br>[BRISTOL]                                    | SOTALOL   |
|  |                  | Beta-Cardone 200mg<br>tablets (Focus<br>Pharmaceuticals Ltd)     | SOTALOL   |
|  |                  | Beta-Cardone 40mg<br>tablets (Focus<br>Pharmaceuticals Ltd)      | SOTALOL   |
|  |                  | Beta-Cardone 80mg<br>tablets (Focus<br>Pharmaceuticals Ltd)      | SOTALOL   |
|  |                  | Sotalol 160mg tablets                                            | SOTALOL   |
|  |                  | Sotalol 200mg tablets                                            | SOTALOL   |
|  |                  | Sotalol 80mg tablets                                             | SOTALOL   |
|  |                  | Sotalol 80mg tablets<br>(A A H<br>Pharmaceuticals Ltd)           | SOTALOL   |
|  |                  | Sotalol 80mg tablets<br>(Teva UK Ltd)                            | SOTALOL   |
|  | 02.06.02.00.00   |                                                                  | VERAPAMIL |
|  | 0206020T0AAACAC  |                                                                  | VERAPAMIL |
|  | 0206020T0AAADAD  |                                                                  | VERAPAMIL |
|  | 0206020T0AAAF AF |                                                                  | VERAPAMIL |
|  | 0206020T0AAAGAG  |                                                                  | VERAPAMIL |
|  | 0206020T0AAAH AH |                                                                  | VERAPAMIL |
|  | 0206020T0AAAI AI |                                                                  | VERAPAMIL |
|  | 0206020T0AAAJ AJ |                                                                  | VERAPAMIL |
|  | 0206020T0AAAK AK |                                                                  | VERAPAMIL |
|  | 0206020T0AAAU AU |                                                                  | VERAPAMIL |
|  | 2030202          |                                                                  | VERAPAMIL |
|  | 2060200          |                                                                  | VERAPAMIL |
|  |                  | Verapamil 40mg<br>tablets                                        | VERAPAMIL |
|  |                  | Verapamil 80mg<br>tablets                                        | VERAPAMIL |
|  |                  | Verapamil 120mg<br>tablets                                       | VERAPAMIL |
|  |                  | Verapamil 240mg<br>modified-release<br>tablets                   | VERAPAMIL |
|  |                  | Half Securon SR<br>120mg tablets<br>(Abbott Laboratories<br>Ltd) | VERAPAMIL |
|  |                  | Half Securon SR<br>120mg tablets (BGP<br>Products Ltd)           | VERAPAMIL |

|  |  |                                                                      |           |
|--|--|----------------------------------------------------------------------|-----------|
|  |  | Securon SR 240mg tablets (Abbott Laboratories Ltd)                   | VERAPAMIL |
|  |  | Securon SR 240mg tablets (BGP Products Ltd)                          | VERAPAMIL |
|  |  | SECURON SR tabs 240mg                                                | VERAPAMIL |
|  |  | Univer 180mg modified-release capsules (Teva UK Ltd)                 | VERAPAMIL |
|  |  | VERAPAMIL HCl tabs 160mg                                             | VERAPAMIL |
|  |  | Verapamil 240mg modified-release capsules                            | VERAPAMIL |
|  |  | Cordilox 120mg tablets (IVAX Pharmaceuticals UK Ltd)                 | VERAPAMIL |
|  |  | Securon 120mg tablets (Abbott Laboratories Ltd)                      | VERAPAMIL |
|  |  | Securon SR 240mg tablets (BGP Products Ltd)                          | VERAPAMIL |
|  |  | SECURON tablets 80mg [ABBOTT]                                        | VERAPAMIL |
|  |  | Univer 120mg modified-release capsules (Teva UK Ltd)                 | VERAPAMIL |
|  |  | Univer 180mg modified-release capsules (Teva UK Ltd)                 | VERAPAMIL |
|  |  | Univer 240mg modified-release capsules (Teva UK Ltd)                 | VERAPAMIL |
|  |  | Verapamil 120mg modified-release tablets (A A H Pharmaceuticals Ltd) | VERAPAMIL |
|  |  | Verapamil 120mg tablets                                              | VERAPAMIL |
|  |  | Verapamil 120mg tablets (A A H Pharmaceuticals Ltd)                  | VERAPAMIL |
|  |  | Verapamil 120mg tablets (Actavis UK Ltd)                             | VERAPAMIL |
|  |  | Verapamil 160mg tablets (A A H Pharmaceuticals Ltd)                  | VERAPAMIL |

|  |  |                                                        |           |
|--|--|--------------------------------------------------------|-----------|
|  |  | Verapamil 240mg modified-release capsules              | VERAPAMIL |
|  |  | Verapamil 240mg modified-release tablets               | VERAPAMIL |
|  |  | Verapamil 240mg modified-release tablets (Teva UK Ltd) | VERAPAMIL |
|  |  | Verapamil 40mg/5ml oral solution sugar free            | VERAPAMIL |
|  |  | Verapamil 40mg tablets                                 | VERAPAMIL |
|  |  | Verapamil 40mg tablets (Actavis UK Ltd)                | VERAPAMIL |
|  |  | Verapamil 80mg tablets                                 | VERAPAMIL |
|  |  | Verapamil 80mg tablets (Kent Pharmaceuticals Ltd)      | VERAPAMIL |
|  |  | Verapress MR 240mg tablets (Actavis UK Ltd)            | VERAPAMIL |
|  |  | Vera-Til SR 120mg tablets (Tillomed Laboratories Ltd)  | VERAPAMIL |

Supplemental table for drug coding.

| Condition                                                                                                                                                  | Fields                              | ICD-10s      | OPCS-4  | Drugs relation | Comments                                      |
|------------------------------------------------------------------------------------------------------------------------------------------------------------|-------------------------------------|--------------|---------|----------------|-----------------------------------------------|
| <b>Inclusion</b>                                                                                                                                           |                                     |              |         |                |                                               |
| Recent-onset AF ( $\leq$ 1 year prior to enrolment for prevalent - or after recruitment for incident)                                                      | 53, 131350                          |              |         |                |                                               |
| <b>2 One of:</b>                                                                                                                                           |                                     |              |         |                |                                               |
| Age > 75 years                                                                                                                                             | 21022, 53, 131350                   |              |         |                |                                               |
| Prior stroke or transient ischemic attack                                                                                                                  | HES                                 | G45, I60-I64 |         |                |                                               |
| <b>3 OR two of the following:</b>                                                                                                                          |                                     |              |         |                |                                               |
| Age > 65 years                                                                                                                                             | 21022, 53, 131350                   |              |         |                |                                               |
| Female sex                                                                                                                                                 | 31                                  |              |         |                |                                               |
| Arterial hypertension (chronic treatment for hypertension, estimated need for continuous antihypertensive therapy or resting blood pressure > 145/90 mmHg) | 4079, 94, 4080, 93, 6177, 6153, HES | I10-I15      |         |                | Males (6177) coding 2; Female (6153) coding 2 |
| Diabetes mellitus (treated by drugs or insulin) or impaired glucose tolerance                                                                              | 30750, HES, GP                      | E10-E14      |         | yes            |                                               |
| Severe coronary artery disease (previous)                                                                                                                  | HES, HES OPS                        | I21-I25      | K40-K51 |                |                                               |

|                                                                                                                                                                                  |                                     |  |                       |                                                                                      |
|----------------------------------------------------------------------------------------------------------------------------------------------------------------------------------|-------------------------------------|--|-----------------------|--------------------------------------------------------------------------------------|
| myocardial infarction, CABG or PCI)                                                                                                                                              |                                     |  |                       |                                                                                      |
| Stable heart failure (NYHA II or LVEF <50%), OR heart failure medication (ACE inhibitors, Angiotensin receptor blockers, Sacubitril/valsartan, Spironolactone, Eplerenone, SGLTi | HES, GP                             |  | I50, I110, I130, I132 | yes                                                                                  |
| Chronic kidney disease (MDRD stage III or IV)                                                                                                                                    | 21000, 30720, 30700, 21022, 31, HES |  | N183, N184            | Fields needed for GFR calculation Black ethnicity (21000) coding 4, 4001, 4002, 4003 |
| Peripheral artery disease                                                                                                                                                        |                                     |  | I739, I702, I740-I749 |                                                                                      |
| <b>Exclusion</b>                                                                                                                                                                 |                                     |  |                       |                                                                                      |
| Pregnant or of childbearing potential women                                                                                                                                      | 31, 53                              |  |                       |                                                                                      |
| Drug abuse                                                                                                                                                                       | HES                                 |  | F19                   |                                                                                      |
| Prior AF ablation or surgical therapy of AF                                                                                                                                      | HES OPS                             |  |                       | K621, K622, K522, K23                                                                |
| Severe mitral valve stenosis                                                                                                                                                     | HES                                 |  | I342, I050            |                                                                                      |

|                                                                                                                                                                                 |         |               |     |
|---------------------------------------------------------------------------------------------------------------------------------------------------------------------------------|---------|---------------|-----|
| Prosthetic mitral valve                                                                                                                                                         | HES OPS | K251-K254     |     |
| Clinically relevant hepatic dysfunction requiring specific therapy                                                                                                              | HES     | K70-K75       |     |
| Clinically manifest thyroid dysfunction requiring therapy After successful treatment of thyroid dysfunction, patients may be enrolled when their thyroid function is controlled | HES, GP | E05, E06, E30 | yes |
| Severe renal dysfunction (stage V, requiring or almost requiring dialysis)                                                                                                      | HES     | Z49, N185     |     |
| <b>Interventions</b>                                                                                                                                                            |         |               |     |
| <b>Rhythm control therapy</b>                                                                                                                                                   |         |               |     |
| Amiodarone                                                                                                                                                                      | GP      |               | yes |
| Sotalol                                                                                                                                                                         | GP      |               | yes |
| Dronedarone                                                                                                                                                                     | GP      |               | yes |
| Propafenone                                                                                                                                                                     | GP      |               | yes |
| Flecainide                                                                                                                                                                      | GP      |               | yes |
| AF ablation                                                                                                                                                                     | HES OPS | K621-K622     |     |
| <b>Rate control therapy: beta-blockers</b>                                                                                                                                      |         |               |     |
| Metoprolol                                                                                                                                                                      | GP      |               | yes |
| Carvedilol                                                                                                                                                                      | GP      |               | yes |
| Nebivolol                                                                                                                                                                       | GP      |               | yes |
| Bisoprolol                                                                                                                                                                      | GP      |               | yes |



| <b>Rate control therapy: others</b>     |              |                                              |     |
|-----------------------------------------|--------------|----------------------------------------------|-----|
| Digitoxin                               | GP           |                                              | yes |
| Digoxin                                 | GP           |                                              | yes |
| Verapamil                               | GP           |                                              | yes |
| Diltiazem                               | GP           |                                              | yes |
| <b>Baseline/others</b>                  |              |                                              |     |
| BMI                                     | 21001        |                                              |     |
| Other valvular disease                  | HES          | I359; I34                                    |     |
| Other pulmonary embolism                | HES          | I26                                          |     |
| <b>Outcomes</b>                         |              |                                              |     |
| Primary outcome                         |              |                                              |     |
| death from cardiovascular causes        | 40000, 40001 | I10 -I15, I20-I25, I26-I28, I30-I52, I70-I79 |     |
| onset stroke                            | HES          | I60-I64                                      |     |
| hospitalisation heart failure           | HES          | I50, I110, I130, I132, I249                  |     |
| hospitalisation acute coronary syndrome | HES          | I21, I22, I24                                |     |
| Secondary outcome                       |              |                                              |     |
| Number of nights in hospital per year   | HES          |                                              |     |
| <i>Onset dementia</i>                   | <i>HES</i>   | <i>F00, F01, F03</i>                         |     |

| <b>Adverse events</b>                                                                                     |               |                                        |  |
|-----------------------------------------------------------------------------------------------------------|---------------|----------------------------------------|--|
| Onset stroke                                                                                              | HES           | I60-I64                                |  |
| Death                                                                                                     | 40000         |                                        |  |
| Serious adverse event of special interest related to rhythm-control therapy (drugs + ablation)            |               |                                        |  |
| Non-fatal cardiac arrest                                                                                  | HES           | I46                                    |  |
| Drug-induced bradycardia                                                                                  | HES           | R001                                   |  |
| Atrioventricular block                                                                                    | HES           | I44                                    |  |
| <i>Torsades de pointes tachycardia</i>                                                                    | <i>HES</i>    | <i>I4581</i>                           |  |
| Serious adverse event related to atrial fibrillation ablation                                             |               |                                        |  |
| Pericardial tamponade                                                                                     | HES           | I314                                   |  |
| Major bleeding related to atrial fibrillation ablation                                                    | HES           | T810                                   |  |
| Blood pressure-related event                                                                              | HES           | T811, T812                             |  |
| Syncope                                                                                                   | HES           | R55                                    |  |
| Implantation of a pacemaker, defibrillator, cardiac resynchronization device, or any other cardiac device | HES OPS       | K721, K591-K592, K596, K601, K605-K607 |  |
| <b>Propensity score matching</b>                                                                          |               |                                        |  |
| Age (at the onset of AF)                                                                                  | defined above |                                        |  |

|                                        |               |     |                             |
|----------------------------------------|---------------|-----|-----------------------------|
| BMI                                    | defined above |     |                             |
| CHA <sub>2</sub> DS <sub>2</sub> -VASc | defined above |     |                             |
| Chronic kidney disease                 | defined above |     | Only ICD-10 terms were used |
| Severe coronary artery disease         | defined above |     | Only ICD-10 terms were used |
| Diabetes mellitus                      | defined above |     | Only ICD-10 terms were used |
| Heart failure                          | defined above |     | Only ICD-10 terms were used |
| Hypertension                           | defined above |     | Only ICD-10 terms were used |
| Peripheral artery disease              | defined above |     | Only ICD-10 terms were used |
| Sex                                    | defined above |     |                             |
| Stroke/TIA                             | defined above |     | Only ICD-10 terms were used |
| Valvular heart disease                 | defined above |     | Only ICD-10 terms were used |
| Alcohol abuse                          | HES           | F10 |                             |

|                                       |                                |                                                              |     |
|---------------------------------------|--------------------------------|--------------------------------------------------------------|-----|
| Anticoagulation treatment             | GP                             |                                                              | yes |
| Cancer (Malignancy)                   | 40005,<br>40006,<br>40013, HES | C00-C26,<br>C30-C34,<br>C37-C58,<br>C60-C86,<br>C88, C90-C97 |     |
| Chronic obstructive pulmonary disease | HES                            | J42, J431,<br>J432, J438,<br>J439, J44                       |     |
| Dilated cardiomyopathy                | HES                            | I420                                                         |     |
| Dyslipidaemia                         | HES                            | E78                                                          |     |
| Gastrointestinal bleeding             | HES                            | K921, K922                                                   |     |
| Gastrointestinal ulcer                | HES                            | K25-K28                                                      |     |
| History of Endocarditis               | HES                            | I33, I38, I39                                                |     |
| Hyperthyroidism                       | HES                            | E05                                                          |     |
| Hypertrophic cardiomyopathy           | HES                            | I421, I422                                                   |     |
| Hypothyroidism                        | HES                            | E00-E03                                                      |     |
| Myocardial infarction                 | HES                            | I21, I22, I252                                               |     |
| Obstructive sleep apnea               | HES                            | G473                                                         |     |
| Osteoporosis                          | HES                            | M80, M81,<br>M821, M828                                      |     |
| Pulmonary embolism                    | HES                            | I26                                                          |     |
| Smoking                               | 20116                          |                                                              |     |
| <b>Falsification analysis</b>         |                                |                                                              |     |
| Acute appendicitis                    | HES                            | K35                                                          |     |
| Alcoholic Liver Disease               | HES                            | K70                                                          |     |

|                                      |     |                                                                      |
|--------------------------------------|-----|----------------------------------------------------------------------|
| Asthma                               | HES | J459                                                                 |
| Benign paroxysmal positional vertigo | HES | H811                                                                 |
| Bladder Cancer                       | HES | C67                                                                  |
| Bronchiectasis                       | HES | J47                                                                  |
| Celiac Disease                       | HES | K900                                                                 |
| Chronic sinusitis                    | HES | J32                                                                  |
| Colon Cancer                         | HES | C18                                                                  |
| Epilepsy                             | HES | G40                                                                  |
| Frozen shoulder                      | HES | M750                                                                 |
| Glaucoma                             | HES | H40                                                                  |
| Lung Cancer                          | HES | C34                                                                  |
| Major fracture                       | HES | S72, S120,<br>S121, S122,<br>S127, S129,<br>S220, S221,<br>S320, S32 |
| Meniere's disease                    | HES | H810                                                                 |
| Multiple Sclerosis                   | HES | G35                                                                  |
| Otitis media                         | HES | H65, H66,<br>H67                                                     |
| Parkinsons Disease                   | HES | G20                                                                  |
| Prostate Cancer                      | HES | C61                                                                  |
| Psoriasis                            | HES | L40                                                                  |
| Renal Cancer                         | HES | C64                                                                  |
| Sickle Cell Disease                  | HES | D57                                                                  |
| Type 2 Diabetes Mellitus             | HES | E11                                                                  |

Supplemental table for definitions of outcomes and therapies
