# Supplementary material for: Eligibility for early rhythm control in patients with atrial fibrillation in the UK Biobank
Source: PubMed Central journal article supplement (PMC9664114; doi:10.1136/heartjnl-2022-321196), 2022-07-14

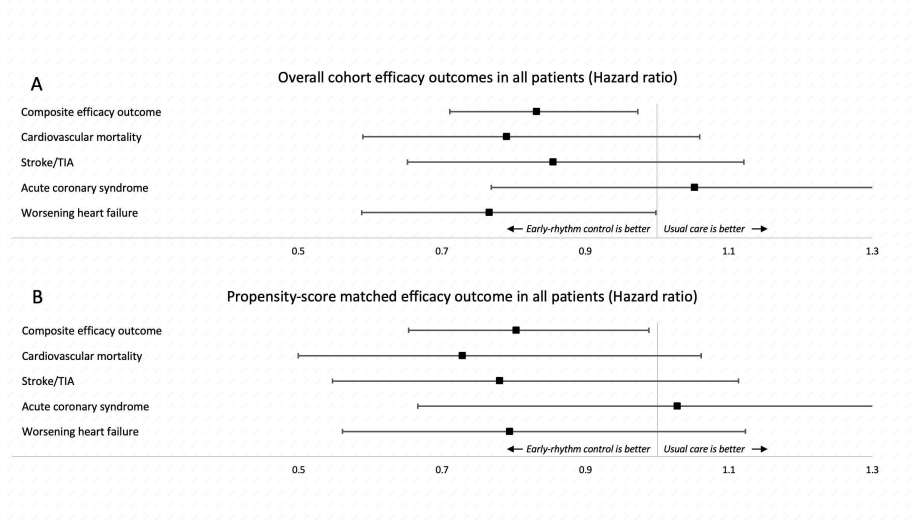

Supplement: heartjnl-2022-321196supp006.pdf [file heartjnl-2022-321196supp006.pdf]
