# Supplementary figures and images for: Eligibility for early rhythm control in patients with atrial fibrillation in the UK Biobank
Source: HighWire-hosted journal article supplement (doi:10.1136/heartjnl-2022-321196), 2022-07-14

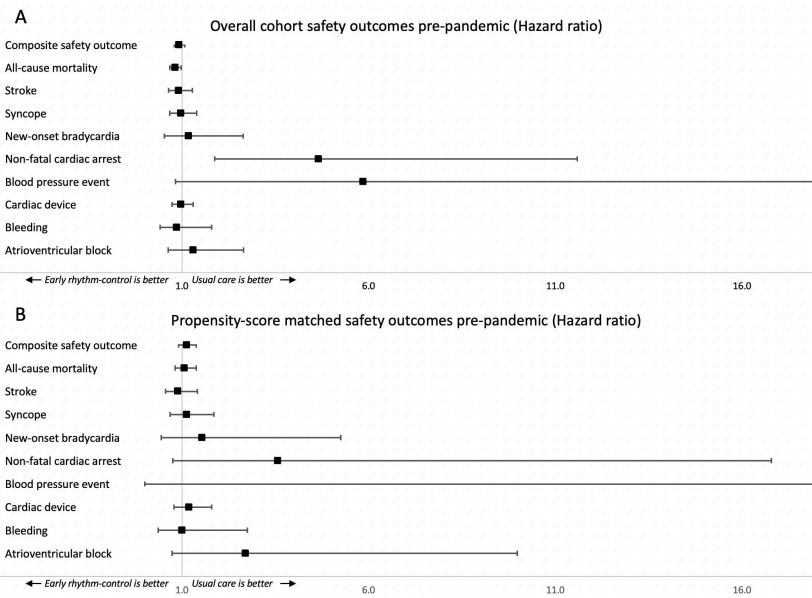

Supplement: heartjnl-2022-321196supp003_data_supplement.pdf [file heartjnl-2022-321196supp003_data_supplement.pdf]
